# Supplementary material for: Emotions and decision-making in boardrooms—a systematic review from behavioral strategy perspective
Source: Front Psychol. 2024 Nov 14;15:1473175. doi: 10.3389/fpsyg.2024.1473175 (PMC11603364; doi:10.3389/fpsyg.2024.1473175)
Supplement: Supplementary file 1 [file Table_1.xlsx]

## Sheet: Table 5
Author/Year	Title	Status	Inclusion / Exclusion Reason	Note
Aarkrog, V., & Wahlgren, B. (2022).	Goal orientation and decision-making in education.	Excluded	Wrong Context - The article does not address strategic decisions in a business context.	Career / Education
Abdel-Ghaffar, E. A., Wu, Y. J., & Daoudi, M. (2022).	Subject-dependent emotion recognition system based on multidimensional electroencephalographic signals: A Riemannian geometry approach.	Excluded	Wrong Context - The article does not address strategic decisions in a business context.	Decision / Emotion Theory
Abiola, L., Riquin, E., Michon, M., & Viallard, M. L. (2021).	Maternal emotions in fetal medicine.	Excluded	Wrong Context - The article does not address strategic decisions in a business context.	Health
Abro, A. H., & Treur, J. (2017).	A computational cognitive model of self-monitoring and decision making for desire regulation.	Excluded	Wrong Context - The article does not address strategic decisions in a business context.	Health / AI
Acconito, C., Rovelli, K., & Angioletti, L. (2023).	Neuroscience for a new concept of decision-making style.	Included	Included	Included
Adams, J. (2004).	"This is not where I belong!": The emotional, ongoing, and collective aspects of couples' decision making about where to live.	Excluded	Wrong Context - The article does not address strategic decisions in a business context.	Social
Aguilar, I. Z. (2022).	Neuroeconomics in cooperatives: Hierarchy of emotional patterns in the collective decision-making process for sustainable development.	Included	Included	Included
Ahern, S. P., Doyle, T. K., Marquis, F., Lesk, C., & Skrobik, Y. (2012).	Critically ill patients and end-of-life decision-making: The senior medical resident experience.	Excluded	Wrong Context - The article does not address strategic decisions in a business context.	Health
Ahumada-Tello, E., Ramos, K., Galván-Vela, F., & Ravina-Ripoll, R. (2022).	Collective emotional intelligence in IT firms: The role of subjective well-being and happiness.	Included	Included	Included
Akhgar, B., Parvin, E. S., & Sherkat, M. H. (2014).	Axiomatic agent based architecture for agile decision making in strategic information systems.	Excluded	Wrong Context - The article does not address strategic decisions in a business context.	AI
Akiyama, M., & Takemura, K. (1994).	The effect of negative affect and involvement on the decision-making process.	Excluded	Wrong Context - The article does not address strategic decisions in a business context.	Decision / Emotion Theory
Al Mamun, K. A., Alhussein, M., Sailunaz, K., & Islam, M. S. (2017).	Cloud-based framework for Parkinson's disease diagnosis and monitoring system for remote healthcare applications.	Excluded	Wrong Context - The article does not address strategic decisions in a business context.	Health
Al-Shawa, M., & IEEE. (2011).	Eliciting agents' preferences from contextual knowledge about their goals, constraints, priorities, emotions and attitudes using the constrained rationality framework.	Excluded	Wrong Publication Type	Conference Paper
Albanesi, B., Marchetti, A., D'Angelo, D., Capuzzo, M. T., Mastroianni, C., Artico, M., Lusignani, M., Piredda, M., & De Marinis, M. G. (2020).	Exploring nurses' involvement in artificial nutrition and hydration at the end of life: A scoping review.	Excluded	Wrong Context - The article does not address strategic decisions in a business context.	Health
Alcázar Silva, S. (2023).	Symbolic competence as a means of empowering heritage Spanish learners as language mediators.	Excluded	Wrong Context - The article does not address strategic decisions in a business context.	Career / Education
Alexopoulos, G. S. (2008).	Personalizing the care of geriatric depression.	Excluded	Wrong Context - The article does not address strategic decisions in a business context.	Health
Alfandre, D. (2011).	To the editor.	Excluded	Wrong Publication Type	Letter to the Editor
Alidoust, M. (2012).	A novel emotion-based decision making model to use in lifelike intelligent agents.	Excluded	Wrong Publication Type	Conference Paper
Almomani, A., Monreal, C., Sieira, J., Graña, J., & Sánchez, E. (2021).	Rational, emotional, and attentional models for recommender systems.	Excluded	Wrong Context - The article does not address strategic decisions in a business context.	Social
Almonacid-Fierro, A., Romero, M. M., & Fierro, M. A. (2020).	Elements that influence the process of decision-making in high-performance individual sports: A qualitative study.	Excluded	Wrong Context - The article does not address strategic decisions in a business context.	Sports
Alonso, L. E. E. (2021)	The neuroethics of beauty: Insights from Aldous Huxley's theory of knowledge.	Excluded	Wrong Publication Type	Book Chapter
Alvarez, J. (2021).	Initial development and validation of the secondary-school academic and career decision-making scale.	Excluded	Wrong Context - The article does not address strategic decisions in a business context.	Health
Alvarez, P., Zarazaga-Soria, F. J., & Baldassarri, S. (2020).	Mobile music recommendations for runners based on location and emotions: The DJ-Running system.	Excluded	Wrong Context - The article does not address strategic decisions in a business context.	Health / Sports
Amorim, A. C., Dos Santos, L. G. T., Poli-Neto, O. B., & Brito, L. G. O. (2018).	How does the patient react after reading the informed consent form of a gynecological surgery? A qualitative study.	Excluded	Wrong Context - The article does not address strategic decisions in a business context.	Health
An, S. Y., Aoki, T., & Suzuki, A. (2021).	Why people settle in shrinking communities: A unified framework of psychological, environmental, and cognitive factors.	Excluded	Wrong Context - The article does not address strategic decisions in a business context.	Social
Andriessen, K., Krysinska, K., Castelli Dransart, D. A., Dargis, L., & Mishara, B. L. (2020).	Grief after euthanasia and physician-assisted suicide: A systematic review.	Excluded	Wrong Context - The article does not address strategic decisions in a business context.	Health
Angioletti, L., Tormen, F., & Balconi, M. (2022).	Judgment and embodied cognition of lawyers: Moral decision-making and interoceptive physiology in the legal field.	Excluded	Wrong Context - The article does not address strategic decisions in a business context.	Legal
Anitawati, M. L., Nor, L. M. N., & Nagamachi, M. (2008).	Kansei structure and visualization of clothing websites cluster.	Excluded	Wrong Publication Type	Conference Paper
Anshari, M., Almunawar, M. N., & Razzaq, A. (2021).	Developing talents vis-a-vis Fourth Industrial Revolution.	Excluded	Wrong Context - The article does not address strategic decisions in a business context.	Studies not focused on emotions and the strategic decision-making process
Antes, A. L., Thiel, C. E., Martin, L. E., Stenmark, C. K., Connelly, S., Devenport, L. D., & Mumford, M. D. (2012)	Problem solving.	Excluded	Wrong Context - The article does not address strategic decisions in a business context.	Health
Antes, A. L., Thiel, C. E., Martin, L. E., Stenmark, C. K., Connelly, S., Devenport, L. D., & Mumford, M. D. (2012).	Applying cases to solve ethical problems: The significance of positive and process-oriented reflection.	Excluded	Wrong Context - The article does not address strategic decisions in a business context.	Social
Apple, R. F., Lock, J., & Peebles, R. (2006)	Is weight loss surgery right for you?	Excluded	Wrong Publication Type + Wrong Context	Book / Health
Arandjelovic, O. (2022).	COVID-19 and science communication: The recording and reporting of disease mortality.	Excluded	Wrong Context - The article does not address strategic decisions in a business context.	Health
Aref-Adib, G., O'Hanlon, P., Fullarton, K., Morant, N., Sommerlad, A., Johnson, S., & Osborn, D. (2016).	A qualitative study of online mental health information seeking behaviour by those with psychosis.	Excluded	Wrong Context - The article does not address strategic decisions in a business context.	Health
Arkin, R. C., Ulam, P., & Wagner, A. R. (2012).	Moral decision making in autonomous systems: Enforcement, moral emotions, dignity, trust, and deception.	Excluded	Wrong Context - The article does not address strategic decisions in a business context.	AI
Armbrust, R., Kentenich, H., Sibold, C., Montag, U., Berth, H., Albani, C., Dinkel, A., & Borkenhagen, A. (2009).	Attitudes of infertile patients towards donation of cryopreserved embryos and pronucleus stages for different uses: A review of the literature.	Excluded	Wrong Context - The article does not address strategic decisions in a business context.	Health
Aroesty-Cohen, E. (2014).	The uncertainty-induced psychological discomfort theory and coping in decision-making.	Excluded	Wrong Context - The article does not address strategic decisions in a business context.	Health
Arya, A., & DiPaola, S. (2007).	Multispace behavioral model for face-based affective social agents.	Excluded	Wrong Context - The article does not address strategic decisions in a business context.	Decision / Emotion Theory
Aschbacher, J., & Kroon, D. P. (2023).	Falling prey to bias? The influence of advisors on the manifestation of cognitive biases in the pre-M&A phase of organizations.	Included	Included	Included
Ashton-James, C. E. (2007).	The end of expressionism: A conditional approach to bounded emotionality in organizations.	Excluded	Wrong Publication Type	Conference Paper
Ashton-James, C. E., & Ashkanasy, N. M. (2008).	Affective events theory: A strategic perspective.	Excluded	Wrong Publication Type	Conference Paper
Asokan, A. R., Kumar, N., Ragam, A. V., Shylaja, S. S., & IEEE. (2022).	Interpretability for multimodal emotion recognition using concept activation vectors.	Excluded	Wrong Publication Type	Conference Paper
Assif, T., Shapira, E., & Romi, S. (2016).	The ongoing indecision of singles: Conceptual and emotional aspects of establishing a permanent relationship.	Excluded	Wrong Context - The article does not address strategic decisions in a business context.	Social
Atherton, P. J., Smith, T., Singh, J. A., Huntington, J., Diekmann, B. B., Huschka, M., & Sloan, J. A. (2013).	The relation between cancer patient treatment decision-making roles and quality of life.	Excluded	Wrong Context - The article does not address strategic decisions in a business context.	Health
Atkinson, J.-A., Skinner, A., Hackney, S., Mason, L., Heffernan, M., Currier, D., King, K., & Pirkis, J. (2020).	Systems modeling and simulation to inform strategic decision making for suicide prevention in rural New South Wales, Australia.	Excluded	Wrong Context - The article does not address strategic decisions in a business context.	Health / Social
Atoufian, H., Sun, W. T., Liu, Z. H., & ACM. (2020).	AI-bots as influencers in social behavior – A speculative concept.	Excluded	Wrong Publication Type	Conference Paper
Averbeck, B. B., & Duchaine, B. (2009).	Integration of social and utilitarian factors in decision making.	Excluded	Wrong Context - The article does not address strategic decisions in a business context.	Social
Avilés, L., Kean, S., & Tocher, J. (2022).	Ambiguous loss in organ donor families: A constructivist grounded theory.	Excluded	Wrong Context - The article does not address strategic decisions in a business context.	Health
Awan, S. (2018).	Rebuilding trust in community colleges.	Excluded	Wrong Context - The article does not address strategic decisions in a business context.	Career / Education
Azevedo, C. R. B., Raizer, K., & Souza, R. (2017)	A vision for human-machine mutual understanding, trust establishment, and collaboration.	Excluded	Wrong Publication Type	Conference Paper
Azode, C. M. (2019).	Culturally sensitive education for mental health providers treating African American adults with major depression.	Excluded	Wrong Context - The article does not address strategic decisions in a business context.	Health
Baccaglini, C. (2014).	Le conseguenze psichiche dell'aborto volontario del secondo trimestre: L'esperienza clinica tra la terapia post-aborto e la terapia dell'accoglienza. [The psychological consequences of voluntary abortion after the third month of pregnancy: A clinical experience between post abortion therapy and emotional support therapy.].	Excluded	Wrong Context - The article does not address strategic decisions in a business context.	Health
Bajaj, S., Lamichhane, B., Adhikari, B. M., & Dhamala, M. (2013).	Amygdala mediated connectivity in perceptual decision-making of emotional facial expressions.	Excluded	Wrong Context - The article does not address strategic decisions in a business context.	Health
Baker, D. F. (2017).	Teaching empathy and ethical decision making in business schools.	Excluded	Wrong Context - The article does not address strategic decisions in a business context.	Career / Education
Bakst, S., Romano-Zelekha, O., Ostrovsky, J., & Shohat, T. (2019).	Determinants associated with making prenatal screening decisions in a national study.	Excluded	Wrong Context - The article does not address strategic decisions in a business context.	Health
Balachandra, K., Swaminath, S., & Litman, L. C. (2005).	"Impact of Winko on absolute discharges": Reply.	Excluded	Wrong Publication Type + Wrong Context	Legal
Balatia, H., Wincenciak, J., & Buck, T. (2023).	The associations of anger and hope with project retention decisions: A case study.	Included	Included	Included
Balla, A., Saraceno, F., Rullo, M., Morales-Conde, S., Soler, E. M. T., Di Saverio, S., Guerrieri, M., Lepiane, P., Di Lorenzo, N., Adamina, M., Alarcón, I., Arezzo, A., Rodriguez, J. B., Boni, L., Biondo, S., Carrano, F. M., Chand, M., Jenkins, J. T., Davies, J., Rivilla, S. D., Delrio, P., Elmore, U., Espin-Basany, E., Fichera, A., Lorente, B. F., Francis, N., Ruiz, M. G., Hahnloser, D., Licard…	Protective ileostomy creation after anterior resection of the rectum: Shared decision-making or still subjective?	Excluded	Wrong Context - The article does not address strategic decisions in a business context.	Health
Balodis, I. M. (2020).	Neuropsychology in GD: Old and new directions.	Excluded	Wrong Context - The article does not address strategic decisions in a business context.	Health
Bamidis, P. D. (2017).	Affective learning: Principles, technologies, practice.	Excluded	Wrong Publication Type	Conference Paper
Barello, S., Maiorino, G., Palamenghi, L., Torri, C., Acampora, M., Gagliardi, L., & SPACE NET Study Group. (2022).	Exploring the motivational roots of getting vaccinated against COVID-19 in a population of vaccinated pediatric healthcare professionals: Evidence from an Italian cross-sectional study.	Excluded	Wrong Context - The article does not address strategic decisions in a business context.	Health
Barki, H., & Hartwick, J. (2004).	Conceptualizing the construct of interpersonal conflict.	Excluded	Wrong Context - The article does not address strategic decisions in a business context.	Decision / Emotion Theory
Barlow, D. H. (2008)	Clinical handbook of psychological disorders: A step-by-step treatment manual, 4th ed.	Excluded	Wrong Publication Type + Wrong Context	Book / Health
Barnard, S., Matthews, L., Messori, S., Podaliri-Vulpiani, M., & Ferri, N. (2016).	Laterality as an indicator of emotional stress in ewes and lambs during a separation test.	Excluded	Wrong Context - The article does not address strategic decisions in a business context.	Animal
Barnes, L. S. (2024).	Emotions' role in unconscious decision-making using the implicit association test: A quantitative approach.	Excluded	Wrong Publication Type	Dissertation
Barrio, P., Wurst, F. M., & Gual, A. (2018).	New alcohol biomarkers: New challenges.	Excluded	Wrong Context - The article does not address strategic decisions in a business context.	Health
Bartolini, W. F. (2005).	Prospective donors' cognitive and emotive processing of charitable gift requests.	Excluded	Wrong Context - The article does not address strategic decisions in a business context.	Social
Bastings, L., Beerendonk, C., Verhaak, C. (2017)	A young woman facing cancer treatment: Shared decision-making in fertility preservation.	Excluded	Wrong Publication Type + Wrong Context	Chapter / Health
Basu, S., & Dixit, S. (2022).	Increasing choices or decreasing hope? Explaining the rising prevalence of depression from a decision-making perspective.	Excluded	Wrong Context - The article does not address strategic decisions in a business context.	Health
Battaglia, A. J. (2021).	Legislators as leaders: Investigating and elucidating the influence of gender, religious beliefs, and mindfulness on legislative decision making.	Excluded	Wrong Context - The article does not address strategic decisions in a business context.	Legal
Baum, A. E., Solberg, L. C., Churchill, G. A., Ahmadiyeh, N., Takahashi, J. S., & Redei, E. E. (2006).	Test- and behavior-specific genetic factors affect WKY hypoactivity in tests of emotionality.	Excluded	Wrong Context - The article does not address strategic decisions in a business context.	Health
Baur, T., Heimerl, A., Lingenfelser, F., Wagner, J., Valstar, M. F., Schuller, B., & André, E. (2020).	Explainable cooperative machine learning with NOVA.	Excluded	Wrong Context - The article does not address strategic decisions in a business context.	AI
Bazerman, M. H., Gino, F., Shu, L. S. L., & Tsay, C. J. (2011).	Joint evaluation as a real-world tool for managing emotional assessments of morality.	Excluded	Wrong Context - The article does not address strategic decisions in a business context.	Social
Beaugerie, L., & Kirchgesner, J. (2019).	Balancing benefit vs risk of immunosuppressive therapy for individual patients with inflammatory bowel diseases.	Excluded	Wrong Context - The article does not address strategic decisions in a business context.	Health
Bechara, A. (2004).	The role of emotion in decision-making: Evidence from neurological patients with orbitofrontal damage.	Excluded	Wrong Context - The article does not address strategic decisions in a business context.	Health
Beeharry, M. W., Walden-Smith, T., & Moqeem, K. (2022).	Limb salvage versus amputation: Factors influencing the decision-making process and outcomes for mangled extremity injuries.	Excluded	Wrong Context - The article does not address strategic decisions in a business context.	Health
Bellardita, L., Villa, S., De Luca, L., Donegani, S., Magnani, T., Salvioni, R., & Valdagni, R. (2019).	Treatment decision-making process of men with newly diagnosed localized prostate cancer: The role of multidisciplinary approach in patient engagement.	Excluded	Wrong Context - The article does not address strategic decisions in a business context.	Health
Belle, S., Gittens, C., & Graham, T. C. N. (2019).	Programming with affect: How behavior trees and a lightweight cognitive architecture enable the development of non-player characters with emotions.	Excluded	Wrong Publication Type	Conference Paper
Beltrani, A., Reed, A. L., Zapf, P. A., & Otto, R. K. (2018).	Is hindsight really 20/20?: The impact of outcome information on the decision-making process.	Excluded	Wrong Context - The article does not address strategic decisions in a business context.	Legal
Ben-David, S., Cole, A., Brucato, G., Girgis, R. R., & Munson, M. R. (2019).	Mental health service use decision-making among young adults at clinical high risk for developing psychosis.	Excluded	Wrong Context - The article does not address strategic decisions in a business context.	Health
Benini, I. S. P., & Leal, E. M. (2016).	A experiência subjetiva do uso de psicotrópicos na perspectiva de pessoas com diagnóstico de esquizofrenia. [The subjective experience of using psychotropic drugs from the perspective of people diagnosed with schizophrenia.].	Excluded	Wrong Context - The article does not address strategic decisions in a business context.	Health
Benute, G. R. G., Nomura, R. M. Y., Liao, A. W., Brizot, M. D., De Lucia, M. C. S., & Zugaib, M. (2012).	Feelings of women regarding end-of-life decision making after ultrasound diagnosis of a lethal fetal malformation.	Excluded	Wrong Context - The article does not address strategic decisions in a business context.	Health
Berghmans, R., Dickenson, D., & Meulen, R. T. (2004).	Mental capacity: In search of alternative perspectives.	Excluded	Wrong Context - The article does not address strategic decisions in a business context.	Health
Berich Brieva, D. C. (2021).	Family practice physicians' acceptance and use of a replacement electronic medical record system: Instrumental case study.	Excluded	Wrong Context - The article does not address strategic decisions in a business context.	Health
Berti, C., Hofmann, E., Muehlbacher, S., & Kirchler, E. (2007).	Convincere i colleghi: Sviluppo di un questionario sulle tattiche di influenza nelle organizzazioni. [Persuade the colleagues: Development of a questionnaire on influence tactics in organizations.].	Excluded	Wrong Publication Type	Printed Article
Betan, E. J. (1997).	Understanding the ethical behavior of clinical psychologists: Incorporating affect into the model of ethical decision-making.	Excluded	Wrong Context - The article does not address strategic decisions in a business context.	Health
Beukes, J. (2022).	Facilitation of awareness in the decision-making process of a marital partner as an integral part of mental health.	Excluded	Wrong Context - The article does not address strategic decisions in a business context.	Health
Biolek, D., & Biolkova, V. (2001).	Computer-aided education in electrical engineering in light of didactic principles.	Excluded	Wrong Publication Type	Conference Paper
Blackburn, K. G., LeFebvre, L. E., & Brody, N. (2023).	How will your relationship be remembered? Virtual relational curation following a breakup.	Excluded	Wrong Context - The article does not address strategic decisions in a business context.	Social
Blanchfield, A., Hardy, J., & Marcora, S. (2014).	Non-conscious visual cues related to affect and action alter perception of effort and endurance performance.	Excluded	Wrong Context - The article does not address strategic decisions in a business context.	Health
Bleher, H., & Braun, M. (2023).	Reflections on putting AI ethics into practice: How three AI ethics approaches conceptualize theory and practice.	Excluded	Wrong Context - The article does not address strategic decisions in a business context.	AI
Blix, S. B. (2022).	Making independent decisions together: Rational emotions in legal adjudication.	Excluded	Wrong Context - The article does not address strategic decisions in a business context.	Legal
Boeder, S., Matamoros, D., & Mansy, C. (2023).	Practical guidance for healthcare providers on collaborating with people with type 2 diabetes: Advancing treatment and initiating injectable therapy.	Excluded	Wrong Context - The article does not address strategic decisions in a business context.	Health
Boettcher, D. K. (2014).	Adult adoptees' experiences during the decision-making process for birth parent reunification.	Excluded	Wrong Context - The article does not address strategic decisions in a business context.	Social
Boguszewski, P., & Zagrodzka, J. (2002).	Emotional changes related to age in rats – A behavioral analysis.	Excluded	Wrong Context - The article does not address strategic decisions in a business context.	Animal
Böhm, M., Nitzsche, R., & Walsch, J. (2022).	Clinical services for abortion in the second and third trimesters: An exploratory survey of the current state of care.	Excluded	Wrong Context - The article does not address strategic decisions in a business context.	Health
Böhm, M., Nitzsche, R., & Walsch, J. (2022).	Klinische angebote zum schwangerschaftsabbruch im zweiten und dritten trimenon – Eine explorative erhebung zur aktuellen versorgungslage. [Clinical services for abortion in the second and third trimesters: An exploratory survey of the current state of care.].	Excluded	Wrong Context - The article does not address strategic decisions in a business context.	Health
Bon, M., Doupona, M., Wilson-Gahan, S., Capranica, L., & Guidotti, F. (2022).	Transnational migration and dual career of Slovenian and Swiss elite female handball players: A longitudinal analysis.	Excluded	Wrong Context - The article does not address strategic decisions in a business context.	Health
Bonnet, A., Fernandez, L., Graziani, P., Rouan, G., & Pedinielli, J.-L. (2004).	Emotionnel subjectif et prise de risques: Rôle de l'anxiété et de la fatigue psychologique. [Subjective emotions and risk taking: The role of anxiety and psychological tiredness.].	Excluded	Wrong Context - The article does not address strategic decisions in a business context.	Health
Bossuyt, P. M. M., Raaymakers, T. W. M., Bonsel, G. J., & Rinkel, G. J. E. (2005).	Screening families for intracranial aneurysms: Anxiety, perceived risk, and informed choice.	Excluded	Wrong Context - The article does not address strategic decisions in a business context.	Health
Bouchareb, S., Chrifou, R., Bourik, Z., Nijpels, G., Hassanein, M., Westerman, M. J., & Elders, P. J. M. (2022).	"I am my own doctor": A qualitative study of the perspectives and decision-making process of Muslims with diabetes on Ramadan fasting.	Excluded	Wrong Context - The article does not address strategic decisions in a business context.	Health
Boukalová, H., & Mynaríková, L. (2014).	Characteristics of persons successful in lie detection through non-verbal behavior observation.	Excluded	Wrong Publication Type	Conference Paper
Bouleanu, E. L., Bouleanu, I., Mitran, R., & Dinicu, A. (2009).	Decision mechanisms in situations of stress risk versus situations of positive emotions.	Excluded	Wrong Publication Type	Conference Paper
Bourguignon, A., Briscoe, B., & Nemzer, L. (1999).	Genetic abortion: Considerations for patient care.	Excluded	Wrong Context - The article does not address strategic decisions in a business context.	Health
Bouzakraoui, M. S., Sadiq, A., & Alaoui, A. Y. (2019).	Appreciation of customer satisfaction through analysis facial expressions and emotions recognition.	Excluded	Wrong Publication Type	Conference Paper
Bowman, C. H., & Turnbull, O. H. (2004).	Emotion-based learning on a simplified card game: The Iowa and Bangor gambling tasks.	Excluded	Wrong Context - The article does not address strategic decisions in a business context.	Health
Bradley, B. H., Anderson, H. J., Baur, J. E., & Klotz, A. C. (2015).	When conflict helps: Integrating evidence for beneficial conflict in groups and teams under three perspectives.	Excluded	Wrong Context - The article does not address strategic decisions in a business context.	Decision / Emotion Theory
Brady, D. (2006).	A preliminary investigation of active and retired NFL players' knowledge of concussions.	Excluded	Wrong Context - The article does not address strategic decisions in a business context.	Career / Education
Brake, E. S. (2011).	A grounded theory study: Valuing aging – A model describing gerontological social work career choice.	Excluded	Wrong Context - The article does not address strategic decisions in a business context.	Health
Brand, M. (2008).	Does the feedback from previous trials influence current decisions? A study on the role of feedback processing in making decisions under explicit risk conditions.	Excluded	Wrong Context - The article does not address strategic decisions in a business context.	health
Bratianu, C., & Vatamanescu, E. M. (2017).	The impact of the entropic knowledge dynamics in the decision-making process.	Excluded	Wrong Publication Type	Conference Paper
Bregar, B., Skela-Savic, B., & Plesnicar, B. K. (2018).	Cross-sectional study on nurses' attitudes regarding coercive measures: The importance of socio-demographic characteristics, job satisfaction, and strategies for coping with stress.	Excluded	Wrong Context - The article does not address strategic decisions in a business context.	Health
Brembo, E. A., Kapstad, H., Eide, T., Månsson, L., Van Dulmen, S., & Eide, H. (2016).	Patient information and emotional needs across the hip osteoarthritis continuum: A qualitative study.	Excluded	Wrong Context - The article does not address strategic decisions in a business context.	Health
Bremer, A., Dahlberg, K., & Sandman, L. (2012).	Balancing between closeness and distance: Emergency medical services personnel's experiences of caring for families at out-of-hospital cardiac arrest and sudden death.	Excluded	Wrong Context - The article does not address strategic decisions in a business context.	Health
Broche-Pérez, Y., Jiménez, L. F. H., & Omar-Martínez, E. (2016).	Neural substrates of decision-making.	Excluded	Wrong Context - The article does not address strategic decisions in a business context.	Health
Brown, C., George-Curran, R., & Smith, M. L. (2003).	The role of emotional intelligence in the career commitment and decision-making process.	Excluded	Wrong Context - The article does not address strategic decisions in a business context.	Health
Brown, J. B., Karley, M. L., Boudville, N., Bullas, R., Garg, A. X., & Muirhead, N. (2008).	Living kidney donors' experiences with the health care system.	Excluded	Wrong Context - The article does not address strategic decisions in a business context.	Health
Brown, N., & Michael, M. (2002).	From authority to authenticity: The changing governance of biotechnology.	Excluded	Wrong Context - The article does not address strategic decisions in a business context.	Health
Brown, S. G., & Daus, C. S. (2016).	Avoidant but not avoiding: The mediational role of anticipated regret in police decision-making.	Excluded	Wrong Context - The article does not address strategic decisions in a business context.	Social
Brudzynski, S. M. (2007).	Ultrasonic calls of rats as indicator variables of negative or positive states: Acetylcholine-dopamine interaction and acoustic coding.	Excluded	Wrong Context - The article does not address strategic decisions in a business context.	Animal
Bryer, T. A. (2013).	Public participation in regulatory decision-making: Cases from Regulations.gov.	Excluded	Wrong Context - The article does not address strategic decisions in a business context.	Social / Legal
Bryon, E., De Casterl, B. D., & Gastmans, C. (2012).	‘Because we see them naked’ – Nurses’ experiences in caring for hospitalized patients with dementia: Considering artificial nutrition or hydration (ANH).	Excluded	Wrong Context - The article does not address strategic decisions in a business context.	Health
Buckey, J. W., & Molina, O. (2012).	Honoring patient care preferences: Surrogates speak.	Excluded	Wrong Context - The article does not address strategic decisions in a business context.	Health
Budakova, D. (2011).	Behavior of home care intelligent virtual agent with pre-think architecture.	Excluded	Wrong Publication Type	Health
Budakova, D., & Dakovski, L. (2012).	Social behavior investigation of an intelligent virtual agent with the help of typical working student's life scenario modeling.	Excluded	Wrong Publication Type	Conference Paper
Bühler, J., Ebermann, H.-J., Hamm, F., & Reuter-Leahr, D. (2013)	Decision Making	Excluded	Wrong Publication Type	Book Chapter
Burrell, E. (2015).	Emotional intelligence as a potential admissions criterion for graduate school in psychology.	Excluded	Wrong Context - The article does not address strategic decisions in a business context.	Career / Education
Bursztajn, H. (1986).	Ethicogenesis: Response to the articles "Consultation-liaison psychiatry and the teaching of ethics" by J. R. McCartney, and "Consultation-liaison psychiatry and clinical ethics" by J. R. Hayes.	Excluded	Wrong Context - The article does not address strategic decisions in a business context.	Health
Caballero, J. A., & Menez Díaz, M. (2021).	On the role of vocal emotions in social decision-making.	Excluded	Wrong Context - The article does not address strategic decisions in a business context.	Decision / Emotion Theory
Cabanac, M., Guillaume, J., Balasko, M., & Fleury, A. (2002).	Pleasure in decision-making situations.	Excluded	Wrong Context - The article does not address strategic decisions in a business context.	Decision / Emotion Theory
Cabrera, D., Cubillos, C., Urra, E., & Mellado, R. (2020).	Framework for incorporating artificial somatic markers in the decision-making of autonomous agents.	Excluded	Wrong Context - The article does not address strategic decisions in a business context.	Decision / Emotion Theory
Cahill, A. (2024).	A balancing act: Examining the relationship between school leadership and political tension in education decision-making.	Excluded	Wrong Context - The article does not address strategic decisions in a business context.	Career / Education
Cai, J. (2023).	Understanding the voluntary moderation practices in live streaming communities.	Excluded	Wrong Context - The article does not address strategic decisions in a business context.	Social
Cai, X. M., Robinson, J., Muehlschlegel, S., White, D. B., Holloway, R. G., Sheth, K. N., Fraenkel, L., & Hwang, D. Y. (2015).	Patient preferences and surrogate decision making in neuroscience intensive care units.	Excluded	Wrong Context - The article does not address strategic decisions in a business context.	Health
Cain, K. M. (2018).	The effects of bullying type and special education status on the evaluation and referral of students to mental health counseling.	Excluded	Wrong Context - The article does not address strategic decisions in a business context.	Health
Calikli, G., Al-Eryani, M., Baldebo, E., Horkoff, J., Ask, A., & IEEE. (2018).	Effects of automated competency evaluation on software engineers' emotions and motivation: A case study.	Excluded	Wrong Publication Type	Conference Paper
Calogiuri, G., Keegan, B. J., Birkheim, S. L., Rydgren, T. L., Flaten, O. E., Fröhlich, F., & Litleskare, S. (2022).	A mixed-methods exploration of virtual reality as a tool to promote green exercise.	Excluded	Wrong Context - The article does not address strategic decisions in a business context.	Health
Cambon, L., Petit, A., Ridde, V., Dagenais, C., Porcherie, M., Pommier, J., Ferron, C., Minary, L., & Alla, F. (2017).	Evaluation of a knowledge transfer scheme to improve policy making and practices in health promotion and disease prevention setting in French regions: A realist study protocol.	Excluded	Wrong Context - The article does not address strategic decisions in a business context.	Health
Campbell, A., Whitehead, J., & Finkelstein, S. (2009).	Why good leaders make bad decisions.	Included	Included	Included
Campbell, C. (2022).	A social, structural, and intersectional analysis of HIV status disclosure among Black gay and bisexual men living with HIV in the deep south.	Excluded	Wrong Context - The article does not address strategic decisions in a business context.	Health
Cappleman, R. (2021).	Managing bipolar moods without medication: A qualitative investigation.	Excluded	Wrong Context - The article does not address strategic decisions in a business context.	Health
Carneiro, J., Conceição, L., Martinho, D., Marreiros, G., & Novais, P. (2018).	Including cognitive aspects in multiple criteria decision analysis.	Excluded	Wrong Context - The article does not address strategic decisions in a business context.	Decision / Emotion Theory
Carter, J., Stabile, C., Gunn, A., & Sonoda, Y. (2013).	The physical consequences of gynecologic cancer surgery and their impact on sexual, emotional, and quality of life issues.	Excluded	Wrong Context - The article does not address strategic decisions in a business context.	Health
Casarrubea, M., Faulisi, F., Sorbera, F., & Crescimanno, G. (2015).	The effects of different basal levels of anxiety on the behavioral shift analyzed in the central platform of the elevated plus maze.	Excluded	Wrong Context - The article does not address strategic decisions in a business context.	Health
Castellana, G. B., Schraiber, L. B., da Silva, T. F., & Barros, D. M. (2020).	Decision-making for involuntary commitment in Brazil: Elucidating misunderstandings between reasons and justification: Corrigendum.	Excluded	Wrong Context - The article does not address strategic decisions in a business context.	Health
Castro, W. (2023).	The lived experiences of principals in the northeast United States in supporting the social-emotional wellbeing of their school community during the COVID-19 pandemic.	Excluded	Wrong Context - The article does not address strategic decisions in a business context.	Social
Cavedini, P., Zorzi, C., Baraldi, C., Patrini, S., Salomoni, G., Bellodi, L., Freire, R. C., & Perna, G. (2012).	The somatic marker affecting decisional processes in obsessive-compulsive disorder.	Excluded	Wrong Context - The article does not address strategic decisions in a business context.	Health
Cerna, Z. (2001).	Psychological preparedness for breast cancer surgery.	Excluded	Wrong Context - The article does not address strategic decisions in a business context.	Health		Surgery	Breast Neoplasms,,
Cervantes, J. A., Ramos, F., & Wang, Y. X. (2015).	A formal model inspired on human decision-making process.	Excluded	Wrong Publication Type	Conference Paper
Chadha, A. (2018).	The importance of anxiety in understanding how decision making is affected in autism spectrum disorder.	Excluded	Wrong Context - The article does not address strategic decisions in a business context.	Health
Chambers-Evans, J. (2002).	The family as window onto the world of the patient: Involving patients and families in the decision-making process.	Excluded	Wrong Context - The article does not address strategic decisions in a business context.	Health
Chambers, A. C. (2010).	Application of the choicemaker curriculum for teaching self-determination skills to students with emotional and behavioral disabilities in a private day setting.	Excluded	Wrong Context - The article does not address strategic decisions in a business context.	Career / Education
Chan, R. K. H. (2021).	Tackling COVID-19 risk in Hong Kong: Examining distrust, compliance and risk management.	Excluded	Wrong Context - The article does not address strategic decisions in a business context.	Social
Chao, Y. H., Wang, S. Y., & Sheu, S. J. (2023).	Decision-making process for breast-conserving therapy from the perspective of women with breast cancer: A grounded theory study.	Excluded	Wrong Context - The article does not address strategic decisions in a business context.	Health
Chatrung, C., Sorajjakool, S., & Amnatsatsue, K. (2015).	Wellness and religious coping among Thai individuals living with chronic kidney disease in southern California.	Excluded	Wrong Context - The article does not address strategic decisions in a business context.	Social
Chen, C. F., & Girish, V. G. (2023).	Investigating the use experience of restaurant service robots: The cognitive-affective-behavioral framework.	Excluded	Wrong Context - The article does not address strategic decisions in a business context.	Social
Chen, H. C. J. (2019).	Empirical study of process influencing factors on cross-cultural team work performance.	Excluded	Wrong Publication Type	Conference Paper
Chen, M. K. J., & Ayoko, O. B. (2012).	Conflict and trust: The mediating effects of emotional arousal and self-conscious emotions.	Included	Included	Included
Chen, Z. J., Lv, S., & Qin, S. L. (2022).	Relationship between engineering undergraduates' career decision-making self-efficacy and their satisfaction with the online practicum teaching.	Excluded	Wrong Context - The article does not address strategic decisions in a business context.	Health
Chien, C. H., Chuang, C. K., Liu, K. L., Li, C. L., & Liu, H. E. (2014).	Changes in decisional conflict and decisional regret in patients with localized prostate cancer.	Excluded	Wrong Context - The article does not address strategic decisions in a business context.	Health
Chitpin, S. (2019).	Decision making, distributed leadership and the objective knowledge growth framework.	Excluded	Wrong Context - The article does not address strategic decisions in a business context.	Career / Education
Cho, J. Y., & Suh, J. (2020).	Spatial color efficacy in perceived luxury and preference to stay: An eye-tracking study of retail interior environment.	Excluded	Wrong Context - The article does not address strategic decisions in a business context.	Social
Chohra, A., Madani, K., & Van der Wal, C. N. (2018).	Group affect in complex decision-making: Theory and formalisms from psychology and computer science.	Excluded	Wrong Publication Type	Conference Paper
Christodoulidis, G., Kouliou, M. N., Koumarelas, K. E., & Giakoustidis, D., & Athanasiou, T. (2023).	Quality of life in patients undergoing surgery for upper GI malignancies.	Excluded	Wrong Context - The article does not address strategic decisions in a business context.	Health
Chuang, R. X., Ishii, K., Kim, H. S., & Sherman, D. K. (2022).	Swinging for the fences versus advancing the runner: Culture, motivation, and strategic decision making.	Excluded	Wrong Context - The article does not address strategic decisions in a business context.	Sports
Chung, D., Kim, Y. T., & Jeong, J. (2013).	Cognitive motivations of free riding and cooperation and impaired strategic decision making in schizophrenia during a public goods game.	Excluded	Wrong Population + Wrong Context - The article does not address strategic decisions in a business context.	Health
Cimellaro, G. P., Mahin, S., & Domaneschi, M. (2019).	Integrating a human behavior model within an agent-based approach for blasting evacuation.	Excluded	Wrong Context - The article does not address strategic decisions in a business context.	Social
Cláudio, V. (2009).	Entre los caminos A y B elijo el incierto C: El bien, el mal y los dilemas éticos. [Between paths A and B, I choose uncertain C: Good, bad and ethical dilemmas.].	Excluded	Wrong Context - The article does not address strategic decisions in a business context.	Social
Clayman, M. L., & Morris, M. A. (2013).	Patients in context: Recognizing the companion as part of a patient-centered team.	Excluded	Wrong Context - The article does not address strategic decisions in a business context.	Health
Cobb, M. (2023).	Teacher perspectives on identity during ethical decision-making operations within teaching classrooms.	Excluded	Wrong Context - The article does not address strategic decisions in a business context.	Career / Education
Cobo-Angel, C., Gohar, B., & LeBlanc, S. J. (2022).	Values and risk perception shape Canadian dairy farmers' attitudes toward prudent use of antimicrobials.	Excluded	Wrong Context - The article does not address strategic decisions in a business context.	Social / Environmental
Cocco, E., Caoci, A., Lorefice, L., & Marrosu, M. G. (2017).	Perception of risk and shared decision making process in multiple sclerosis.	Excluded	Wrong Context - The article does not address strategic decisions in a business context.	Health
Coffey, C. A., Brodsky, S. L., Parrott, C. T., & Avila, A. (2023).	Equivocal findings in forensic evaluations.	Excluded	Wrong Context - The article does not address strategic decisions in a business context.	Health
Coget, J. F., Haag, C., & Gibson, D. E. (2011).	Anger and fear in decision-making: The case of film directors on set.	Excluded	Wrong Context - The article does not address strategic decisions in a business context.	Midia
Cohen, L., Parker, P. A., Sterner, J., & De Moor, C. (2002).	Quality of life in patients with malignant melanoma participating in a phase I trial of an autologous tumor-derived vaccine.	Excluded	Wrong Context - The article does not address strategic decisions in a business context.	Health
Collenette, J., Atkinson, K., Bloembergen, D., & Tuyls, K. (2017).	Environmental effects on simulated emotional and moody agents.	Excluded	Wrong Context - The article does not address strategic decisions in a business context.	Social
Collura, T. F. (2016).	Modeling the frontal emotional decision-making process.	Excluded	Wrong Publication Type	Conference Paper - No Abstract
Conley, C. C. (2018).	Decision-making among women at high risk for breast cancer: Complementary roles of emotion and cognition.	Excluded	Wrong Context - The article does not address strategic decisions in a business context.	Health
Cooper, L. A. (2006).	At the center of decision making in mental health services and interventions research: Patients, clinicians, or relationships?	Excluded	Wrong Context - The article does not address strategic decisions in a business context.	Health
Correa, R. C., San Juan, C. A., & Rodríguez, R. L. (2021).	Technology to decide the facts in judicial proceedings.	Excluded	Wrong Context - The article does not address strategic decisions in a business context.	Legal
Corredera, A., Romero, M., & Moya, J. M. (2019).	Emotional decision-making biases prediction in cyber-physical systems.	Excluded	Wrong Context - The article does not address strategic decisions in a business context.	AI
Côté-Lussier, C. (2013).	Fight fire with fire: The effect of perceived anger on punitive intuitions.	Excluded	Wrong Context - The article does not address strategic decisions in a business context.	Social
Côté-Lussier, C., & David, J. D. (2023).	Intuitive anger in the context of crime and punishment.	Excluded	Wrong Context - The article does not address strategic decisions in a business context.	Health
Courtenay, T., & Baraitser, P. (2021).	Online contraceptive discussion forums: A qualitative study to explore information provision.	Excluded	Wrong Context - The article does not address strategic decisions in a business context.	Health
Cristofaro, M., Giardino, P. L., Malizia, A. P., & Mastrogiorgio, A. (2022).	Affect and cognition in managerial decision making: A systematic literature review of neuroscience evidence.	Included	Included	Included
Cruz, C., & Justo, R. (2017).	Portfolio entrepreneurship as a mixed gamble: A winning bet for family entrepreneurs in SMEs.	Included	Included	Included
Cummins, D. D., & Cummins, R. C. (2012).	Emotion and deliberative reasoning in moral judgment.	Excluded	Wrong Context - The article does not address strategic decisions in a business context.	Social
Cunningham, M., Murphy, M., Sweeney, P., & Richards, H. L. (2022).	Patient reported factors influencing the decision-making process of men with localized prostate cancer when considering active surveillance: A systematic review and thematic synthesis.	Excluded	Wrong Context - The article does not address strategic decisions in a business context.	Health
Curtis, L. C., Wells, S. M., Penney, D. J., Ghose, S. S., Mistler, L. A., Mahone, I. H., Delphin-Rittmon, M., Del Vecchio, P., & Lesko, S. (2010).	Pushing the envelope: Shared decision making in mental health.	Excluded	Wrong Context - The article does not address strategic decisions in a business context.	Health
Czyż, S. H. (2021).	Variability of practice, information processing, and decision making: How much do we know?	Excluded	Wrong Context - The article does not address strategic decisions in a business context.	Sports
Dagenhart, M. C. (2005).	Relationship of college students' response styles on the Strong Interest Inventory to scores on the Beck Depression Inventory and the Career Thoughts Inventory.	Excluded	Wrong Context - The article does not address strategic decisions in a business context.	Health
Dai, Q., & Guo, L. (2019).	Two novel hybrid self-organizing map-based emotional learning algorithms.	Excluded	Wrong Context - The article does not address strategic decisions in a business context.	Decision / Emotion Theory
Dang, Y. Y., Guo, S. S., Guo, X. T., Wang, M. H., & Xie, K. X. (2021).	Privacy concerns about health information disclosure in mobile health: Questionnaire study investigating the moderation effect of social support.	Excluded	Wrong Context - The article does not address strategic decisions in a business context.	Health
Daniels, K. (1999).	Affect and strategic decision making.	Included	Included	Included
Danneels, E., & Vestal, A. (2020).	Normalizing vs. analyzing: Drawing the lessons from failure to enhance firm innovativeness.	Excluded	Wrong Context - The article does not address strategic decisions in a business context.	Studies not focused on emotions and the strategic decision-making process
Danno, M., Wakabayashi, A., & IEEE. (2010).	Neuropsychological approach to identifying risky driving behaviors.	Excluded	Wrong Publication Type	Conference Paper
Darses, F., Bernier, M., Berthelot, V., Fornette, M. P., Launay, Y., Dozias, B., Chastres, V., & Fournier, J. (2023).	Effects of mindfulness training on decision-making in critical and high-demand situations: A pilot study in combat aviation.	Excluded	Wrong Context - The article does not address strategic decisions in a business context.	Social
Daskal, S., Ben-Eliyahu, A., Levy, G., Ben-Haim, Y., & Avny, R. (2022).	Earthquake vulnerability reduction by building a robust social-emotional preparedness program.	Excluded	Wrong Context - The article does not address strategic decisions in a business context.	Social / Environmental
Davies, N., De Souza, T., Rait, G., Meehan, J., & Sampson, E. L. (2021).	Developing an applied model for making decisions towards the end of life about care for someone with dementia.	Excluded	Wrong Context - The article does not address strategic decisions in a business context.	Health
Davis, M., Oaten, M., Tapp, C., & Occhipinti, S. (2022).	Development and psychometric evaluation of the aversion to bowel cancer screening scale.	Excluded	Wrong Context - The article does not address strategic decisions in a business context.	Health
Dazeley, R., Vamplew, P., Foale, C., Young, C., Aryal, S., & Cruz, F. (2021).	Levels of explainable artificial intelligence for human-aligned conversational explanations.	Excluded	Wrong Context - The article does not address strategic decisions in a business context.	AI
De Boer, M., Reimer-Kirkham, S., & Sawatzky, R. (2022).	How nurses' and physicians' emotions, psychosocial factors, and professional roles influence the end-of-life decision making process: An interpretive description study.	Excluded	Wrong Context - The article does not address strategic decisions in a business context.	Health
De Col, R. Z. F. (2021).	The relationship between spirituality and theology from the relationship between what is lived and what is thought.	Excluded	Wrong Context - The article does not address strategic decisions in a business context.	Social
De Jong, B. A., Dirks, K. T., & Gillespie, N. (2016).	Trust and team performance: A meta-analysis of main effects, moderators, and covariates.	Excluded	Wrong Context - The article does not address strategic decisions in a business context.	Incluir
De Lima, I. M. N., & Alessi, N. P. (2002).	O serviço de assistência ambulatorial em saúde mental de uma unidade de saúde do município de Ribeirão Preto, SP. [The outpatient mental health care delivered by a basic health center, city of Ribeirão Preto, SP, Brazil.].	Excluded	Wrong Context - The article does not address strategic decisions in a business context.	Health
De Mello, F. L., & De Souza, S. A. (2021).	Decision maker profiling using their mental behavior pattern.	Excluded	Wrong Context - The article does not address strategic decisions in a business context.	Health
De Panfilis, L., Tanzi, S., Perin, M., Turola, E., & Artioli, G. (2020).	"Teach for ethics in palliative care": A mixed-method evaluation of a medical ethics training programme.	Excluded	Wrong Context - The article does not address strategic decisions in a business context.	Health
De Ruyter, B., & Van Dantzig, S. (2019).	Ambient lighting atmospheres for influencing emotional expressiveness and cognitive performance.	Excluded	Wrong Publication Type	Conference Paper
Dean, M., & Fisher, C. L. (2019).	Uncertainty and previvors' cancer risk management: Understanding the decision-making process.	Excluded	Wrong Population + Wrong Context - The article does not address strategic decisions in a business context.	Health
Dees, M. K., Vernooij-Dassen, M. J., Dekkers, W. J., Elwyn, G., Vissers, K. C., & Van Weel, C. (2013).	Perspectives of decision-making in requests for euthanasia: A qualitative research among patients, relatives and treating physicians in the Netherlands.	Excluded	Wrong Context - The article does not address strategic decisions in a business context.	Health
Dehghani, M., Carnevale, P. J., & Gratch, J. (2014).	Interpersonal effects of expressed anger and sorrow in morally charged negotiation.	Excluded	Wrong Context - The article does not address strategic decisions in a business context.	Social
Delbon, P., Maghin, F., Falconi, B., & Conti, A. (2022).	Resource scarcity and allocation criteria during the COVID-19 pandemic: Ethical issues.	Excluded	Wrong Context - The article does not address strategic decisions in a business context.	Social
Delgado, C. E. Y., & Montoya, A. O. (2018).	Comitês de ética y salud mental. [Ethics committees and mental health.].	Excluded	Wrong Context - The article does not address strategic decisions in a business context.	Health
Dellaposta, B. C. (2016).	Self-leadership: Understanding the driving forces behind decision-making.	Excluded	Wrong Publication Type	Dissertation
Demedts, D., Roelands, M., Libbrech, J., & Bilsen, J. (2018).	The attitudes, role and knowledge of mental health nurses towards euthanasia because of unbearable mental suffering in Belgium: A pilot study.	Excluded	Wrong Context - The article does not address strategic decisions in a business context.	Health
Demoulin, H., & Murphy, J. (2005).	Représentations temporelles et décision dans la relation de conseil en orientation scolaire. [Mental representations of time and decision making in career counseling.].	Excluded	Wrong Context - The article does not address strategic decisions in a business context.	Health
Denberg, T. D., Melhado, T. V., & Steiner, J. F. (2006).	Patient treatment preferences in localized prostate carcinoma: The influence of emotion, misconception, and anecdote.	Excluded	Wrong Context - The article does not address strategic decisions in a business context.	Health
DeRenzo, E. G., & Schwartz, J. (2010).	Building Esprit de Corps: Learning to better navigate between "my" patient and "our" patient.	Excluded	Wrong Context - The article does not address strategic decisions in a business context.	Health
DeTombe, D. (2017).	Societal problems more complex than presumed: The Compram methodology.	Excluded	Wrong Context - The article does not address strategic decisions in a business context.	Social
Dhaliwal, G. (2011).	Going with your gut.	Excluded	Wrong Context - The article does not address strategic decisions in a business context.	Health
Di Mattei, V. E., Perego, G., Rancoita, P. M. V., Taranto, P., Carnelli, L., Mangili, G., Sarais, V., Bergamini, A., & Candiani, M. (2020).	Psychological aspects associated with fertility preservation in oncology: An exploratory study.	Excluded	Wrong Context - The article does not address strategic decisions in a business context.	Health
Diamond, R. J. (2011).	The medication question: Weighing your mental health treatment options, for patients and their families.	Excluded	Wrong Context - The article does not address strategic decisions in a business context.	Health
Dias, A., Gil, I. J. N., Santoro, F., Madias, J. E., Pelliccia, F., Brunetti, N. D., Salmoirago-Blotcher, E., Sharkey, S. W., Eitel, I., Akashi, Y. J., El-Battrawy, I., Franco, E., Akin, I., Jaguszewski, M., Dawson, D., Figueredo, V. M., Napp, L. C., Christensen, T. E., Hebert, K., Ben-Dor, I., Ozaki, Y., García-Garcia, H. M., Kajita, A. H., Akasaka, T., Kurisu, S., Lerman, A., & Waksman, R. (201…	Takotsubo syndrome: State-of-the-art review by an expert panel – Part 2.	Excluded	Wrong Context - The article does not address strategic decisions in a business context.	Health
Dickert, S., Herbig, B., Glöckner, A., Gansen, C., & Portack, R. (2012).	The more the better? Effects of training, experience and information amount in legal judgments.	Excluded	Wrong Context - The article does not address strategic decisions in a business context.	Social / Legal
Diefenbach, M. A., Mohamed, N. E., Butz, B. P., Bar-Chama, N., Stock, R., Cesaretti, J., Hassan, W., Samadi, D., & Hall, S. J. (2012).	Acceptability and preliminary feasibility of an Internet/CD-ROM-based education and decision program for early-stage prostate cancer patients: Randomized pilot study.	Excluded	Wrong Context - The article does not address strategic decisions in a business context.	Health
Dina, M. M., Ciurbea, F. E., & Rada, C. (2022).	Criminogenic cognitions and the risk of criminal recidivism: Literature review.	Excluded	Wrong Context - The article does not address strategic decisions in a business context.	Legal
Diochon, P. F., & Nizet, J. (2015).	Ethical codes and executive coaches: One size does not fit all.	Excluded	Wrong Context - The article does not address strategic decisions in a business context.	Social
Djamasbi, S., & Loiacono, E. T. (2008).	Do men and women use feedback provided by their decision support systems (DSS) differently?	Excluded	Wrong Context - The article does not address strategic decisions in a business context.	Social
Djouamai, Z., & Ying, L. (2020).	A memory-based decision-making model for multilingual alternatives: The role of memory, emotion and language.	Excluded	Wrong Publication Type	Conference Paper
Dozier, V. C., Morgan, M., Burbrink, I., & Peace, C. (2022).	Standardized career course curriculum: Effects on negative career thoughts.	Excluded	Wrong Context - The article does not address strategic decisions in a business context.	Health
Drakaki, M., Tzionas, P., & Abeshev, K. (2020).	Investigating the influence of emotional intelligence on the supplier selection decisions with fuzzy cognitive maps.	Excluded	Wrong Publication Type	Conference Paper
Drucaroff, L. J., Kievit, R., Guinjoan, S. M., Gerschcovich, E. R., Cerquetti, D., Leiguarda, R., Cardinali, D. P., & Vigo, D. E. (2011).	Higher autonomic activation predicts better performance in Iowa gambling task.	Excluded	Wrong Context - The article does not address strategic decisions in a business context.	Health
du Preez, M. M., Kriek, H. S., & Albright, J. (2020)	Openness as moderator between feeling bored and managers' decision-making competence: A study of managers in the retail industry.	Excluded	Wrong Publication Type	Book Chapter
Duan, J., Gu, X., & Sun, L. (2016).	The influence of explicit self-esteem, implicit self-esteem and the discrepancies between them on advice taking.	Excluded	Wrong Context - The article does not address strategic decisions in a business context.	Decision / Emotion Theory
Dulov, E. (2021).	Evaluation of decision-making chains and their fractal dimensions.	Excluded	Wrong Context - The article does not address strategic decisions in a business context.	Social
Durieux, C. (2007).	The translating operation between reason and emotion.	Excluded	Wrong Context - The article does not address strategic decisions in a business context.	Decision / Emotion Theory
Dutour, M., Kirchhoff, A., Janssen, C., Meleze, S., Chevalier, H., Levy-Amon, S., Detrez, M. A., Piet, E., & Delory, T. (2021).	Family medicine practitioners' stress during the COVID-19 pandemic: A cross-sectional survey.	Excluded	Wrong Context - The article does not address strategic decisions in a business context.	Health
Ebner, S., Dörig, L., & Tirri, B. F. (2021).	Steps following the histologically assured diagnosis of breast cancer.	Excluded	Wrong Context - The article does not address strategic decisions in a business context.	Health
Ebrahimijam, S., Montazeri, M., Moein, S., Rasamfard, H., & Hosseini, M. (2009).	Analyzing the effect of developing emotional intelligence on soccer robot behaviors.	Excluded	Wrong Publication Type	Conference Paper
Eggen, C., Huber, O., Bär, A., Huber, O. W., Perrig, W. J., Muri, R., & Gutbrod, K. (2015).	Impairments in an early stage of the decision-making process in patients with ventromedial prefrontal damage: Preliminary results.	Excluded	Wrong Population + Wrong Context - The article does not address strategic decisions in a business context.	Health
Ehrbar, V., Urech, C., Rochlitz, C., Dällenbach, R. Z., Moffat, R., Stiller, R., Germeyer, A., Nawroth, F., Dangel, A., Findeklee, S., & Tschudin, S. (2019).	Randomized controlled trial on the effect of an online decision aid for young female cancer patients regarding fertility preservation.	Excluded	Wrong Context - The article does not address strategic decisions in a business context.	Health
Eisenberg, F. I. (2011).	"I could see colors again": How women end emotional abuse by accessing agency.	Excluded	Wrong Context - The article does not address strategic decisions in a business context.	Social
Eisenhardt, K. M. (1989).	Making fast strategic decisions in high-velocity environments.	Included	Included	Included
Ekerdt, D. J. (2020)	Downsizing: Confronting our possessions in later life.	Excluded	Wrong Publication Type + Wrong Context	Book / Social
Ekmekci, A. K., Teraman, S. B. S., & Acar, P. (2014).	Wisdom and management: A conceptual study on wisdom management.	Excluded	Wrong Publication Type	Conference Paper
El-Nasr, M. S., & Skubic, M. (1998).	A fuzzy emotional agent for decision-making in a mobile robot.	Excluded	Wrong Publication Type	Conference Paper
El-Nasr, M. S., Yen, J., & Ioerger, T. R. (2000).	FLAME: Fuzzy logic adaptive model of emotions.	Excluded	Wrong Context - The article does not address strategic decisions in a business context.	Decision / Emotion Theory
Elaydi, R. (2006).	Construct development and measurement of indecisiveness.	Excluded	Wrong Context - The article does not address strategic decisions in a business context.	social
Elaydi, R. (2006).	The development and testing of a nonconsequentialist model decision-making model.	Excluded	Wrong Context - The article does not address strategic decisions in a business context.	Decision / Emotion Theory
Elbanna, S. (2018).	The constructive aspect of political behavior in strategic decision-making: The role of diversity.	Excluded	Wrong Context - The article does not address strategic decisions in a business context.	Decision / Emotion Theory
Elkhalii-Wilhelm, S., Sippel, A., Riemann-Lorenz, K., Kofahl, C., Scheiderbauer, J., Arnade, S., Kleiter, I., Schmidt, S., & Heesen, C. (2022).	Experiences of persons with multiple sclerosis with lifestyle adjustment – A qualitative interview study.	Excluded	Wrong Context - The article does not address strategic decisions in a business context.	Health
Ellis, E. M., Kiviniemi, M. T., & Cook-Cottone, C. (2014).	Implicit affective associations predict snack choice for those with low, but not high levels of eating disorder symptomatology.	Excluded	Wrong Context - The article does not address strategic decisions in a business context.	Health
Ellis, R. D. (2021).	Emotional intelligence and decision-making in higher education administrators in post-secondary institutions in eastern Tennessee.	Excluded	Wrong Publication Type	Dissertation
Elwyn, G., & Miron-Shatz, T. (2010).	Deliberation before determination: The definition and evaluation of good decision making.	Excluded	Wrong Context - The article does not address strategic decisions in a business context.	Health
Elwyn, T. S. (2005).	Extreme mental and emotional disturbance.	Excluded	Wrong Context - The article does not address strategic decisions in a business context.	Health
Emmerling, R. J. (2004).	Cognitive and affective processes in career decision making: An integrative theory.	Excluded	Wrong Context - The article does not address strategic decisions in a business context.	Health
Emmerling, R. J., & Cherniss, C. (2003).	Emotional intelligence and the career choice process.	Excluded	Wrong Context - The article does not address strategic decisions in a business context.	Health
Endrizzi, C., Duglio, E., & Govoni, R. M. (2017).	Body language and metaphors revealed through applications of movement psychotherapy in a hospice: A clinical case of refractory pruritis.	Excluded	Wrong Context - The article does not address strategic decisions in a business context.	Health
Engebretson, J. C., Peterson, N. E., & Frenkel, M. (2014).	Exceptional patients: Narratives of connections.	Excluded	Wrong Context - The article does not address strategic decisions in a business context.	Health
Epstein, N. (2021).	Uncertain participant: Victim input and the black box of discretionary parole release.	Excluded	Wrong Context - The article does not address strategic decisions in a business context.	Social / Legal
Epstein, N. B., & Baucom, D. H. (2002).	Interventions for couple patterns and interactions.	Excluded	Wrong Context - The article does not address strategic decisions in a business context.	Social
Erickson, D. S. (2016).	Factors affecting clinician decision-making in in vitro fertilization.	Excluded	Wrong Context - The article does not address strategic decisions in a business context.	Health
Ericson, M. (2010).	Towards a sensed decision-making approach from deja vu to vu jade.	Included	Included	Included
Azouzi & Jarboui, 2013	CEO emotional intelligence and board of directors' efficiency	Included	Included	Included
Erim, Y., Beckmann, M., Valentin-Gamazo, C., Malago, M., Frilling, A., Schlaak, J. F., Gerken, G., Broelsch, C. E., & Senf, W. (2006).	Quality of life and psychiatric complications after adult living donor liver transplantation.	Excluded	Wrong Context - The article does not address strategic decisions in a business context.	Health
Esteban, P. G., & Insua, D. R. (2019).	A model for an affective non-expensive utility-based decision agent.	Excluded	Wrong Population + Wrong Context - The article does not address strategic decisions in a business context.	Social
Fabio, R. A., Romeo, V., & Calabrese, C. (2023).	Individual and situational factors influence cooperative choices in the decision-making process.	Included	Included	Included
Faerber, L. S., Ahrholdt, D. C., Schnittka, O., & Rezvani, Z. (2021).	Multimedia guides and word-of-mouth in nostalgic visitor attractions: The case for a German wax museum.	Excluded	Wrong Context - The article does not address strategic decisions in a business context.	Social
Fallbjörk, U., Frejeus, E., & Rasmussen, B. H. (2012).	A preliminary study into women's experiences of undergoing reconstructive surgery after breast cancer.	Excluded	Wrong Context - The article does not address strategic decisions in a business context.	Health
Fang, P., & Li, Y. (2005).	The underlying mechanism of emotion regulation affecting decision making process.	Excluded	Wrong Publication Type	Closed Access
Farano, A. (2020).	Emotions and adjudication theory: A first understanding.	Excluded	Wrong Context - The article does not address strategic decisions in a business context.	Decision / Emotion Theory
Farber, B. A., Berano, K. C., & Capobianco, J. A. (2006).	A temporal model of patient disclosure in psychotherapy.	Excluded	Wrong Context - The article does not address strategic decisions in a business context.	Health
Feijoo-Cid, M., Marañón, A. A., Huertas, A., Rivero-Santana, A., Cesar, C., Fink, V., Fernández-Cano, M. I., & Sued, O. (2023).	Exploring the decision-making process of people living with HIV enrolled in antiretroviral clinical trials: A qualitative study of decisions guided by trust and emotions.	Excluded	Wrong Context - The article does not address strategic decisions in a business context.	Health
Felton, A., Repper, J., & Avis, M. (2018).	Therapeutic relationships, risk, and mental health practice.	Excluded	Wrong Context - The article does not address strategic decisions in a business context.	Health
Femenia, N. (2000)	Emotional actor: Foreign policy decision making in the 1982 Falklands/Malvinas War.	Excluded	Wrong Publication Type + Wrong Context	Forum / Military
Fernandez, P. M. (2004).	Stories untold: The career development process for professional Puerto Rican females.	Excluded	Wrong Context - The article does not address strategic decisions in a business context.	Health
Fijen, A. P. M., & Marsden, M. G. (1992).	Green Point sewage disposal options.	Excluded	Wrong Context - The article does not address strategic decisions in a business context.	Social / Environmental
Fine, E. B. (2009).	Deconstructing the psychological components of emotional decision making and their relation to the suicide continuum.	Excluded	Wrong Context - The article does not address strategic decisions in a business context.	Health
Finlayson, C. S., Fu, M. R., Squires, A., Applebaum, A., Van Cleave, J., O'Cearbhaill, R., & DeRosa, A. P. (2019).	The experience of being aware of disease status in women with recurrent ovarian cancer: A phenomenological study.	Excluded	Wrong Context - The article does not address strategic decisions in a business context.	Health
Finlayson, E., Whiting, E. F., & Cutri, R. M. (2021).	‘Will this build me or break me?’: The embodied emotional work of a teacher candidate.	Excluded	Wrong Context - The article does not address strategic decisions in a business context.	Career / Education
Flannery, L., Peters, K., & Ramjan, L. M. (2020).	The differing perspectives of doctors and nurses in end-of-life decisions in the intensive care unit: A qualitative study.	Excluded	Wrong Context - The article does not address strategic decisions in a business context.	Health
Flannery, L., Ramjan, L. M., & Peters, K. (2016).	End-of-life decisions in the intensive care unit (ICU): Exploring the experiences of ICU nurses and doctors – A critical literature review.	Excluded	Wrong Context - The article does not address strategic decisions in a business context.	Health
Flores, H. R., Jiang, X. T., & Manz, C. C. (2018).	Intra-team conflict: The moderating effect of emotional self-leadership.	Included	Included	Included
Flugstad, K. D. (2002).	Decision-making in abortion: Men's experiences.	Excluded	Wrong Context - The article does not address strategic decisions in a business context.	Health
Fodor, O. C., Curseu, P. L., & Flestea, A. M. (2016).	Affective states and ecological rationality in entrepreneurial decision making.	Included	Included	Included
Fonooni, B., & IEEE Comp Soc. (2007).	Rational-emotional agent decision making algorithm design with OWA.	Excluded	Wrong Publication Type	Conference Paper
Forte, G., Morelli, M., & Casagrande, M. (2021).	Heart rate variability and decision-making: Autonomic responses in making decisions.	Excluded	Wrong Context - The article does not address strategic decisions in a business context.	Health
Fortuna, D. (1979).	Decision to change in the psychotherapy (based on insight).	Excluded	Wrong Context - The article does not address strategic decisions in a business context.	Health
Foshay, N., Taylor, A., & Mukherjee, A. (2014).	Winning the hearts and minds of business intelligence users: The role of metadata.	Excluded	Wrong Context - The article does not address strategic decisions in a business context.	Social
Fox, J. (2021).	Shared decision-making: An autoethnography about service user perspectives in making choices about mental health care and treatment.	Excluded	Wrong Context - The article does not address strategic decisions in a business context.	Health
Franke, H., & Foerstl, K. (2020).	Goals, conflict, politics, and performance of cross-functional sourcing teams: Results from a social team experiment.	Included	Included	Included
Fraser, R. L. (2014).	The impact of context on responses to episodes of incivility.	Excluded	Wrong Context - The article does not address strategic decisions in a business context.	Social
Freimuth, V. S., Jamison, A., Hancock, G., Musa, D., Hilyard, K., & Quinn, S. C. (2017).	The role of risk perception in flu vaccine behavior among African-American and white adults in the United States.	Excluded	Wrong Context - The article does not address strategic decisions in a business context.	Health
Friedman, C. M., Greenspan, R., & Mittleman, F. (1974).	The decision-making process and the outcome of therapeutic abortion.	Excluded	Wrong Context - The article does not address strategic decisions in a business context.	Health / Social
Frischenschlager, O. (2008).	Das Affektgeschehen als Schaltstelle zwischen psychischer und psychosomatischer Symptomatik. [Disturbance of affect is the switch stand of psychic and psychosomatic symptoms.].	Excluded	Wrong Context - The article does not address strategic decisions in a business context.	Health
Fritsche, I., Barth, M., Jugert, P., Masson, T., & Reese, G. (2018).	A social identity model of pro-environmental action (SIMPEA).	Excluded	Wrong Context - The article does not address strategic decisions in a business context.	Health
Fritzsche, K. (2011).	Bedarf und inanspruchnahme psychosomatischer konsil- und liaisonleistungen. [Need and use of psychosomatic liaison services.].	Excluded	Wrong Context - The article does not address strategic decisions in a business context.	Health
Fritzsche, K., Spahn, C., NueBling, M., & Wirsching, M. (2007).	Need for and use of a university clinic mental health liaison service.	Excluded	Wrong Context - The article does not address strategic decisions in a business context.	Health
Fu, J. L., Zhang, J. M., & Li, X. H. (2023).	How do risks and benefits affect users' privacy decisions? An event-related potential study on privacy calculus process.	Excluded	Wrong Context - The article does not address strategic decisions in a business context.	Social
Fu, X. M. (2021).	A novel perspective to enhance the role of TPB in predicting green travel: The moderation of affective-cognitive congruence of attitudes.	Excluded	Wrong Context - The article does not address strategic decisions in a business context.	Social
Fudge, J. L., & Ciccone, J. R. (2019).	Defense experts for indigent defendants.	Excluded	Wrong Context - The article does not address strategic decisions in a business context.	Health
Fuscaldo, G., Russell, S., & Gillam, L. (2007).	How to facilitate decisions about surplus embryos: Patients' views.	Excluded	Wrong Context - The article does not address strategic decisions in a business context.	Health
Gabay, A. S., Radua, J., Kempton, M. J., & Mehta, M. A. (2014).	The ultimatum game and the brain: A meta-analysis of neuroimaging studies.	Excluded	Wrong Context - The article does not address strategic decisions in a business context.	Decision / Emotion Theory
Gadassi, R., Gati, I., & Dayan, A. (2012).	The adaptability of career decision-making profiles.	Excluded	Wrong Context - The article does not address strategic decisions in a business context.	Health
Gadassi, R., Gati, I., & Wagman-Rolnick, H. (2013).	The adaptability of career decision-making profiles: Associations with self-efficacy, emotional difficulties, and decision status.	Excluded	Wrong Context - The article does not address strategic decisions in a business context.	Health
Galliott, J. (2015)	Military robotics and emotion: Challenges to just war theory.	Excluded	Wrong Publication Type	Book
Galotti, K. M. (1995).	Memories of a decision-map: Recall of a real-life decision.	Excluded	Wrong Context - The article does not address strategic decisions in a business context.	Decision / Emotion Theory
Camero, N., González-Romá, V., & Peiró, J. M. (2008).	The influence of intra-team conflict on work teams' affective climate: A longitudinal study.	Included	Included	Included
Garcia, V. (2006).	The influence of acculturation on the power dynamics among professional Mexican-American married women.	Excluded	Wrong Context - The article does not address strategic decisions in a business context.	Social
Gardino, S. L., Jeruss, J. S., & Woodruff, T. K. (2010).	Using decision trees to enhance interdisciplinary team work: The case of oncofertility.	Excluded	Wrong Context - The article does not address strategic decisions in a business context.	Health
Garris Jr., W. R. (2002).	What influences patients to change? A qualitative exploration of health decision-making factors among diabetes patients.	Excluded	Wrong Context - The article does not address strategic decisions in a business context.	Health
Garrouste-Orgeas, M., Timsit, J. F., Montuclard, L., Colvez, A., Gattolliat, O., Philippart, F., Rigal, G., Misset, B., & Carlet, J. (2006).	Decision-making process, outcome, and 1-year quality of life of octogenarians referred for intensive care unit admission.	Excluded	Wrong Context - The article does not address strategic decisions in a business context.	Health
Gascoigne, P., Mason, M. D., & Roberts, E. (1999).	Factors affecting presentation and delay in patients with testicular cancer: Results of a qualitative study.	Excluded	Wrong Context - The article does not address strategic decisions in a business context.	Health
Gati, I., Gadassi, R., Saka, N., Hadadi, Y., Ansenberg, N., Friedmann, R., & Asulin-Peretz, L. (2011).	Emotional and personality-related aspects of career decision-making difficulties: Facets of career indecisiveness.	Excluded	Wrong Context - The article does not address strategic decisions in a business context.	Health
Gaudine, A., & Thorne, L. (2001).	Emotion and ethical decision-making in organizations.	Included	Included	Included
Gaudou, B., Lorini, E., & Mayor, E. (2014).	Moral guilt: An agent-based model analysis.	Excluded	Wrong Publication Type	Conference Paper
Geiger, P. J. (2018).	Testing a values-based approach to healthcare decision making in older adults.	Excluded	Wrong Context - The article does not address strategic decisions in a business context.	Health
Georges, J. J., The, A. M., Onwuteaka-Philipsen, B. D., & Van der Wal, G. (2008).	Dealing with requests for euthanasia: A qualitative study investigating the experience of general practitioners.	Excluded	Wrong Context - The article does not address strategic decisions in a business context.	Health
Georges, L. C., Wiener, R. L., & Keller, S. R. (2013).	The angry juror: Sentencing decisions in first-degree murder.	Excluded	Wrong Context - The article does not address strategic decisions in a business context.	Social / Legal
Gharib, A., Mier, D., Adolphs, R., & Shimojo, S. (2015).	Eyetracking of social preference choices reveals normal but faster processing in autism.	Excluded	Wrong Context - The article does not address strategic decisions in a business context.	Health
Gibson, A., Cooper, M., Rae, J., & Hayes, J. (2020).	Clients' experiences of shared decision making in an integrative psychotherapy for depression.	Excluded	Wrong Context - The article does not address strategic decisions in a business context.	Health
Gigalová, V. (2017).	The role of knowledge in the intuitive decision-making of managers.	Excluded	Wrong Publication Type	Conference Paper
Gill, P. (2012).	Stressors and coping mechanisms in live-related renal transplantation.	Excluded	Wrong Context - The article does not address strategic decisions in a business context.	Health
Gill, P., Tompson, L., Marchment, Z., Hetzel, F., Zolghadriha, S., & Sidebottom, A. (2020).	A configurative synthesis of evidence for fear in the criminal decision-making process.	Excluded	Wrong Context - The article does not address strategic decisions in a business context.	Legal
Gjerberg, E., Lillemoen, L., Forde, R., & Pedersen, R. (2015).	End-of-life care communications and shared decision-making in Norwegian nursing homes: Experiences and perspectives of patients and relatives.	Excluded	Wrong Context - The article does not address strategic decisions in a business context.	Health
Gledhill, A., Ahmed, O. H., & Forsdyke, D. (2020)	Effectively managing anterior cruciate ligament injury and return to performance in elite women's soccer.	Excluded	Wrong Context - The article does not address strategic decisions in a business context.	Health / Sports
Glenn, J. E. (2019).	A qualitative study: An exploration of the use of emotional intelligence by military leaders in their decision-making process.	Excluded	Wrong Context - The article does not address strategic decisions in a business context.	Military
Glicker, J. L. (1992).	Convincing the public that drinking-water is safe.	Excluded	Wrong Context - The article does not address strategic decisions in a business context.	Health
Goldman, H. H., Porcino, J., Divita, G., Zirikly, A., Desmet, B., Sacco, M., Marfeo, E., McDonough, C., Rasch, E., & Chan, L. (2023).	Informatics research on mental health functioning: Decision support for the Social Security Administration disability program.	Excluded	Wrong Context - The article does not address strategic decisions in a business context.	Health
Göloglu, C., & Zurnaci, E. (2016).	An approach for handling individual customer preferences and emotional needs – Yielding 3D product assembly generation.	Excluded	Wrong Context - The article does not address strategic decisions in a business context.	Social
Gomes, B. D., Dowd, O. P., & Sethares, K. A. (2019).	Attitudes of community hospital critical care nurses toward family-witnessed resuscitation.	Excluded	Wrong Context - The article does not address strategic decisions in a business context.	Health
Gomolka, E. G. (1990).	Decisional deprivation and its linkages: A study of MBA program directors.	Excluded	Wrong Context - The article does not address strategic decisions in a business context.	Career / Education
Goncalves, M. B., Anastasiadou, M., & Santos, V. (2022).	AI and public contests: A model to improve the evaluation and selection of public contest candidates in the Police Force.	Excluded	Wrong Context - The article does not address strategic decisions in a business context.	Social
Gong, X. J., Huskey, R., Eden, A., & Ulusoy, E. (2023).	Computationally modeling mood management theory: A drift-diffusion model of people's preferential choice for valence and arousal in media.	Excluded	Wrong Context - The article does not address strategic decisions in a business context.	Social
Gong, X. M., Shen, H. Z., & Han, X. (2018).	Influence of emotion and cognitive demand on frame effect in crisis decision-making.	Excluded	Wrong Context - The article does not address strategic decisions in a business context.	Social
Good, M. (2020).	How witnesses experience decision making in situations of workplace bullying: An interpretative phenomenological analysis.	Excluded	Wrong Context - The article does not address strategic decisions in a business context.	Social
Goodman, P. (2004).	A test of a model of care seeking in military women.	Excluded	Wrong Context - The article does not address strategic decisions in a business context.	Health
Goodwin, J. T. (2022).	The role of guided intuition in the executive decision-making process of small business owners.	Excluded	Wrong Publication Type	Dissertation
Gordon, C., & Arian, A. (2001).	Threat and decision making.	Excluded	Wrong Context - The article does not address strategic decisions in a business context.	Decision / Emotion Theory
Gordon, M. (2006).	Ethical and clinical issues in cardiopulmonary resuscitation (CPR) in the frail elderly with dementia: A Jewish perspective.	Excluded	Wrong Context - The article does not address strategic decisions in a business context.	Health
Gorini, A., Mazzocco, K., & Pravettoni, G. (2015).	Decision-making process related to participation in phase I clinical trials: A nonsystematic review of the existing evidence.	Excluded	Wrong Context - The article does not address strategic decisions in a business context.	Health
Görür, O. C., Rosman, B., Sivrikaya, F., Albayrak, S., & Assoc Comp Machinery. (2018).	Social cobots: Anticipatory decision-making for collaborative robots incorporating unexpected human behaviors.	Excluded	Wrong Publication Type	Conference Paper
Gottert, A., Jacquin, K., Rahaivondrafahitra, B., Moracco, K., & Maman, S. (2015).	Influences on women's decision making about intrauterine device use in Madagascar.	Excluded	Wrong Context - The article does not address strategic decisions in a business context.	Health
Gould, D. J., Dowsey, M. M., Glanville-Hearst, M., Spelman, T., Bailey, J. A., Choong, P. F. M., & Bunzli, S. (2023).	Patients' views on AI for risk prediction in shared decision-making for knee replacement surgery: Qualitative interview study.	Excluded	Wrong Context - The article does not address strategic decisions in a business context.	Health
Gratch, J., Marsella, S., & Thagard, P. (2004).	A domain-independent framework for modeling emotion.	Excluded	Wrong Context - The article does not address strategic decisions in a business context.	Health
Graven, L. J., & Grant, J. S. (2014).	Social support and self-care behaviors in individuals with heart failure: An integrative review.	Excluded	Wrong Context - The article does not address strategic decisions in a business context.	Health
Graziottin, A. (2005).	The woman patient after WHI.	Excluded	Wrong Context - The article does not address strategic decisions in a business context.	Health
Green, R., Shelly, C., Gibb, J., & Walker, T. (2018).	Implementing seclusion in forensic mental health care: A qualitative study of staff decision making.	Excluded	Wrong Context - The article does not address strategic decisions in a business context.	Health
Greener, J. R. (2016).	Contralateral prophylactic mastectomy: An exploratory approach to understanding the decision-making process.	Excluded	Wrong Context - The article does not address strategic decisions in a business context.	Health
Greener, J. R., Bass, S. B., & Lepore, S. J. (2018).	Contralateral prophylactic mastectomy: A qualitative approach to exploring the decision-making process.	Excluded	Wrong Context - The article does not address strategic decisions in a business context.	Health
Greer, L. L., Jehn, K. A., & Mannix, E. A. (2008).	Conflict transformation – A longitudinal investigation of the relationships between different types of intragroup conflict and the moderating role of conflict resolution.	Excluded	Wrong Context - The article does not address strategic decisions in a business context.	social
Gregersen, T. A., Birkelund, R., Wolderslund, M., Steffensen, K. D., & Ammentorp, J. (2022).	Patients' experiences of the decision-making process for clinical trial participation.	Excluded	Wrong Context - The article does not address strategic decisions in a business context.	Health
Gregory, M. E., Sonesh, S. C., Feitosa, J., Benishek, L. E., Hughes, A. M., & Salas, E. (2017).	Decision making on the labor and delivery unit: An investigation of influencing factors.	Excluded	Wrong Context - The article does not address strategic decisions in a business context.	Health
Grémy, F. (2008).	Ethical and philosophical dimensions of decision-making in public health.	Excluded	Wrong Context - The article does not address strategic decisions in a business context.	Health
Griessler, E. (2007).	"Policy learning" within the Austrian socialist party: Internal party dynamics during the decision-making process on the limited-period abortion regulation.	Excluded	Wrong Context - The article does not address strategic decisions in a business context.	Health
Griffin, V. W., Wentz, E., & Meinert, E. (2022).	Explaining the why in #WhyIDidntReport: An examination of common barriers to formal disclosure of sexual assault in college students.	Excluded	Wrong Context - The article does not address strategic decisions in a business context.	Career / Education
Griffith, W. (1999).	The reflecting team as an alternative case teaching model: A narrative, conversational approach.	Excluded	Wrong Context - The article does not address strategic decisions in a business context.	Career / Education
Grinhauz, A. S., Azzara, S. H., Otamendi, A. M., & Azzollini, S. C. (2020).	La toma de decisiones de rescatistas y la efectividad en la primera ayuda psicológica. [The decision making of the rescuers and effectiveness in the first psychological aid.].	Excluded	Wrong Context - The article does not address strategic decisions in a business context.	Health
Grinhauz, A. S., Azzara, S. H., Otamendi, A. M., & Azzollini, S. C. (2020).	The decision making of the rescuers and effectiveness in the first psychological aid.	Excluded	Wrong Context - The article does not address strategic decisions in a business context.	Health
Grinnell, L. D. (2009).	A qualitative exploration of reflective thinking in experiential learning debriefings.	Excluded	Wrong Context - The article does not address strategic decisions in a business context.	Career / Education
Gross, D., & Gross, C. (2005).	Impact of an electronic meeting system on the group decision-making process.	Excluded	Wrong Context - The article does not address strategic decisions in a business context.	Social
Gruehn, D., & Sharifian, N. (2021).	Lists of emotional stimuli.	Excluded	Wrong Context - The article does not address strategic decisions in a business context.	Decision / Emotion Theory
Gunn, C. M., Bokhour, B. G., Parker, V. A., Battaglia, T. A., Parker, P. A., Fagerlin, A., McCaskill-Stevens, W., Bandos, H., Blakeslee, S. B., & Holmberg, C. (2019).	Understanding decision making about breast cancer prevention in action: The intersection of perceived risk, perceived control, and social context: NRG Oncology/NSABP DMP-1.	Excluded	Wrong Context - The article does not address strategic decisions in a business context.	Health
Günül, A. S. (2006).	Where is human morality? Is it in brain or heart?	Excluded	Wrong Publication Type	Conference Paper
Guo, J. (2020).	Exploring public relations practitioners' ethical decision-making at work: A whole-person, processual, and contextual lens.	Excluded	Wrong Context - The article does not address strategic decisions in a business context.	Studies not focused on emotions and the strategic decision-making process
Guo, X. C., Zeng, D. L., & Wang, Y. J. (2023).	A semiparametric inverse reinforcement learning approach to characterize decision making for mental disorders.	Excluded	Wrong Context - The article does not address strategic decisions in a business context.	Health
Gurm, B. K., Stephen, J., MacKenzie, G., Doll, R., Barroetavena, M. C., & Cadell, S. (2008).	Understanding Canadian Punjabi-speaking South Asian women's experience of breast cancer: A qualitative study.	Excluded	Wrong Context - The article does not address strategic decisions in a business context.	Health
Haag, C., & Getz, I. (2016).	The inboard emotional contagion model.	Excluded	Wrong Publication Type	Conference Paper
Habersack, M., & Luschin, G. (2013).	Insecurities of women regarding breast cancer research: A qualitative study.	Excluded	Wrong Context - The article does not address strategic decisions in a business context.	Health
Hajdarevic, S., Schmitt-Egenolf, M., Brulin, C., Sundbom, E., & Hörnsten, A. (2011).	Malignant melanoma: Gender patterns in care seeking for suspect marks.	Excluded	Wrong Context - The article does not address strategic decisions in a business context.	Health
Hajiheydari, N., Maskan, B. H. H., Ashkani, M., & IEEE. (2017).	Sustainable internet service provider selection: Affected by internal and external factors (quality and reputation).	Excluded	Wrong Publication Type	Conference Paper
Hajnalka, S. M., & Bernadette, P. (2014).	Decision making for termination of pregnancies and the pre-abortion period in the context of women's mental health.	Excluded	Wrong Context - The article does not address strategic decisions in a business context.	Health
Halfmann, K., Hedgcock, W., Bechara, A., & Denburg, N. L. (2014).	Functional neuroimaging of the Iowa gambling task in older adults.	Excluded	Wrong Context - The article does not address strategic decisions in a business context.	Health
Halverson, C. M. E., Wang, J. Y., Poulson, M., Karlin, J., Crowley-Matoka, M., & Ross, L. F. (2016).	Living kidney donors who develop kidney failure: Excerpts of their thoughts.	Excluded	Wrong Context - The article does not address strategic decisions in a business context.	Health
Hamill, R., Carson, S., & Dorahy, M. (2010).	Experiences of psychosocial adjustment within 18 months of amputation: An interpretative phenomenological analysis.	Excluded	Wrong Context - The article does not address strategic decisions in a business context.	Health
Hamilton, J. E., Srivastava, D., Womack, D., Brown, A., Schulz, B., Macakanja, A., Walker, A., Wu, M.-J., Williamson, M., & Cho, R. Y. (2019).	Treatment retention among patients participating in coordinated specialty care for first-episode psychosis: A mixed-methods analysis.	Excluded	Wrong Context - The article does not address strategic decisions in a business context.	Health
Hammond, M. S., Lockman, J. D., & Boling, T. (2010).	A test of the tripartite model of career indecision of Brown and Krane for African Americans incorporating emotional intelligence and positive affect.	Excluded	Wrong Context - The article does not address strategic decisions in a business context.	Health
Han, K., Kim, M. Y., Sohn, Y. W., & Kim, Y.-H. (2021).	The effect of suppressing guilt and shame on the immoral decision-making process.	Excluded	Wrong Context - The article does not address strategic decisions in a business context.	Decision / Emotion Theory
Harbour, M., & Kisfalvi, V. (2014).	In the eye of the beholder: An exploration of managerial courage.	Included	Included	Included
Harlé, K. M., Shenoy, P., & Paulus, M. P. (2013).	The influence of emotions on cognitive control: Feelings and beliefs – Where do they meet?	Excluded	Wrong Context - The article does not address strategic decisions in a business context.	Decision / Emotion Theory
Harriott, V. A. (2021).	Struggle and strength: How religious/spiritual beliefs relate to women's well-being after pregnancy decisions.	Excluded	Wrong Context - The article does not address strategic decisions in a business context.	Social
Harris, W. R. (2019).	The influence of spiritual and emotional intelligence on romantic relationships of African Americans.	Excluded	Wrong Context - The article does not address strategic decisions in a business context.	Social
Hartwig, M., Bhat, A., & Peters, A. (2022).	How stress can change our deepest preferences: Stress habituation explained using the free energy principle.	Excluded	Wrong Context - The article does not address strategic decisions in a business context.	Social
Hasegawa, T., Nishikawa, K., Tamura, Y., Oka, T., Urawa, A., Watanabe, S., Mizuno, S., & Okada, M. (2021).	Impacts of interaction of mental condition and quality of life between donors and recipients at decision-making of preemptive and post-dialysis living-donor kidney transplantation.	Excluded	Wrong Context - The article does not address strategic decisions in a business context.	Health
Hashim, S. M., Idris, I. B., Sharip, S., Bahari, R., & Jahan, N. (2021).	Understanding the turning point of patients with diabetes.	Excluded	Wrong Context - The article does not address strategic decisions in a business context.	Health
Haugom, E. W., Benth, J., Stensrud, B., Ruud, T., Clausen, T., & Landheim, A. S. (2023).	Shared decision making and associated factors among patients with psychotic disorders: A cross-sectional study.	Excluded	Wrong Context - The article does not address strategic decisions in a business context.	Health
Hayes, R. P., Bowman, L., Monahan, P. O., Marrero, D. G., & McHorney, C. A. (2006).	Understanding diabetes medications from the perspective of patients with type 2 diabetes: Prerequisite to medication concordance.	Excluded	Wrong Context - The article does not address strategic decisions in a business context.	Health
He, Q., Sun, Q. Z., Shi, Z. L., Zhang, X. N., & Hu, F. P. (2018).	Effect of social distance on outcome evaluation in self-other decision-making: Evidence from event-related potentials.	Excluded	Wrong Context - The article does not address strategic decisions in a business context.	Health
Heekeren, H. R., Wartenburger, I., Schmidt, H., Prehn, K., Schwintowski, H. P., & Villringer, A. (2005).	Influence of bodily harm on neural correlates of semantic and moral decision-making.	Excluded	Wrong Context - The article does not address strategic decisions in a business context.	Health
Heerdink, M. W., Van Kleef, G. A., Homan, A. C., & Fischer, A. H. (2013).	On the social influence of emotions in groups: Interpersonal effects of anger and happiness on conformity versus deviance.	Excluded	Wrong Context - The article does not address strategic decisions in a business context.	Social
Heilbrun, K., Marczyk, G., DeMatteo, D., & Mack-Allen, J. (2007)	A principles-based approach to forensic mental health assessment: Utility and update.	Excluded	Wrong Publication Type + Wrong Context	Chapter / Health
Hendriks, Y., Peek, S., Kaptein, M., & Bongers, I. (2022).	Process and information needs when searching for and selecting apps for smoking cessation: Qualitative study using contextual inquiry.	Excluded	Wrong Context - The article does not address strategic decisions in a business context.	Health / Social
Henriques, V., Anes, A., & Sardo, D. (2014).	Learning and innovation: A study on the perception of the student in a clinical learning environment.	Excluded	Wrong Publication Type	Health
Henry, J. (2013).	Return or relocate? An inductive analysis of decision-making in a disaster.	Excluded	Wrong Context - The article does not address strategic decisions in a business context.	Decision / Emotion Theory
Heradstveit, S. H., Larsen, M. H., Solberg, M. T., & Steindal, S. A. (2023).	Critical care nurses' role in the decision-making process of withdrawal of life-sustaining treatment: A qualitative systematic review.	Excluded	Wrong Context - The article does not address strategic decisions in a business context.	Health
Herman, A. M., Esposito, G., & Tsakiris, M. (2021).	Body in the face of uncertainty: The role of autonomic arousal and interoception in decision-making under risk and ambiguity.	Excluded	Wrong Context - The article does not address strategic decisions in a business context.	Health
Hernández-Marrero, P., Pereira, S. M., & Carvalho, A. S. (2016).	Ethical decisions in palliative care: Interprofessional relations as a burnout protective factor? Results from a mixed-methods multicenter study in Portugal.	Excluded	Wrong Context - The article does not address strategic decisions in a business context.	Health
Hernandez, P. I. L., Alvarez, H. R. P., Noygues, C. S. B., & Garcia, A. R. (2015).	Por qué las mujeres mastectomizadas no recurren a la reconstrucción mamaria en el sistema de seguridad social? [Why mastectomized women do not resort to breast reconstruction in Mexico's Social Security system?].	Excluded	Wrong Context - The article does not address strategic decisions in a business context.	Health
Herrera, D., & Bennadji, A. (2013).	A risk based methodology to assess the energy efficiency improvements in traditionally constructed buildings.	Excluded	Wrong Publication Type	Conference Paper
Hershberger, P. E., & Pierce, P. F. (2010).	Conceptualizing couples' decision making in PGD: Emerging cognitive, emotional, and moral dimensions.	Excluded	Wrong Context - The article does not address strategic decisions in a business context.	Social
Heruatmadja, C. H., & Ramadhan, A. (2023).	Drivers and barriers of intention to work within metaverse environment.	Excluded	Wrong Context - The article does not address strategic decisions in a business context.	Social
Hess, J. D., & Bacigalupo, A. C. (2011).	Enhancing decisions and decision-making processes through the application of emotional intelligence skills.	Included	Included	Included
Hess, T. R., & Tracey, T. J. G. (2013).	Psychological help-seeking intention among college students across three problem areas.	Excluded	Wrong Context - The article does not address strategic decisions in a business context.	Social
Highhouse, S. (2002).	Judgment and decision-making research: Relevance to industrial and organizational psychology.	Excluded	Wrong Publication Type	Book Chapter
Hill, M., Glaser, K., & Harden, J. (1998).	A feminist model for ethical decision making.	Excluded	Wrong Context - The article does not address strategic decisions in a business context.	Social
Hiller, N. J., & Hambrick, D. C. (2005).	Conceptualizing executive hubris: The role of (hyper-) core self-evaluations in strategic decision-making.	Included	Included	Included
Hine, D. W. (1996).	Decision making in commons dilemmas: A grounded theory analysis.	Excluded	Wrong Publication Type	Dissertation
Hjerto, K. B., & Kuvaas, B. (2009).	Development and empirical exploration of an extended model of intra-group conflict.	Excluded	Wrong Context - The article does not address strategic decisions in a business context.	Social
Ho, Z. J. M., Radha Krishna, L. K., & Yee, C. P. (2010).	Chinese familial tradition and Western influence: A case study in Singapore on decision making at the end of life.	Excluded	Wrong Context - The article does not address strategic decisions in a business context.	Health
Hodges, V., Hynes, C., Lassa, S., & Mitchell, C. (2021).	Support needs of carers making proxy healthcare decisions for people with dementia: A systematic review based on the Noblit and Hare meta-ethnographic synthesis of qualitative studies.	Excluded	Wrong Context - The article does not address strategic decisions in a business context.	Health
Holley, A. M. (2017).	The relationship between counseling session rates (premature termination, completed, no-show), depression, anxiety, alcohol use, and gender in university counseling center students.	Excluded	Wrong Context - The article does not address strategic decisions in a business context.	Health
Holliday-Okumu, A. (2019).	To muddy death: How clinicians' perceptions of laws and ethics inform treatment of suicidal clients.	Excluded	Wrong Context - The article does not address strategic decisions in a business context.	Health
Hollings, J. (2013).	Let the story go: The role of emotion in the decision-making process of the reluctant, vulnerable witness or whistle-blower.	Excluded	Wrong Context - The article does not address strategic decisions in a business context.	Studies not focused on emotions and the strategic decision-making process
Holmgren, A. G., Juth, N., Lindblad, A., & Vogelsang, A. C. (2022).	Nurses' experiences of using restraint in neurosurgical care: A qualitative interview study.	Excluded	Wrong Context - The article does not address strategic decisions in a business context.	Health
Holten, L., van der Wolf, R., & van der Pijl, M. S. G. (2023).	The difficult process of autonomous choice: Using I-poems to understand experiences of abortion-seekers in The Netherlands.	Excluded	Wrong Context - The article does not address strategic decisions in a business context.	Health / Social
Hopwood, M. (2020).	The shared decision-making process in the pharmacological management of depression.	Excluded	Wrong Context - The article does not address strategic decisions in a business context.	Health
Horcea-Milcu, A. I., Zaman, S., Filyushkina, A., López-Rodríguez, M. D., Cebrián-Piqueras, M. A., & Raymond, C. M. (2022).	The relationship between values and knowledge in visioning for landscape management: Relevance for a collaborative approach.	Excluded	Wrong Context - The article does not address strategic decisions in a business context.	Decision / Emotion Theory
Hov, R., Hedelin, B., & Athlin, E. (2007).	Response to Hov R, Hedelin B, Athlin E (2007) Being an intensive care nurse related to questions of withholding or withdrawing curative treatment. Reply.	Excluded	Wrong Context - The article does not address strategic decisions in a business context.	Health
Howard, A. F., Balneaves, L. G., Bottorff, J. L., & Rodney, P. (2011).	Preserving the self: The process of decision making about hereditary breast cancer and ovarian cancer risk reduction.	Excluded	Wrong Context - The article does not address strategic decisions in a business context.	Health
Huang, H. (2015).	Decision-making and motor control: Computational models of human sensorimotor processing.	Excluded	Wrong Context - The article does not address strategic decisions in a business context.	Health
Huang, J. Y., Qi, H. O., Zhu, Y. T., & Zhang, M. Y. (2022).	Factors influencing the initiative behavior of intensive care unit nurses toward end-of-life decision making: A cross-sectional study.	Excluded	Wrong Context - The article does not address strategic decisions in a business context.	Health
Huang, L. T., Leu, J. D., & IEEE. (2020).	Relative importance of determinants towards users' privacy disclosure on social network sites by privacy invasion experience based on construal level theory.	Excluded	Wrong Publication Type	Conference Paper
Huang, R. T., Jabor, M. K., Tang, T. W., & Chang, S. C. (2022).	Examine the moderating role of mobile technology anxiety in mobile learning: A modified model of goal-directed behavior.	Excluded	Wrong Context - The article does not address strategic decisions in a business context.	Social
Huang, Y. X., Li, H. X., Yang, Y. L., Wang, J., & Jansz, J. (2021).	Event-related potential sensing analysis on the risk perception and decision-making by grassroots managers in different fatigue states.	Excluded	Wrong Context - The article does not address strategic decisions in a business context.	Studies not focused on emotions and the strategic decision-making process
Hung, Y. T., Wu, C. F., Liang, T. H., Chou, S. S., Chen, G. L., Wu, P. N., Su, G. R., Jang, T. H., Liu, C. Y., Wang, C. Y., Tseng, L. M., & Sheu, S. J. (2019).	Developing a decision-aid website for breast cancer surgery: An action research approach.	Excluded	Wrong Context - The article does not address strategic decisions in a business context.	Health
Hunt, L. A., Mcgee, P., Gutteridge, R., & Hughes, M. (2016).	Failing securely: The processes and support which underpin English nurse mentors' assessment decisions regarding under-performing students.	Excluded	Wrong Context - The article does not address strategic decisions in a business context.	Health
Hurt, K. J. (2014).	Assessing the impact of conflict-type on decision-effectiveness in top management teams: The moderating effect of attributions, emotions, conflict-handling behavior, and the environment.	Excluded	Wrong Publication Type	Dissertation
Hurtado, F., Gómez, M., & Donat, F. (2007).	Transexualismo y salud mental. [Transsexualism and mental health.].	Excluded	Wrong Context - The article does not address strategic decisions in a business context.	Health
Ibisler, A., Ocklenburg, S., Stemmler, S., Arning, L., Epplen, J. T., Saft, C., & Hoffjan, S. (2017).	Prospective evaluation of predictive DNA testing for Huntington's disease in a large German center.	Excluded	Wrong Context - The article does not address strategic decisions in a business context.	Health
Idan, L. (2022).	Beyond purchase intentions: Mining behavioral intentions of social-network users.	Excluded	Wrong Context - The article does not address strategic decisions in a business context.	Social
Ihrig, A., Hanslmeier, T., Grüllich, C., Zschäbitz, S., Huber, J., Greinacher, A., Sauer, C., Friederich, H. C., & Maatouk, I. (2022).	Couples coping with advanced prostate cancer: An explorative study on treatment decision making, mental deterioration, partnership, and psychological burden.	Excluded	Wrong Context - The article does not address strategic decisions in a business context.	Health
Iinuma, K., & Kogiso, K. (2021).	Emotion-involved human decision-making model.	Excluded	Wrong Context - The article does not address strategic decisions in a business context.	Social
Ilori, M. O., & Irefin, I. A. (1997).	Technology decision making in organizations.	Included	Included	Included
Inagaki, N., Seto, N., Lee, K., Takahashi, Y., Nakayama, T., & Hayashi, Y. (2023).	The role of critical care nurses in shared decision-making for patients with severe heart failure: A qualitative study.	Excluded	Wrong Context - The article does not address strategic decisions in a business context.	Health
Isen, A. M., & Means, B. (1983).	The influence of positive affect on decision-making strategy.	Excluded	Wrong Context - The article does not address strategic decisions in a business context.	Decision / Emotion Theory
Ishii, A., Tanaka, M., & Watanabe, Y. (2014)	The neural mechanisms underlying the decision to rest in the presence of fatigue: A magnetoencephalography study.	Excluded	Wrong Context - The article does not address strategic decisions in a business context.	Health
Ismail, H., Serhani, M. A., Hussien, N., Elabyad, R., & Navaz, A. (2022).	Public wellbeing analytics framework using social media chatter data.	Excluded	Wrong Context - The article does not address strategic decisions in a business context.	Social
Ismail, K. M., Richard, O. C., & Taylor, E. C. (2012).	Relationship conflict in supervisor-subordinate dyads: A subordinate perspective.	Excluded	Wrong Context - The article does not address strategic decisions in a business context.	Studies not focused on emotions and the strategic decision-making process
Jacobs, J. E., Van de Lisdonk, E. H., Smeele, I., Van Weel, C., & Grol, R. P. T. M. (2001).	Management of patients with asthma and COPD: Monitoring quality of life and the relationship to subsequent GP interventions.	Excluded	Wrong Context - The article does not address strategic decisions in a business context.	Health
JanardhanIyengar, S. M., Srinivasan, R., Venkateshmurthy, B. M., Katari, Y., & Hiremathada, S. (2019).	Family satisfaction in a medical college multidisciplinary intensive care unit: How can we improve?	Excluded	Wrong Context - The article does not address strategic decisions in a business context.	Health
Jannack, A., Münster, S., & Noennig, J. R. (2015).	Enabling massive participation: Blueprint for a collaborative urban design environment.	Excluded	Wrong Publication Type	Conference Paper
Janssen, E., Van Osch, L., De Vries, H., & Lechner, L. (2013).	Examining direct and indirect pathways to health behavior: The influence of cognitive and affective probability beliefs.	Excluded	Wrong Context - The article does not address strategic decisions in a business context.	Health
Jay, A. C. V. (2021).	The role of perceived warmth and competence in civil trials with corporate litigants.	Excluded	Wrong Context - The article does not address strategic decisions in a business context.	Social / Legal
Jayadevappa, R., Schwartz, J. S., Chhatre, S., Wein, A. J., & Malkowicz, S. B. (2010).	Association between utility and treatment among patients with prostate cancer.	Excluded	Wrong Context - The article does not address strategic decisions in a business context.	Health
Jayakumar, P., & Bozic, K. J. (2020).	Advanced decision-making using patient-reported outcome measures in total joint replacement.	Excluded	Wrong Context - The article does not address strategic decisions in a business context.	Health
Jehn, K. A. (1994).	Enhancing effectiveness: An investigation of advantages and disadvantages of value-based intragroup conflict.	Excluded	Wrong Context - The article does not address strategic decisions in a business context.	Social
Jehn, K. A. (1997).	Qualitative analysis of conflict types and dimensions in organizational groups.	Excluded	Wrong Context - The article does not address strategic decisions in a business context.	Studies not focused on emotions and the strategic decision-making process
Jehn, K. A., Greer, L., Levine, S., & Szulanski, G. (2008).	The effects of conflict types, dimensions, and emergent states on group outcomes.	Excluded	Wrong Context - The article does not address strategic decisions in a business context.	Social
Jeon, S. Y., Kim, K. E., Kim, E. K., Han, H., Lee, H. B., Han, W., Noh, D. Y., & Moon, H. G. (2021).	The emotional status, attitudes in decision-making process, and their impact on surgical choices in Korean breast cancer patients.	Excluded	Wrong Population + Wrong Context - The article does not address strategic decisions in a business context.	Health
Jha, S. S., Naika, C. L. S., Nikhrat, V., & Nair, S. B. (2012).	On using emotions in decision-making by situated robots.	Excluded	Wrong Publication Type	Conference Paper
Ji, L. L., & Peng, H. M. (2016).	The role of emotional information and internal motivation in older adults' decision-making process.	Excluded	Wrong Context - The article does not address strategic decisions in a business context.	Social
Jia, X. B., Xu, S. W., Zhou, Y. H., Wang, L., & Li, W. T. (2023).	A novel dual-channel graph convolutional neural network for facial action unit recognition.	Excluded	Wrong Context - The article does not address strategic decisions in a business context.	Health
Jiang, R., Shao, B., Si, S., Sato, R., & Tsuneo, J. (2021).	Health communication in games at the early stage of COVID-19 epidemic: A grounded theory study based on Plague, Inc.	Excluded	Wrong Context - The article does not address strategic decisions in a business context.	Health
Jiang, Y. P., Jiang, C. M., Hu, T. Y., & Sun, H. Y. (2022).	Effects of emotion on intertemporal decision-making: Explanation from the single dimension priority model.	Excluded	Wrong Context - The article does not address strategic decisions in a business context.	Decision / Emotion Theory
Jiao, H. F., Tang, W. Z., Liu, T. Z., Wang, X., & Ma, L. J. (2022).	How do IT affordances support behavioral intention in charitable crowdfunding? The mediating effects of donor perceptions and motivations.	Excluded	Wrong Context - The article does not address strategic decisions in a business context.	Health
Jin, J. (2019).	Integration of emotion and likelihood information during threat expectation.	Excluded	Wrong Context - The article does not address strategic decisions in a business context.	Social
Jöbges, S., Denke, C., Kumpf, O., & Hartog, C. S. (2019).	Communication with relatives.	Excluded	Wrong Context - The article does not address strategic decisions in a business context.	Health
Johannes, F. I., Diepold, K., & IEEE. (2014).	Path-finding using reinforcement learning and affective states.	Excluded	Wrong Publication Type	Conference Paper
Johnson, A. (2021).	Design of a decision support-based mobile application for crisis support utilizing user-centered design methods.	Excluded	Wrong Context - The article does not address strategic decisions in a business context.	Social
Johnson, B. R. (2023).	Classroom social support: A multiple phenomenological case study of mathematics graduate teaching assistants' decision making in the classroom.	Excluded	Wrong Context - The article does not address strategic decisions in a business context.	Career / Education
Jokic-Begic, N., & Arambasic, L. (2010).	Psychological factors related to genetic testing.	Excluded	Wrong Context - The article does not address strategic decisions in a business context.	Health
Jones Wiggins, B. (2021).	Mental and behavioral health training in residential facilities from employees' perspective: Exploratory case study.	Excluded	Wrong Context - The article does not address strategic decisions in a business context.	Health
Jones, J. W., McCullough, L. B., & Richman, B. W. (2007).	A comprehensive primer of surgical informed consent.	Excluded	Wrong Context - The article does not address strategic decisions in a business context.	Health
Jones, L. E., & O'Shaughnessy, D. F. P. (2014).	The Pain and Movement Reasoning Model: Introduction to a simple tool for integrated pain assessment.	Excluded	Wrong Context - The article does not address strategic decisions in a business context.	Health
Joo, Y. (2013).	Understanding the role of affection in Christian spiritual discernment: Interdisciplinary dialogue between Jonathan Edwards and neuropsychology.	Excluded	Wrong Context - The article does not address strategic decisions in a business context.	Social
Jurasová, K., & Špajdel, M. (2011).	The role of regret in rational decision making.	Excluded	Wrong Context - The article does not address strategic decisions in a business context.	Decision / Emotion Theory
Just, D. (2022).	Positive risk management: An exploration of policy and staff level operationalization.	Excluded	Wrong Context - The article does not address strategic decisions in a business context.	Decision / Emotion Theory
Justel, J. A. (2019).	The cognitive, emotional and social dimensions in career decision-making among students of secondary education.	Excluded	Wrong Population + Wrong Context - The article does not address strategic decisions in a business context.	Health
Justel, J. A., & González, M. A. (2021).	An approach to predictive variables for decision-making among fourth year of ESO and second year of Bachillerato students.	Excluded	Wrong Context - The article does not address strategic decisions in a business context.	Career / Education
Kaipa, P. L. (2014).	Making wise decisions: Leadership lessons from Mahabharata.	Included	Included	Included
Kalina, J., & Zvárová, J. (2016)	Decision support for mental health: Towards the information-based psychiatry.	Excluded	Wrong Publication Type + Wrong Context	Chapter / Health
Kang, X. H., & Nagasawa, S. (2023).	Integrating kansei engineering and interactive genetic algorithm in Jiangxi red cultural and creative product design.	Excluded	Wrong Context - The article does not address strategic decisions in a business context.	Social
Kantamneni, N., Shada, N., Conley, M. R., Hellwege, M. A., Tate, J. M., & Wang, S. C. (2016).	Academic and career development of undocumented college students: The American dream?	Excluded	Wrong Context - The article does not address strategic decisions in a business context.	Health
Kanthimathinathan, S., Prabhu, G. P., Kumar, S. J. P., & Kumar, A. P. (2004).	Training goalkeeper robot using emotion and history based learning method.	Excluded	Wrong Publication Type	Conference Paper
Karamanukyan, A. H. (2022).	Premarital sexual behaviors of Armenian-American women: Influence of ethnic identity.	Excluded	Wrong Context - The article does not address strategic decisions in a business context.	Social
Karavasilis, I., Samoladas, I., & Nedos, A. (2010).	From empiricism to total quality management in Greek education.	Excluded	Wrong Publication Type	Conference Paper
Kaspar, K., & Krull, J. (2013).	Incidental haptic stimulation in the context of flirt behavior.	Excluded	Wrong Context - The article does not address strategic decisions in a business context.	Social
Kasperski, R., & Yariv, E. (2022).	Gut reaction or rational problem-solving? Teachers' considerations when coping with classroom disruptions.	Excluded	Wrong Context - The article does not address strategic decisions in a business context.	Career / Education
Kazantzaki, E., Kondylakis, H., Koumakis, L., Marias, K., Tsiknakis, M., Fioretti, C., Gorini, A., Mazzocco, K., Renzi, C., & Pravettoni, G. (2016).	Psycho-emotional tools for better treatment adherence and therapeutic outcomes for cancer patients.	Excluded	Wrong Publication Type	Health
Kellermanns, F. W., Dibrell, C., & Cruz, C. (2014).	The role and impact of emotions in family business strategy: New approaches and paradigms.	Excluded	Wrong Publication Type	Special Issue
Kennedy, M. A. (2017).	The impact of mental health experts on false confession issues in the judicial system.	Excluded	Wrong Context - The article does not address strategic decisions in a business context.	Health
Kennedy, S., & Chesser-Smyth, P. (2017).	Assessment of undergraduate nursing students from an Irish perspective: Decisions and dilemmas?	Excluded	Wrong Context - The article does not address strategic decisions in a business context.	Career / Education
Kerstis, B., & Widarsson, M. (2020).	When life ceases – Relatives' experiences when a family member is confirmed brain dead and becomes a potential organ donor: A literature review.	Excluded	Wrong Context - The article does not address strategic decisions in a business context.	Health
Khan, M. Y., & Junejo, K. N. (2020).	Exerting 2D-space of sentiment lexicons with machine learning techniques: A hybrid approach for sentiment analysis.	Excluded	Wrong Context - The article does not address strategic decisions in a business context.	AI
Khan, Z., Chidambaram, A., Thomson, M., & Hurst, C. (2019).	An exploration of MDT views on key factors to consider when determining a service users required level of security.	Excluded	Wrong Context - The article does not address strategic decisions in a business context.	Social
Khoury, J. M., Couto, L. F. S. C., Santos, D. A., e Silva, V. H. O., Drumond, J. P. S., e Silva, L. L. C., Malloy-Diniz, L., Albuquerque, M. R., das Neves, M. C. L., & Duarte Garcia, F. (2019).	Bad choices make good stories: The impaired decision-making process and skin conductance response in subjects with smartphone addiction.	Excluded	Wrong Context - The article does not address strategic decisions in a business context.	Health
Kim, H. J., Park, J. Y., Kang, K. T., Chang, B. S., Lee, C. K., & Yeom, J. S. (2015).	Factors influencing the surgical decision for the treatment of degenerative lumbar stenosis in a preference-based shared decision-making process.	Excluded	Wrong Context - The article does not address strategic decisions in a business context.	Health
Kim, H., Adolphs, R., O'Doherty, J. P., & Shimojo, S. (2007).	Temporal isolation of neural processes underlying face preference decisions.	Excluded	Wrong Context - The article does not address strategic decisions in a business context.	Health
Kim, H., Shin, Y., & Han, S. (2014).	The reconstruction of choice value in the brain: A look into the size of consideration sets and their affective consequences.	Excluded	Wrong Context - The article does not address strategic decisions in a business context.	Decision / Emotion Theory
Kim, S. (2023).	Pleasure, utility, and goals: Motivation as a value-based decision-making process.	Excluded	Wrong Context - The article does not address strategic decisions in a business context.	Decision / Emotion Theory
Kimport, K. (2022)	Choosing abortion for a serious fetal health issue: From medical information to values.	Excluded	Wrong Context - The article does not address strategic decisions in a business context.	Health
Kimura, K., Kanayama, N., & Katahira, K. (2023).	Cardiac cycle affects risky decision-making.	Excluded	Wrong Context - The article does not address strategic decisions in a business context.	Health
Kisfalvi, V., & Pitcher, P. (2003).	Doing what feels right – The influence of CEO character and emotions on top management team dynamics.	Included	Included	Included
Knapp, S. J., Gottlieb, M. C., & Handelsman, M. M. (2015)	Ethical dilemmas in psychotherapy: Positive approaches to decision making.	Excluded	Wrong Context - The article does not address strategic decisions in a business context.	Health
Knezovic, E., & Drkic, A. (2021).	Innovative work behavior in SMEs: The role of transformational leadership.	Excluded	Wrong Context - The article does not address strategic decisions in a business context.	Studies not focused on emotions and the strategic decision-making process
Kobewka, D., Lalani, Y., Shaffer, V., Adewole, T., Lypka, K., & Wegier, P. (2023).	"To be or not to be"-Cardiopulmonary resuscitation for hospitalized people who have a low probability of benefit: Qualitative analysis of semi-structured interviews.	Excluded	Wrong Context - The article does not address strategic decisions in a business context.	Health
Koenig, T. L., Lee, J. H., Macmillan, K. R., Fields, N. L., & Spano, R. (2014).	Older adult and family member perspectives of the decision-making process involved in moving to assisted living.	Excluded	Wrong Context - The article does not address strategic decisions in a business context.	Social
Koike, K., Terui, T., Takahashi, Y., Hirayama, Y., Mizukami, N., Yamakage, M., & Kato, J. (2015).	Effectiveness of multidisciplinary team conference on decision-making surrounding the application of continuous deep sedation for terminally ill cancer patients.	Excluded	Wrong Context - The article does not address strategic decisions in a business context.	Health
Kolar, R. (2015).	How long must they suffer? Success and failure of our efforts to end the animal tragedy in laboratories.	Excluded	Wrong Context - The article does not address strategic decisions in a business context.	Animal
Kontio, R., Välimäki, M., Putkonen, H., Kuosmanen, L., Scott, A., & Joffe, G. (2010).	Patient restrictions: Are there ethical alternatives to seclusion and restraint?	Excluded	Wrong Context - The article does not address strategic decisions in a business context.	Health
Korczyn, O. (2011).	Where governmentality ends: Border control officers and deportations of sojourners in Israel.	Excluded	Wrong Context - The article does not address strategic decisions in a business context.	Social
Korkut, Y. (2020).	Teaching and learning psychology ethics as a meaningful and enjoyable experience.	Excluded	Wrong Context - The article does not address strategic decisions in a business context.	Career / Education
Kose, M. R., Ahirwal, M. K., & Kumar, A. (2021).	A new approach for emotions recognition through EOG and EMG signals.	Excluded	Wrong Context - The article does not address strategic decisions in a business context.	Health
Kosíková, K., & Pilárik, L. (2012).	Unconscious visual perception in the decision making process.	Excluded	Wrong Context - The article does not address strategic decisions in a business context.	Decision / Emotion Theory
Kouchaki, M., Smith, I. H., & Savani, K. (2018).	Does deciding among morally relevant options feel like making a choice? How morality constrains people's sense of choice.	Excluded	Wrong Context - The article does not address strategic decisions in a business context.	Health
Kourakos, M., Papoutsis, D., & Tzitiridou, M. (2021).	Emotional intelligence in midwifery education and practice.	Excluded	Wrong Context - The article does not address strategic decisions in a business context.	Health
Kovach, C. R., Evans, C. R., Sattell, L., Rosenau, K., & Gopalakrishnan, S. (2018).	Feasibility and pilot testing of a mindfulness intervention for frail older adults and individuals with dementia.	Excluded	Wrong Context - The article does not address strategic decisions in a business context.	Health
Krishnakumar, S., & Evglevskikh, M. (2016).	Acquiring emotional sea legs: Navigating joy and sadness in ethical decisions.	Excluded	Wrong Context - The article does not address strategic decisions in a business context.	Decision / Emotion Theory
Krishnan, R. (1974).	Democratic participation in decision making by employees in American corporations.	Excluded	Wrong Context - The article does not address strategic decisions in a business context.	Studies not focused on emotions and the strategic decision-making process
Kucukkelepce, G. E., Dinc, L., & Elcin, M. (2021).	Views of nursing students on using standardized patient and in-class case analysis in ethics education.	Excluded	Wrong Context - The article does not address strategic decisions in a business context.	Health
Kukafka, R., Lussier, Y. A., Patel, V. L., & Cimino, J. J. (1999).	Modeling patient response to acute myocardial infarction: Implications for a tailored technology-based program to reduce patient delay.	Excluded	Wrong Context - The article does not address strategic decisions in a business context.	Health
Kumbaroğlu, A. B. (2022).	A Genettian analysis of the unfamiliar in James Joyce’s “Eveline”.	Excluded	Wrong Context - The article does not address strategic decisions in a business context.	Health
Kunst, M. J. J., & Schiltkamp, S. (2020).	Sympathy for the applicant: Investigating its role in decisions about state compensation for violent crime victimization.	Excluded	Wrong Context - The article does not address strategic decisions in a business context.	Social / Legal
Kwak, J., Allen, J., & Haley, W. (2011)	Advance care planning and end-of-life decision making.	Excluded	Wrong Context - The article does not address strategic decisions in a business context.	Health
Kwan, S. S. K. (2008).	End-user digital piracy: Contingency framework, affective determinants and response distortion.	Excluded	Wrong Context - The article does not address strategic decisions in a business context.	Social
Laier, C., Pawlikowski, M., & Brand, M. (2014).	Sexual picture processing interferes with decision-making under ambiguity.	Excluded	Wrong Context - The article does not address strategic decisions in a business context.	Social
Lakhiwal, A., Bala, H., & Leger, P. M. (2020).	Neurophysiological assessment of ambivalence to information.	Excluded	Wrong Publication Type	Conference Paper
Laksmi, L., Laugu, N., Fauziah, K., & Hoogervorst, T. (2023).	The influence of non-rational factors on managerial decision-making and their impact on organizational performance in Indonesian information institutions.	Excluded	Wrong Publication Type	Closed Access
Lally, R. M. (2009).	In the moment: Women speak about surgical treatment decision making days after a breast cancer diagnosis.	Excluded	Wrong Context - The article does not address strategic decisions in a business context.	Health
Lambert, H. C., McColl, M. A., Gilbert, J., Wong, J. H., Murray, G., & Shortt, S. E. D. (2005).	Factors affecting long-term-care residents' decision-making processes as they formulate advance directives.	Excluded	Wrong Context - The article does not address strategic decisions in a business context.	Health
Lamiani, G., Ciconali, M., Argentero, P., & Vegni, E. (2020).	Clinicians' moral distress and family satisfaction in the intensive care unit.	Excluded	Wrong Context - The article does not address strategic decisions in a business context.	Health
Lane, F. J., Nitsch, K. B., Troyk, P., & IEEE. (2015).	Participant perspectives from a cortical vision implant study: Ethical and psychological implications.	Excluded	Wrong Publication Type	Conference Paper
Lang, C. G., & Xi, Y. M. (2005).	A model of group decision-making process: Research on the impacts of group leadership and group conflicts.	Excluded	Wrong Publication Type	Conference Paper
Larsen, K. L., & Stanley, E. A. (2021).	Leaders' windows of tolerance for affect arousal and their effects on political decision-making during COVID-19.	Excluded	Wrong Context - The article does not address strategic decisions in a business context.	Social
Larsen, S. M., Mortensen, R. F., Kristensen, H. K., & Hounsgaard, L. (2019).	Older adults' perspectives on the process of becoming users of assistive technology: A qualitative systematic review and meta-synthesis.	Excluded	Wrong Context - The article does not address strategic decisions in a business context.	Social
Lassman, F., Henderson, R. C., Dockery, L., Clement, S., Murray, J., Bonnington, O., Farrelly, S., & Thornicroft, G. (2015).	How does a decision aid help people decide whether to disclose a mental health problem to employers? Qualitative interview study.	Excluded	Wrong Context - The article does not address strategic decisions in a business context.	Health
Laureano-Cruces, A. L., Acevedo-Moreno, D. A., Mora-Torres, M., & Ramírez-Rodríguez, J. (2012).	A reactive behavior agent: Including emotions into a video game.	Excluded	Wrong Context - The article does not address strategic decisions in a business context.	Health
Laurent, A., Bonnet, M., Capellier, G., Aslanian, P., & Hebert, P. (2017).	Emotional impact of end-of-life decisions on professional relationships in the ICU: An obstacle to collegiality?	Excluded	Wrong Context - The article does not address strategic decisions in a business context.	Health
Le Moal, M. (2008).	Negative affects are parts of the addiction syndrome.	Excluded	Wrong Context - The article does not address strategic decisions in a business context.	Health
LeBlanc, T. W. (2019).	Shared decision-making in acute myeloid leukemia.	Excluded	Wrong Context - The article does not address strategic decisions in a business context.	Health
Ledford, C. J. W., Cafferty, L. A., Moore, J. X., Roberts, C., Whisenant, E. B., Rychtarikova, A. G., & Seehusen, D. A. (2022).	The dynamics of trust and communication in COVID-19 vaccine decision making: A qualitative inquiry.	Excluded	Wrong Context - The article does not address strategic decisions in a business context.	Health / Social
Lee, D., Huh, Y., & Reigeluth, C. M. (2015).	Collaboration, intragroup conflict, and social skills in project-based learning.	Excluded	Wrong Context - The article does not address strategic decisions in a business context.	Career / Education
Lee, E. J., Lam, C., & Ditchman, N. (2015)	Self-determination and cultural considerations: An Asian perspective.	Excluded	Wrong Context - The article does not address strategic decisions in a business context.	Social
Lee, H. J., & Park, D. J. (2022).	Analysis of navigator decision making through cognitive science for the presentation of a collision-avoidance algorithm for MASSs.	Excluded	Wrong Context - The article does not address strategic decisions in a business context.	Social
Lee, Y. S., Kim, J., Joo, S., Go, B., Lee, H., & Chae, Y. (2016).	How do readers choose to undergo treatments based on medical articles?	Excluded	Wrong Context - The article does not address strategic decisions in a business context.	Health
Lejuez, C. W., & Potenza, M. N. (2008).	Expanding the range of vulnerabilities to pathological gambling: A consideration of over-fast discounting processes.	Excluded	Wrong Context - The article does not address strategic decisions in a business context.	Health
Lemetti, T., Partanen, E., Hupli, M., & Haavisto, E. (2021).	Cancer patients' experiences of realization of relatives' participation in hospital care: A qualitative interview study.	Excluded	Wrong Context - The article does not address strategic decisions in a business context.	Health
Lempert, K. M., Carballeira, C., Sehgal, S., & Kable, J. W. (2023).	Pupillometric evidence for a temporal expectations-based account of persistence under temporal uncertainty.	Excluded	Wrong Context - The article does not address strategic decisions in a business context.	Health
Lequin, P., Ferrari, P., Suter, C., Milovan, M., Besse, C., Silva, B., Golay, P., & Bonsack, C., & Favrod, J. (2021).	The Joint Crisis Plan: A powerful tool to promote mental health.	Excluded	Wrong Context - The article does not address strategic decisions in a business context.	Health
Lewandowska, A., & Rybakowski, J. (2009).	Neuropsychological aspects of the manic syndrome in the course of bipolar affective illness.	Excluded	Wrong Context - The article does not address strategic decisions in a business context.	Health
Lewandowska, A., & Rybakowski, J. (2009).	Neuropsychologiczne aspekty zespołu maniakalnego w przebiegu choroby afektywnej dwubiegunowej. [Neuropsychological aspects of the manic syndrome in the course of bipolar affective illness.].	Excluded	Wrong Context - The article does not address strategic decisions in a business context.	Health
Li, M. J., Peng, H. M., & Ji, L. L. (2020).	Roles of cognitive load and self-relevance during emotional information searching on decision-making.	Excluded	Wrong Context - The article does not address strategic decisions in a business context.	Decision / Emotion Theory
Li, W. M., Guo, C., Deng, Z. B., Liu, F. F., Wang, J. J., Guo, R. Q., Wang, C., & Jin, Q. (2023).	Coevolution modeling of group behavior and opinion based on public opinion perception.	Excluded	Wrong Context - The article does not address strategic decisions in a business context.	social
Li, Y. (2009).	An affect venture decision making model of new venture creation.	Excluded	Wrong Population + Wrong Context - The article does not address strategic decisions in a business context.	Social
Li, Y., Ashkanasy, N. M., & Ahlstrom, D. (2014).	The rationality of emotions: A hybrid process model of decision-making under uncertainty.	Excluded	Wrong Context - The article does not address strategic decisions in a business context.	Social
Liang, S. J., Fan, P., & Yang, G. Y. (2023).	To take a risk or not? The effect of perceived scarcity on risky choices.	Excluded	Wrong Context - The article does not address strategic decisions in a business context.	Decision / Emotion Theory
Liang, Z. W., Li, L., & Wang, L. (2022).	Crowd-oriented behavior simulation: Reinforcement learning framework embedded with emotion model.	Excluded	Wrong Publication Type	Conference Paper
Lien, C. T., Huang, S. M., Chen, Y. H., & Cheng, W. T. (2021).	Evidence-based practice of decision-making process in oncofertility care among registered nurses: A qualitative study.	Excluded	Wrong Context - The article does not address strategic decisions in a business context.	Health
Lillie, S. E., Janz, N. K., Friese, C. R., Graff, J. J., Schwartz, K., Hamilton, A. S., Gay, B. B., Katz, S. J., & Hawley, S. T. (2014).	Racial and ethnic variation in partner perspectives about the breast cancer treatment decision-making experience.	Excluded	Wrong Context - The article does not address strategic decisions in a business context.	Health
Lim, H. J., Kim, Y. J., Yang, J. H., Kim, E. J., Choi, J. S., Jung, S. H., Ahn, H. K., Han, J. Y., Kim, M. Y., Choi, K. Y., Kim, J. M., Kim, Y. M., Park, S. Y., & Ryu, H. M. (2002)	Amniotic fluid interphase fluorescence in situ hybridization (FISH) for detection of aneuploidy.	Excluded	Wrong Context - The article does not address strategic decisions in a business context.	Health
Lin, C.-Y. (2022).	Shared decision making in secondary mental healthcare in Taiwan.	Excluded	Wrong Context - The article does not address strategic decisions in a business context.	Health
Lipshits-Braziler, Y., Gati, I., & Tatar, M. (2017).	Strategies for coping with career indecision: Convergent, divergent, and incremental validity.	Excluded	Wrong Context - The article does not address strategic decisions in a business context.	Health
Lisoni, J., Miotto, P., Barlati, S., Calza, S., Crescini, A., Deste, G., Sacchetti, E., & Vita, A. (2020).	Change in core symptoms of borderline personality disorder by tDCS: A pilot study.	Excluded	Wrong Context - The article does not address strategic decisions in a business context.	Health
Liu, B., Yang, T. S., & Xie, W. (2022).	Emotional regulation self-efficacy influences moral decision making: A non-cooperative game study of the new generation of employees.	Excluded	Wrong Context - The article does not address strategic decisions in a business context.	Studies not focused on emotions and the strategic decision-making process
Liu, C., & Yu, R. (2018).	Saliency modulates behavioral strategies in response to social comparison.	Excluded	Wrong Context - The article does not address strategic decisions in a business context.	Social
Liu, J., Chan, S. W. C., Guo, D. M., Lin, Q., Hunter	Decision-making experiences related to mastectomy: A descriptive qualitative study.	Excluded	Wrong Context - The article does not address strategic decisions in a business context.	Health
Liu, Q., Gui, J. X., Peng, B., Fang, P., Zhang, Y. L., & Miao, D. M. (2022).	Chinese language bilinguistic system supports the emotional resonance interpretation model of foreign language effect.	Excluded	Wrong Context - The article does not address strategic decisions in a business context.	Health
Liu, W., & Lin, X. B. (2019).	Family language policy in English as a foreign language: A case study from China to Canada.	Excluded	Wrong Context - The article does not address strategic decisions in a business context.	Social
Liu, X. M. (2019)	The cyber acumen: An integrative framework to understand average users' decision-making processes in cybersecurity.	Excluded	Wrong Context - The article does not address strategic decisions in a business context.	Social
Liu, Z., Yang, L., Long, S., Wang, J., Si, Y., Huang, L., Huang, B., Ding, R., Lu, J., & Yao, D. (2022).	The rewarding compensatory mechanism of music enhances the sense of fairness.	Excluded	Wrong Context - The article does not address strategic decisions in a business context.	Decision / Emotion Theory
Loeckenhoff, C. E. (2004).	Age-related positivity effects in information acquisition and decision-making: Testing socioemotional selectivity theory in the health domain.	Excluded	Wrong Context - The article does not address strategic decisions in a business context.	Health
Lorente, M. P. S., Lopez, E. M., Florez, L. A., Espino, A. L., Martínez, J. A. I., & De Miguel, A. S. (2021).	Explaining deep learning-based driver models.	Excluded	Wrong Context - The article does not address strategic decisions in a business context.	Career / Education
Lowenstein, M., Vijayaraghavan, M., Burke, N. J., Karliner, L., Wang, S., Peters, M., Lozano, A., & Kaplan, C. P. (2019).	Real-world lung cancer screening decision-making: Barriers and facilitators.	Excluded	Wrong Context - The article does not address strategic decisions in a business context.	Health
Luauté, J. P., Sansone, S., Bidault, E., Scheider, P., & Tiberghien, G. (1999).	Face recognition and emotional information in delusional misidentification syndromes.	Excluded	Wrong Context - The article does not address strategic decisions in a business context.	Health
Lubken, T. A. (2021).	Effect of professional exclusion among respiratory therapists in the ICU.	Excluded	Wrong Context - The article does not address strategic decisions in a business context.	Health
Lucena, F. D., & Popadiuk, S. (2020).	Tacit knowledge in unstructured decision process.	Included	Included	Included
Ludwig, G., Geiger, I., Götzmann, L., Jordan, K. D., Döbbel, S., Klaghofer, R., Salathé, M., Stillhard, U., Meinlschmidt, G., Kiss, A., Venetz, J. P., Steiger, J., & Hirt-Minkowski, P. (2022).	Differences between centers in psychosocial evaluations for living kidney donors do not influence outcome: Results from an observational multicenter study.	Excluded	Wrong Context - The article does not address strategic decisions in a business context.	Health
Lugowska, D., Konopinska, J., Mariak, Z., & Obuchowska, I. (2020).	Comparison of subjective preoperative experiences of patients before first- or second-eye cataract surgeries.	Excluded	Wrong Context - The article does not address strategic decisions in a business context.	Health
Luna, G., Kim, M., Miller, R., Parekh, P., Kim, E. S., Park, S. Y., Abdulbaseer, U., Gonzalez, C., & Stiehl, E. (2023).	Interprofessional relationships and their impact on resident hospitalizations in nursing homes: A qualitative study.	Excluded	Wrong Context - The article does not address strategic decisions in a business context.	Health
Lundh, U., Sandberg, J., & Nolan, M. (2000).	‘I don't have any other choice’: Spouses' experiences of placing a partner in a care home for older people in Sweden.	Excluded	Wrong Context - The article does not address strategic decisions in a business context.	Health
Luo, L. B., Zhou, S. P., Cai, W. T., Lees, M., & Low, M. Y. H. (2010).	Modeling human-like decision making for virtual agents in time-critical situations.	Excluded	Wrong Publication Type	Conference Paper
Luo, L. B., Zhou, S. P., Cai, W. T., Lees, M., Low, M. Y. H., & Sornum, K. (2011).	HumDPM: A decision process model for modeling human-like behaviors in time-critical and uncertain situations.	Excluded	Wrong Context - The article does not address strategic decisions in a business context.	Social
Luo, L. B., Zhou, S. P., Cai, W. T., Low, M. Y. H., Tian, F., Wang, Y. W., Xiao, X., & Chen, D. (2008).	Agent-based human behavior modeling for crowd simulation.	Excluded	Wrong Context - The article does not address strategic decisions in a business context.	Social
Luo, Y. D., Chen, L., Li, H. C., Dong, Y., Zhou, X. Q., Qiu, L. L., Zhang, L., Gao, Y. X., Zhu, C. Y., Yu, F. Q., & Wang, K. (2020).	Do individuals with obsessive-compulsive disorder and obsessive-compulsive personality disorder share similar neural mechanisms of decision-making under ambiguous circumstances?	Excluded	Wrong Context - The article does not address strategic decisions in a business context.	Health
Ma, X. (2013).	Age differences in processing strategies of emotionally difficult trade-off decisions.	Excluded	Wrong Context - The article does not address strategic decisions in a business context.	Social
MacDonald-Wilson, K. L., Williams, K., Nikolajski, C. E., McHugo, G., Kang, C., Deegan, P., Carpenter-Song, E., & Kogan, J. N. (2021).	Promoting collaborative psychiatric care decision-making in community mental health centers: Insights from a patient-centered comparative effectiveness trial.	Excluded	Wrong Context - The article does not address strategic decisions in a business context.	Health
MacGill, V. (2018).	Reframing cognitive behavior theory from a systems perspective.	Excluded	Wrong Context - The article does not address strategic decisions in a business context.	Health
Maheshwari, R., & Skinner, Y. (2019).	Forensic patients, treating psychiatrist and the mental health review tribunal: An ethical question?	Excluded	Wrong Context - The article does not address strategic decisions in a business context.	Health
Mailliez, M., Battaïa, O., & Roy, R. N. (2021).	Scheduling and rescheduling operations using decision support systems: Insights from emotional influences on decision-making.	Excluded	Wrong Context - The article does not address strategic decisions in a business context.	Health
Malde, S., Umbach, R., Wheeler, J. R., Lytvyn, L., Cornu, J. N., Gacci, M., Gratzke, C., Herrmann, T. R. W., Mamoulakis, C., Rieken, M., Speakman, M. J., Gravas, S., Drake, M. J., Guyatt, G. H., & Tikkinen, K. A. O. (2021).	A systematic review of patients' values, preferences, and expectations for the diagnosis and treatment of male lower urinary tract symptoms.	Excluded	Wrong Context - The article does not address strategic decisions in a business context.	Health
Maldonado, A., Serra, S., Catena, A., & Megías, A. (2016).	Modifying evaluations and decisions in risky situations.	Excluded	Wrong Context - The article does not address strategic decisions in a business context.	Decision / Emotion Theory
Malhi, G. S., Coulston, C. M., Fritz, K., Lampe, L., Bargh, D. M., Ablett, M., Lyndon, B., Sapsford, R., Theodoros, M., Woolfall, D., van der Zypp, A., Hopwood, M., & Mitchell, A. J. (2014).	Unlocking the diagnosis of depression in primary care: Which key symptoms are GPs using to determine diagnosis and severity?	Excluded	Wrong Context - The article does not address strategic decisions in a business context.	Health
Maloni, J. A. (1996).	Bed rest and high-risk pregnancy: Differentiating the effects of diagnosis, setting, and treatment.	Excluded	Wrong Context - The article does not address strategic decisions in a business context.	Health
Malpass, A., Shaw, A., Sharp, D., Walter, F., Feder, G., Ridd, M., & Kessler, D. (2009).	"Medication career" or "moral career?" The two sides of managing antidepressants: A meta-ethnography of patients' experience of antidepressants.	Excluded	Wrong Context - The article does not address strategic decisions in a business context.	Health
Mandale, S. K., & Kasamani, B. S. (2022).	A decision tree-based model for tender evaluation.	Excluded	Wrong Publication Type	Conference Paper
Mantouka, E. G., Vlahogianni, E. I., Papacharalampous, A. E., Heydenrijk-Ottens, L., Shelat, S., Degeler, V., & van Lint, H. (2019).	Understanding travel behavior through travel happiness.	Excluded	Wrong Context - The article does not address strategic decisions in a business context.	Social
Manzano, A., Eskyte, I., Ford, H. L., Pavitt, S. H., Potrata, B., Schmierer, K., Chataway, J., Webb, E. J. D., Meads, D., Pepper, G., & Bekker, H. L. (2020).	Patient perspective on decisions to switch disease-modifying treatments in relapsing-remitting multiple sclerosis.	Excluded	Wrong Context - The article does not address strategic decisions in a business context.	Health
Mapelli, D., Di Rosa, E., Cavalletti, M., Schiff, S., & Tamburin, S. (2014).	Decision and dopaminergic system: An ERPs study of lowa gambling task in Parkinson's disease.	Excluded	Wrong Context - The article does not address strategic decisions in a business context.	Health
Marcheguet, A., & Loizeau, V. (2023).	Nursing support in the decision-making process regarding the choice of renal replacement therapy: A scoping review.	Excluded	Wrong Context - The article does not address strategic decisions in a business context.	Health
Marchetti, C. A. (2010).	Regret and police reporting among individuals who have experienced sexual assault.	Excluded	Wrong Context - The article does not address strategic decisions in a business context.	Social
Mardaga, S., & Hansenne, M. (2012).	Personality and skin conductance responses to reward and punishment influence on the Iowa gambling task performance.	Excluded	Wrong Context - The article does not address strategic decisions in a business context.	Health
Margalit, R. S., Roter, D., Dunevant, M. A., Larson, S., & Reis, S. (2006).	Electronic medical record use and physician-patient communication: An observational study of Israeli primary care encounters.	Excluded	Wrong Context - The article does not address strategic decisions in a business context.	Health
Margarisova, K., Stastna, K., & Stanislavska, L. K. (2012).	Game-based learning: Using of Six Thinking Hats method reflection.	Excluded	Wrong Context - The article does not address strategic decisions in a business context.	Career / Education
Marineau, J. E., Hood, A. C., & Labianca, G. (2018).	Multiplex conflict: Examining the effects of overlapping task and relationship conflict on advice seeking in organizations.	Excluded	Wrong Context - The article does not address strategic decisions in a business context.	Studies not focused on emotions and the strategic decision-making process
Markman, K. D., & Tetlock, P. E. (2000).	Accountability and close-call counterfactuals: The loser who nearly won and the winner who nearly lost.	Excluded	Wrong Context - The article does not address strategic decisions in a business context.	Health
Marreiros, G., Novais, P., Machado, J., Ramos, C., & Neves, J. (2007).	Modelling group decision simulation through argumentation.	Excluded	Wrong Publication Type	Conference Paper
Marreiros, G., Santos, R., Novais, P., Machado, J., Ramos, C., Neves, J., & Bula-Cruz, J. (2007).	Argumentation-based decision making in ambient intelligence environments.	Excluded	Wrong Context - The article does not address strategic decisions in a business context.	AI
Marshak, R. J., & Heracleous, L. (2023).	The effect of evocative frames on strategic decisions.	Excluded	Wrong Population + Wrong Context - The article does not address strategic decisions in a business context.	Students / Social
Marshall, C. C. (2023).	Battered woman syndrome as a legal defense in cases of intimate partner homicide.	Excluded	Wrong Context - The article does not address strategic decisions in a business context.	Legal
Martin, A., Bagdasarov, Z., & Connelly, S. (2015).	The capacity for ethical decisions: The relationship between working memory and ethical decision making.	Excluded	Wrong Context - The article does not address strategic decisions in a business context.	Decision / Emotion Theory
Martin, L. R., & DiMatteo, M. R. (2013)	Clinical interactions.	Excluded	Wrong Context - The article does not address strategic decisions in a business context.	Health
Martínez-Miranda, J., & Pavón, J. (2009).	An agent-based simulation tool to support work teams formation.	Excluded	Wrong Publication Type	Conference Paper
Martínez-Selva, J. M., Sánchez-Navarro, J. P., Bechara, A., & Román, F. (2006).	Brain mechanisms involved in decision-making.	Excluded	Wrong Context - The article does not address strategic decisions in a business context.	Health
Martinez, E., Mera, G., González, C., López, D. M., & Blobel, B. (2015).	EmoBurnout: An approach for supporting burnout syndrome diagnosis.	Excluded	Wrong Publication Type	Conference Paper
Masuyama, N., Loo, C. K., & IEEE. (2015).	Robotic emotional model with personality factors based on pleasant-arousal scaling model.	Excluded	Wrong Publication Type	Conference Paper
Masuyama, N., Loo, C. K., & Seera, M. (2018).	Personality affected robotic emotional model with associative memory for human-robot interaction.	Excluded	Wrong Context - The article does not address strategic decisions in a business context.	Health
Mathisen, V., Lorem, G. F., Obstfelder, A., & Mæseide, P. (2016).	Whose decision is it anyway? A qualitative study of user participation and how clinicians deal with the patient perspective in mental healthcare.	Excluded	Wrong Context - The article does not address strategic decisions in a business context.	Health
Matjuschenko, K., Keinki, C., & Huebner, J. (2023).	Patients' reasons to consider and their attitudes toward complementary and alternative medicine.	Excluded	Wrong Context - The article does not address strategic decisions in a business context.	Health
Mátrai, Z., Kenessey, I., Sávólt, A., Ujhelyi, M., Bartal, A., & Kásler, M. (2014).	Evaluation of patient knowledge, desire, and psychosocial background regarding postmastectomy breast reconstruction in Hungary: A questionnaire study of 500 cases.	Excluded	Wrong Context - The article does not address strategic decisions in a business context.	Health
Matsuda, A., Misawa, H., Horio, K., & IEEE. (2011).	Decision making based on reinforcement learning and emotion learning for social behavior.	Excluded	Wrong Publication Type	Conference Paper
Maule, A. J., & Hodgkinson, G. P. (2002).	Heuristics, biases and strategic decision making.	Excluded	Wrong Context - The article does not address strategic decisions in a business context.	Studies not focused on emotions and the strategic decision-making process
Mayes, C. G., & Cochran, K. (2023).	Factors influencing perioperative nurse turnover: A classic grounded theory study.	Excluded	Wrong Context - The article does not address strategic decisions in a business context.	Health
McCallum, C. M. (2016).	"Mom made me do it": The role of family in African Americans' decisions to enroll in doctoral education.	Excluded	Wrong Context - The article does not address strategic decisions in a business context.	Career / Education
McNatt, D. B. (2010).	Negative reputation and biased student evaluations of teaching: Longitudinal results from a naturally occurring experiment.	Excluded	Wrong Context - The article does not address strategic decisions in a business context.	Career / Education
McQuirter, M., Castiglia, L. L., Loiselle, C. G., & Wong, N. (2010).	Decision-making process of women carrying a BRCA1 or BRCA2 mutation who have chosen prophylactic mastectomy.	Excluded	Wrong Context - The article does not address strategic decisions in a business context.	Health
Mcvea, K. L. S. P., Minier, W. C., & Palensky, J. E. J. (2001).	Low-income women with early-stage breast cancer: Physician and patient decision-making styles.	Excluded	Wrong Context - The article does not address strategic decisions in a business context.	Health
Meena, J. K., Jakhetiya, A., & Pandey, A. (2021).	Qualitative research in surgical disciplines: Need and scope.	Excluded	Wrong Context - The article does not address strategic decisions in a business context.	Health
Meghdadi, A., Akbarzadeh-T, M. R., & Javidan, K. (2022).	A quantum-like cognitive approach to modeling human biased selection behavior.	Excluded	Wrong Context - The article does not address strategic decisions in a business context.	Health
Megías, A., Navas, J. F., Petrova, D., Cándido, A., Maldonado, A., Garcia-Retamero, R., & Catena, A. (2015).	Neural mechanisms underlying urgent and evaluative behaviors: An fMRI study on the interaction of automatic and controlled processes.	Excluded	Wrong Context - The article does not address strategic decisions in a business context.	Health
Meissner, P., Poensgen, C., & Wulf, T. (2021).	How hot cognition can lead us astray: The effect of anger on strategic decision making.	Included	Included	Included
Meloni, A. (2009).	The effect of attachment on jury decision making.	Excluded	Wrong Context - The article does not address strategic decisions in a business context.	Legal
Melville, S. D. (1977).	Recruit, screen, and hire: Staff selection and the decision-making process.	Excluded	Wrong Context - The article does not address strategic decisions in a business context.	Studies not focused on emotions and the strategic decision-making process
Mencl, J., & May, D. R. (2009).	The effects of proximity and empathy on ethical decision-making: An exploratory investigation.	Excluded	Wrong Context - The article does not address strategic decisions in a business context.	Studies not focused on emotions and the strategic decision-making process
Mendelsohn, N., & Bachar, R. (2017).	Approach to the non-adherent patient.	Excluded	Wrong Context - The article does not address strategic decisions in a business context.	Health
Meng, C. L. (2022).	Top management team cognition and strategic decision performance: The mediating role of team conflict.	Excluded	Wrong Context - The article does not address strategic decisions in a business context.	Studies not focused on emotions and the strategic decision-making process
Meng, F. B., Zhang, X. F., Guo, X. T., Lai, K. H., & Zhao, X. L. (2019).	How do patients with chronic diseases make usage decisions regarding mobile health monitoring service?	Excluded	Wrong Context - The article does not address strategic decisions in a business context.	Health
Merlhiot, G., Mermillod, M., Le Pennec, J. L., Hidalgo, S., & Mondillon, L. (2018).	Reducing uncertainty to promote appropriate decisions when facing hazardous phenomena at an active volcano.	Excluded	Wrong Context - The article does not address strategic decisions in a business context.	Social / Environmental
Merritt, S. M. (2011).	Affective processes in human-automation interactions.	Excluded	Wrong Context - The article does not address strategic decisions in a business context.	Health / AI
Meyer, M. S., & Cranmore, J. (2020).	College bound: Advice for academically talented students from recent graduates.	Excluded	Wrong Context - The article does not address strategic decisions in a business context.	Career / Education
Meyers, K., Wu, Y. M., Brill, A., Sandfort, T., & Golub, S. A. (2018).	To switch or not to switch: Intentions to switch to injectable PrEP among gay and bisexual men with at least 12 months oral PrEP experience.	Excluded	Wrong Context - The article does not address strategic decisions in a business context.	Health / Social
Michalowska, S. (2020).	Psychosocial context of the decision-making process and the consequences of preventive procedures in a patient with BRCA1 genetic mutation.	Excluded	Wrong Context - The article does not address strategic decisions in a business context.	Health
Michel, A., Ahlers, O., Hack, A., & Kellermanns, F. W. (2020).	Who is the king of the hill? On bargaining power in private equity buyouts.	Included	Included	Included
Mickel, A. E., & Ozcelik, H. (2008).	When executives get angry: The importance of anger and its triggers to ethical awareness and sensitivity.	Excluded	Wrong Publication Type	Conference Paper
Mikkelsen, E. N., & Clegg, S. (2018).	Unpacking the meaning of conflict in organizational conflict research.	Excluded	Wrong Context - The article does not address strategic decisions in a business context.	Decision / Emotion Theory
Milan, L., Doucéne, S., Lenoir, G., Farsi, F., Moumjid, N., & Blot, F. (2023).	Facilitators and barriers to shared decision-making in France in 2021: National survey in cancer.	Excluded	Wrong Context - The article does not address strategic decisions in a business context.	Health
Miliutina, K., Trofimov, A., Zelenin, V., Andrushchenko, T., & Karamushka, L. (2023).	The role of pets in preserving the emotional and spiritual wellbeing of Ukrainian residents during Russian hostilities.	Excluded	Wrong Context - The article does not address strategic decisions in a business context.	Social
Millard, E., Hounsell, L., Fernandes, J., Jakku, M., Boast, K., Church, O., Priebe, S., & Carr, C. (2021).	How do you know what you want? Service user views on decision aids for the arts therapies.	Excluded	Wrong Context - The article does not address strategic decisions in a business context.	Health
Minami, S., Watanabe, K., Saijo, N., & Kashino, M. (2023).	Neural oscillation amplitude in the frontal cortex predicts esport results.	Excluded	Wrong Context - The article does not address strategic decisions in a business context.	Health
Miranda, D. R., & González, L. F. (2015).	Clinical implications of the "war against cancer".	Excluded	Wrong Context - The article does not address strategic decisions in a business context.	Health
Mohamad, N. S., Yassin, S. F. M., Ishak, N. M., Esrati, M. Z., & Saali, M. M. M. (2015).	The online assessment system for Permata Pintar school holiday program.	Excluded	Wrong Publication Type	Conference Paper
Mohna-Jiménez, T., Gutiérrez-García, A. G., Hernández-Domínguez, L., & Contreras, C. M. (2008).	Estress psicosocial: Algunos aspectos clínicos y experimentales. [Psychosocial stress: Some clinical and experimental aspects.].	Excluded	Wrong Context - The article does not address strategic decisions in a business context.	Health
Molina-Jiménez, T., Gutiérrez-García, A. G., Hernández-Domínguez, L., & Contreras, C. M. (2008).	Psychosocial stress: Some clinical and experimental aspects.	Excluded	Wrong Publication Type	Health
Molyneux, G. (2007).	Involuntary admission in Ireland.	Excluded	Wrong Context - The article does not address strategic decisions in a business context.	Health
Monteiro, M. C., Magalhães, A. S., Féres-Carneiro, T., & Machado, R. N. (2016).	Terminalidade em UTI: Dimensões emocionais e éticas do cuidado do médico intensivista. [Terminality in the ICU: The emotional and ethical dimensions of the medical care of the intensivist.].	Excluded	Wrong Context - The article does not address strategic decisions in a business context.	Health
Montoya, A. A. I., Hazel, S. J., Matthew, S. M., & McArthur, M. L. (2021).	Why do veterinarians leave clinical practice? A qualitative study using thematic analysis.	Excluded	Wrong Context - The article does not address strategic decisions in a business context.	Health
Mooney, A. C., Holahan, P. J., & Amason, A. C. (2007).	Don't take it personally: Exploring cognitive conflict as a mediator of affective conflict.	Excluded	Wrong Context - The article does not address strategic decisions in a business context.	Social
Mora, H., Pérez-delHoyo, R., Paredes-Pérez, J. F., & Mollà-Sirvent, R. A. (2018).	Analysis of social networking service data for smart urban planning.	Excluded	Wrong Context - The article does not address strategic decisions in a business context.	Social
Morelli, M., Casagrande, M., & Forte, G. (2022).	Decision making: A theoretical review.	Excluded	Wrong Context - The article does not address strategic decisions in a business context.	Decision / Emotion Theory
Morris, K., & Orr, F. (2007).	Is there a role for psychiatry in late termination of pregnancy?	Excluded	Wrong Context - The article does not address strategic decisions in a business context.	Health
Morrissette, A. M., & Kisamore, J. L. (2020).	Trust and performance in business teams: A meta-analysis.	Excluded	Wrong Context - The article does not address strategic decisions in a business context.	Incluir
Moulson, N., Dorian, P., Krahn, A., Virani, A., Isserow, S., & McKinney, J. (2020).	Shared decision making and the cardiovascular care of athletes: Is it time to get back in the game?	Excluded	Wrong Context - The article does not address strategic decisions in a business context.	Health
Moyano-Díaz, E., & Mendoza-Llanos, R. (2020).	New approaches to maximization: Evidence of correlations with malaise and well-being in the Chilean adult population.	Excluded	Wrong Context - The article does not address strategic decisions in a business context.	Health
Mrozynski, H., & Kuhn, E. (2022).	Reasoning for autonomous suicide? A qualitative approach to pre-suicidal decision-making.	Excluded	Wrong Context - The article does not address strategic decisions in a business context.	Health
Müceldili, B., Ertosun, Ö. G., & Erdil, O. (2017).	An empirical investigation of career optimism among Turkish university students.	Excluded	Wrong Publication Type	Health
Müller, C. (2006).	Two-layered speaker classification using dynamic Bayesian networks.	Excluded	Wrong Publication Type	Conference Paper
Murray, L. K., Dorsey, S., Haroz, E., Lee, C., Alsiary, M. M., Haydary, A., Weiss, W. M., & Bolton, P. (2014).	A common elements treatment approach for adult mental health problems in low- and middle-income countries.	Excluded	Wrong Context - The article does not address strategic decisions in a business context.	Health
Murugesu, L., Damman, O. C., Derksen, M. E., Timmermans, D. R. M., de Jonge, A., Smets, E. M. A., & Fransen, M. P. (2021).	Women's participation in decision-making in maternity care: A qualitative exploration of clients' health literacy skills and needs for support.	Excluded	Wrong Context - The article does not address strategic decisions in a business context.	Health
Muslin, I. S. (2012).	Effects of a sexual harassment or racial discrimination allegation on perceptions and workplace devaluation regarding the accused.	Excluded	Wrong Context - The article does not address strategic decisions in a business context.	Legal
Naunheim, M. R., Von Sneidern, M., Huston, M. N., Okose, O. C., Ahmed, A. H. A., Randolph, G. W., & Shrime, M. G. (2023).	Patient experiences with thyroid nodules: A qualitative interview survey.	Excluded	Wrong Population + Wrong Context - The article does not address strategic decisions in a business context.	Health
Naylor, A. H., & Yeager, J. M. (2013).	A 21st-century framework for character formation in sports.	Excluded	Wrong Context - The article does not address strategic decisions in a business context.	Career / Education
Nazir, A. H., & Liljenström, H. (2016).	Neurodynamics of decision-making: A computational approach.	Excluded	Wrong Publication Type	Conference Paper
Negoita, B. (2021).	Strategic alignment, IT literacy, collective IS use: Elements driving the IT value proposition.	Excluded	Wrong Publication Type	Dissertation
Netz, J., Svensson, M., & Brundin, E. (2020).	Business disruptions and affective reactions: A strategy-as-practice perspective on fast strategic decision making.	Included	Included	Included
Neumann, F., & Wulf, T. (2022).	Intercultural differences in issue interpretation: Effects of emotions and framing.	Included	Included	Included
Nezu, A. M., Saad, R., & Nezu, C. M. (2000).	Clinical decision making in behavioral supervision: "… And how does that make you feel?"	Excluded	Wrong Context - The article does not address strategic decisions in a business context.	Health
Nguyen, P. T., Sanders, K., Schwarz, G. M., & Rafferty, A. E. (2022).	The linkage between cognitive diversity and team innovation: Exploring the roles of team humor styles and team emotional intelligence via the conservation of resources theory.	Included	Included	Included
Nguyen, V. T., Longin, D., Ho, T. V., & Gaudou, B. (2014).	Integration of emotion in evacuation simulation.	Excluded	Wrong Publication Type	Conference Paper
Nichols, L. H. (2003).	Ethical decision-making in therapists with HIV-positive patients in duty to protect situation.	Excluded	Wrong Context - The article does not address strategic decisions in a business context.	Health
Nicholson, J. S. (2010).	Promoting the end-of-life care decision-making process: Getting a foot-in-the-door.	Excluded	Wrong Context - The article does not address strategic decisions in a business context.	Health
Nielek, R., Ciastek, M., Kopec, W., & ACM. (2017).	Emotions make cities live: Towards mapping emotions of older adults on urban space.	Excluded	Wrong Publication Type	Conference Paper
Nieuwazny, J., Nowakowski, K., Ptaszynski, M., Masui, F., Rzepka, R., & Araki, K. (2021).	Does change in ethical education influence core moral values? Towards history- and culture-aware morality model with application in automatic moral reasoning.	Excluded	Wrong Context - The article does not address strategic decisions in a business context.	Career / Education
Nisar, T. M., Prabhakar, G., & Torchia, M. (2019).	Whistleblowing: When do employees act to blow the whistle?	Excluded	Wrong Context - The article does not address strategic decisions in a business context.	Decision / Emotion Theory
Nishimura, R., Menrai, K., & Kajihara, M. (2023).	Is decision-making influenced by interactions between extended wakefulness and weak emotional stressors? An experimental study.	Excluded	Wrong Context - The article does not address strategic decisions in a business context.	Health
Njozing, N. B., Edin, K. E., & Hurtig, A. K. (2010).	‘When I get better I will do the test’: Facilitators and barriers to HIV testing in Northwest Region of Cameroon with implications for TB and HIV/AIDS control programmes.	Excluded	Wrong Context - The article does not address strategic decisions in a business context.	Health
Nobari, K. D., Albers, F., Bartsch, K., Braun, J., & Bertram, T. (2022).	Modeling driver-vehicle interaction in automated driving.	Excluded	Wrong Context - The article does not address strategic decisions in a business context.	AI
Nolan, K. P., & Harold, C. M. (2010).	Fit with what? The influence of multiple self-concept images on organizational attraction.	Excluded	Wrong Context - The article does not address strategic decisions in a business context.	Social
Norris, G., & Brookes, A. (2021).	Personality, emotion and individual differences in response to online fraud.	Excluded	Wrong Context - The article does not address strategic decisions in a business context.	Social
Norris, G., Parker, R., Beaver, C., & van Konkelenberg, J. (2007).	Addressing Aboriginal mental health issues on the Tiwi Islands.	Excluded	Wrong Context - The article does not address strategic decisions in a business context.	Health
Novac, A., Zahn, C., & Blinder, B. J. (2022).	Identity narrative, group and individual narratives and their role in social stability: A multidisciplinary approach.	Excluded	Wrong Context - The article does not address strategic decisions in a business context.	Social
Nygren, T. E. (1997).	Framing of task performance strategies: Effects on performance in a multattribute dynamic decision making environment.	Excluded	Wrong Context - The article does not address strategic decisions in a business context.	Decision / Emotion Theory
O'Doherty, J. P. (2007)	Lights, camembert, action! The role of human orbitofrontal cortex in encoding stimuli, rewards, and choices.	Excluded	Wrong Publication Type + Wrong Context	Conference Paper / Health
O'Hair, D., Villagran, M. M., Wittenberg, E., Brown, K., Ferguson, M., Hall, H. T., & Doty, T. (2003).	Cancer survivorship and agency model: Implications for patient choice, decision making, and influence.	Excluded	Wrong Context - The article does not address strategic decisions in a business context.	Health
O'Neill, T. (2016).	The front-line leader's interpretation of emotional intelligence skills.	Excluded	Wrong Publication Type	Dissertation
Ogawa, S., & Parhar, I. S. (2022).	Functions of habenula in reproduction and socio-reproductive behaviors.	Excluded	Wrong Context - The article does not address strategic decisions in a business context.	Health
Ogawa, S., & Parhar, I. S. (2022).	Role of habenula in social and reproductive behaviors in fish: Comparison with mammals.	Excluded	Wrong Context - The article does not address strategic decisions in a business context.	Animal
Oktug, Z. (2013).	The mediating effect of emotion management on the relationship between self-esteem in decision making and decision making style.	Excluded	Wrong Publication Type	Conference Paper
Oliva, M., & Anikin, A. (2018).	Pupil dilation reflects the time course of emotion recognition in human vocalizations.	Excluded	Wrong Context - The article does not address strategic decisions in a business context.	Health
Oliveira-Ericson, P. (2020).	The relationship between political affiliation and rational judgment on the level of personal and social responsibility.	Excluded	Wrong Context - The article does not address strategic decisions in a business context.	Social
Orabi, A. A., Mawman, D., Al-Zoubi, F., Saeed, S. R., & Ramsden, R. T. (2006).	Cochlear implant outcomes and quality of life in the elderly: Manchester experience over 13 years.	Excluded	Wrong Context - The article does not address strategic decisions in a business context.	Health
Orozco-Cabal, L., Liu, J., Pollandt, S., Schmidt, K., Shinnick-Gallagher, P., & Gallagher, J. P. (2008).	Dopamine and corticotropin-releasing factor synergistically alter basolateral amygdala-to-medial prefrontal cortex synaptic transmission: Functional switch after chronic cocaine administration.	Excluded	Wrong Context - The article does not address strategic decisions in a business context.	Health
Orozco, E. (2019)	Working with interpreters while delivering trauma therapy.	Excluded	Wrong Publication Type	Book Chapter
Ortiz, L. L. L., González, B. M., & Alfonso, M. A. S. (2022).	Local decision making and aging policies during COVID-19.	Excluded	Wrong Publication Type	Conference Paper
Osborn, D. S., Kronholz, J. F., Finklea, J. T., & Cantonis, A. M. (2014).	Technology-savvy career counseling.	Excluded	Wrong Context - The article does not address strategic decisions in a business context.	Health
Osborn, D. S., Saunders, D. E., & Wilde, C. (2014)	Cognitive information processing theory.	Excluded	Wrong Publication Type + Wrong Context	Book / Decision / Emotion Theory
Osipenko, T. A. (2023).	Inference pragmatics of the interjection hm in stress interaction (based on the medical consultations of an oncologist and a cancer patient).	Excluded	Wrong Context - The article does not address strategic decisions in a business context.	Health
Osterman, M. D. (2017).	Exploring relationships between thinking style and sex, age, academic major, occupation, and levels of arts engagement among professionals working in museums.	Excluded	Wrong Context - The article does not address strategic decisions in a business context.	Studies not focused on emotions and the strategic decision-making process
Othman, E. H., Khalaf, I. A., Zeilani, R., Majali, S., Nabolsi, M., & Abdalrahim, M. (2023).	Decision making near end-of-life: A qualitative exploration of the lived experiences of Jordanian healthcare providers.	Excluded	Wrong Context - The article does not address strategic decisions in a business context.	Health
Owen, T., & Association for Computing Machinery (ACM). (2011).	Don't let me down: Using contextual information to aid diabetics.	Excluded	Wrong Publication Type	Conference Paper
Paat, Y. F., & Torres, L. R. (2020).	Diseases don't need passports: A life course approach to understanding high-risk sexual behaviors and attitudes among international travelers.	Excluded	Wrong Context - The article does not address strategic decisions in a business context.	Health
Page, K. M., & Vella-Brodrick, D. A. (2012)	From nonmalfeasance to beneficence: Key criteria, approaches, and ethical issues relating to positive employee health and well-being.	Excluded	Wrong Publication Type	Book Chapter
Pakhomov, A., & Sudin, N. (2013).	Thermodynamic view on decision-making process: Emotions as a potential power vector of realization of the choice.	Excluded	Wrong Context - The article does not address strategic decisions in a business context.	Decision / Emotion Theory
Palmer, C., Niemand, T., Stöckmann, C., Kraus, S., & Kailer, N. (2019).	The interplay of entrepreneurial orientation and psychological traits in explaining firm performance.	Included	Included	Included
Palton, R. W. T. (2021).	The factors that influence the decision-making process of principals in the adoption of social and emotional learning.	Excluded	Wrong Context - The article does not address strategic decisions in a business context.	Social
Panday, J., Velikonja, D., Moll, S. E., & Harris, J. E. (2022).	Experiences of inpatient rehabilitation from the perspective of persons with acquired brain injury.	Excluded	Wrong Context - The article does not address strategic decisions in a business context.	Health
Pandey, S. K., & Mookerjee, A. (2018).	Assessing the role of emotions in B2B decision making: An exploratory study.	Excluded	Wrong Context - The article does not address strategic decisions in a business context.	studies not focused on emotions and the strategic decision-making process
Papachristou, C., Marc, W., Frommer, J., & Klapp, B. F. (2010).	Decision-making and risk-assessment in living liver donation: How informed is the informed consent of donors? A qualitative study.	Excluded	Wrong Context - The article does not address strategic decisions in a business context.	Health
Paradeda, R., Ferreira, M. J., Oliveira, R., Martinho, C., & Paiva, A. (2019).	The role of assertiveness in a storytelling game with persuasive robotic non-player characters.	Excluded	Wrong Publication Type	Conference Paper
Paradeda, R., Ferreira, M. J., Oliveira, R., Martinho, C., & Paiva, A. (2019).	What makes a good robotic advisor? The role of assertiveness in human-robot interaction.	Excluded	Wrong Publication Type	Conference Paper
Parayitam, S., & Dooley, R. S. (2007).	The relationship between conflict and decision outcomes: Moderating effects of cognitive- and affect-based trust in strategic decision-making teams.	Included	Included	Included
Parayitam, S., Olson, B. J., & Bao, Y. J. (2010).	Task conflict, relationship conflict and agreement-seeking behavior in Chinese top management teams.	Included	Included	Included
Park, E. H., Ramesh, B., & Cao, L. (2016).	Emotion in IT investment decision making with a real options perspective: The intertwining of cognition and regret.	Included	Included	Included
Park, S., Tod, D., & Lavallee, D. (2012).	Exploring the retirement from sport decision-making process based on the transtheoretical model.	Excluded	Wrong Context - The article does not address strategic decisions in a business context.	Sports
Parker, P. A., Peterson, S. K., Bedrosian, I., Crosby, M. A., Shen, Y., Black, D. M., Babiera, G., Kuerer, H. M., Ying, J., Dong, W. L., Cantor, S. B., & Brewster, A. M. (2016).	Prospective study of surgical decision-making processes for contralateral prophylactic mastectomy in women with breast cancer.	Excluded	Wrong Publication Type	Health
Parra, X., Tort-Martorell, X., Alvarez-Gomez, F., & Ruiz-Viñals, C. (2020)	Evaluation of decision-making in family business mixing data-based and socioemotional wealth considerations.	Excluded	Wrong Publication Type	Book Chapter
Pasman, H. R. W., The, B. A. M., Onwuteaka-Philipsen, B. D., Ribbe, M. W., & Van der Wal, G. (2004).	Participants in the decision making on artificial nutrition and hydration to demented nursing home patients: A qualitative study.	Excluded	Wrong Context - The article does not address strategic decisions in a business context.	Health
Patel, V. L., Yoskowitz, N. A., & Kaufman, D. R. (2007).	Comprehension of sexual situations and its relationship to risky decisions by young adults.	Excluded	Wrong Context - The article does not address strategic decisions in a business context.	Health
Pathak, A., Poulter, N. R., Kavanagh, M., Kreutz, R., & Burnier, M. (2022).	Improving the management of hypertension by tackling awareness, adherence, and clinical inertia: A symposium report.	Excluded	Wrong Context - The article does not address strategic decisions in a business context.	Health
Pattenden, J., Watt, I., Lewin, R. J. P., & Stanford, N. (2002).	Decision making processes in people with symptoms of acute myocardial infarction: Qualitative study.	Excluded	Wrong Context - The article does not address strategic decisions in a business context.	Health
Patterson, M. G. (2021).	Transition and belonging for lateral transfer students commuting to campus: An interpretive phenomenological analysis.	Excluded	Wrong Context - The article does not address strategic decisions in a business context.	Social
Pavlova, T. S., & Bobyl, V. V. (2018).	The phenomenon of negative emotions in the social existence of human.	Excluded	Wrong Context - The article does not address strategic decisions in a business context.	Social
Payne, L. K. (2015).	Intuitive decision making as the culmination of continuing education: A theoretical framework.	Excluded	Wrong Context - The article does not address strategic decisions in a business context.	Career / Education
Pe, M. L., Vandekerckhove, J., & Kuppens, P. (2013).	A diffusion model account of the relationship between the emotional flanker task and rumination and depression.	Excluded	Wrong Context - The article does not address strategic decisions in a business context.	Health
Peng, J. L., & Zhang, Q. (2022).	The evolutionary game of post-conflict management for new generation of construction workers in China: The mediating role of foremen.	Excluded	Wrong Context - The article does not address strategic decisions in a business context.	Studies not focused on emotions and the strategic decision-making process
Perlow, L. A., & Repenning, N. P. (2009).	The dynamics of silencing conflict.	Excluded	Wrong Publication Type	Book Chapter
Petrou, M., Lazuras, L., Hillier, M., & Mojtahedi, D. (2022).	Doping behaviour in mixed martial arts athletes: The roles of social norms and self-regulatory efficacy.	Excluded	Wrong Context - The article does not address strategic decisions in a business context.	Sports
Pfeiffer, L., Sims, T., & Rosenthal, P. (2017).	Visualizing workload and emotion data in air traffic control: An approach informed by the supervisor's decision-making process.	Excluded	Wrong Publication Type	Conference Paper
Phang, A., Fan, W. H., & Arbona, C. (2020).	Secure attachment and career indecision: The mediating role of emotional intelligence.	Excluded	Wrong Context - The article does not address strategic decisions in a business context.	Health
Phillips, B. K., Prybutok, V., & Peak, D. (2014).	Determinants of task performance in a visual decision-making process.	Excluded	Wrong Context - The article does not address strategic decisions in a business context.	Decision / Emotion Theory
Phillips, P. J., & Pohl, G. (2020).	Anticipated regret, terrorist behaviour & the presentation of the outcomes of attacks in the mainstream media and in terrorist group publications.	Excluded	Wrong Context - The article does not address strategic decisions in a business context.	Social
Pierce, J. E., Petro, N. M., Clancy, E., Gratton, C., Petersen, S. E., & Neta, M. (2023).	Specialized late cingulo-opercular network activation elucidates the mechanisms underlying decisions about ambiguity.	Excluded	Wrong Context - The article does not address strategic decisions in a business context.	Health
Pilárik, L., & Sarmány-Schuller, I. (2009).	Emotional intelligence and decision-making of female students of social work in the Iowa Gambling Task.	Excluded	Wrong Context - The article does not address strategic decisions in a business context.	Career / Education
Pilárik, L., & Sarmány-Schuller, I. (2011).	Personality predictors of decision-making of medical rescuers.	Excluded	Wrong Context - The article does not address strategic decisions in a business context.	Health
Pitasi, A., Dib, N. B., & Portolese, G. (2018).	Legislative innovation: Towards a global law-making process – The case of global citizenship policy modelling.	Excluded	Wrong Context - The article does not address strategic decisions in a business context.	Social
Platis, M. (2013).	Decision-making processes based on emotions in universities as learning organizations.	Excluded	Wrong Publication Type	Conference Paper
Polignano, M., Narducci, F., de Gemmis, M., & Semeraro, G. (2021).	Towards emotion-aware recommender systems: An affective coherence model based on emotion-driven behaviors.	Excluded	Wrong Context - The article does not address strategic decisions in a business context.	Decision / Emotion Theory
Polo, E. M., Mollura, M., Zanet, M., Lenatti, M., Paglialonga, A., Barbieri, R., & IEEE. (2021).	Analysis of the effect of emotion elicitation on the cardiovascular system.	Excluded	Wrong Publication Type	Conference Paper
Polstra, M. D. (2005).	Individual differences in processes of motivated reasoning: Goals, prior beliefs, and the collection and evaluation of evidence.	Excluded	Wrong Context - The article does not address strategic decisions in a business context.	Social
Pompili, C., Brunelli, A., Xiumé, F., Refai, M., Salati, M., & Sabbatini, A. (2011).	Predictors of postoperative decline in quality of life after major lung resections.	Excluded	Wrong Context - The article does not address strategic decisions in a business context.	Health
Ponnet, K., Tholen, R., De Bruyn, S., Wouters, E., Van Ouytsel, J., Walrave, M., & Van Hal, G. (2021).	Students' stimulant use for cognitive enhancement: A deliberate choice rather than an emotional response to a given situation.	Excluded	Wrong Context - The article does not address strategic decisions in a business context.	Social
Pop, G. V., & Van Nieuwerburgh, C. (2019).	Listening to your heart or head? An interpretative phenomenological analysis of how people experienced making good career decisions.	Excluded	Wrong Context - The article does not address strategic decisions in a business context.	Health
Popova, T. V., & Kalashnikova, A. S. (2018).	Scientific and practical recommendations for the prevention of emotional burnout among judges.	Excluded	Wrong Context - The article does not address strategic decisions in a business context.	Health / Legal
Poppa, K. (2019).	Self-care is soul care.	Excluded	Wrong Context - The article does not address strategic decisions in a business context.	Health
Porter, S., & ten Brinke, L. (2009).	Dangerous decisions: A theoretical framework for understanding how judges assess credibility in the courtroom.	Excluded	Wrong Context - The article does not address strategic decisions in a business context.	Legal
Power, T. E. (2006).	The decision to undergo genetic testing for BRCA1/2 in a community sample of Ashkenazi Jewish women: Coping with the risk of cancer or coping with anticipated emotion?	Excluded	Wrong Context - The article does not address strategic decisions in a business context.	Health
Pozo, M., Milà-Guasch, M., Haddad-Tòvolli, R., Boudjadja, M. B., Chivite, I., Toledo, M., Gómez-Valadés, A. G., Eyre, E., Ramírez, S., Obri, A., Bartal, I. B., D'Agostino, G., Costa-Font, J., & Claret, M. (2023).	Negative energy balance hinders prosocial helping behavior.	Excluded	Wrong Context - The article does not address strategic decisions in a business context.	Social
Pratt-Williams, J. (2017).	Emotional decisions: Policy decisions on student support services in large districts and their impact on schools.	Excluded	Wrong Context - The article does not address strategic decisions in a business context.	Career / Education
Priem, R. L., & Price, K. H. (1991).	Process and outcome expectations for the dialectical inquiry, devil's advocacy, and consensus techniques of strategic decision making.	Excluded	Wrong Context - The article does not address strategic decisions in a business context.	Social
Provoost, V., Pennings, G., De Sutter, P., & Dhont, M. (2012).	"Something of the two of us". The emotionally loaded embryo disposition decision-making of patients who view their embryo as a symbol of their relationship.	Excluded	Wrong Context - The article does not address strategic decisions in a business context.	Health
Puffer, K. A. (2015).	Facilitating emotional awareness in a career counseling context.	Excluded	Wrong Context - The article does not address strategic decisions in a business context.	Health
Puffer, K. A., & Pence, K. G. (2020).	Behind dislike: Adaptive purposes for undergraduates' negative emotions in the career decision-making process.	Excluded	Wrong Population + Wrong Context - The article does not address strategic decisions in a business context.	Health
Pull, C. B. (2014).	Personality disorders in Diagnostic and Statistical Manual of Mental Disorders-5: Back to the past or back to the future?	Excluded	Wrong Context - The article does not address strategic decisions in a business context.	Health
Pulst, A., Fassmer, A. M., & Schmiemann, G. (2019).	Experiences and involvement of family members in transfer decisions from nursing home to hospital: A systematic review of qualitative research.	Excluded	Wrong Context - The article does not address strategic decisions in a business context.	Health
Purohit, P., Sassarini, J., & Lumsden, M. A. (2019).	Management of induced menopause in gynecological cancers and their challenges.	Excluded	Wrong Context - The article does not address strategic decisions in a business context.	Health
Putnam, L. L., Fairhurst, G. T., & Banghart, S. (2016).	Contradictions, dialectics, and paradoxes in organizations: A constitutive approach.	Included	Included	Included
Pyy, I., Leiviskä, A., & Mansikka, J. E. (2020).	Contesting the politics of negative emotions in educational policymaking: A ban on asylum seekers' school visits in Finland.	Excluded	Wrong Context - The article does not address strategic decisions in a business context.	Career / Education
Quan, G. M. Y., Vital, J. M., Aurouer, N., Obeid, I., Palussière, J., Diallo, A., & Pointillart, V. (2011).	Surgery improves pain, function and quality of life in patients with spinal metastases: A prospective study on 118 patients.	Excluded	Wrong Context - The article does not address strategic decisions in a business context.	Health
Quek, B. K., Ibañez-Guzmán, J., Lim, K. W., & IEEE. (2006).	A survivability framework for the development of autonomous unmanned systems.	Excluded	Wrong Publication Type	Conference Paper
Quinonez, B. (2018).	Influence of dual process decision-making theory in patients diagnosed with cancer.	Excluded	Wrong Context - The article does not address strategic decisions in a business context.	Health
Quintas, J. M. L. (2023).	Context-based human-machine interaction framework for artificial social companions.	Excluded	Wrong Context - The article does not address strategic decisions in a business context.	AI
Rahaman, S. F., Kobti, Z., Snowdon, A. W., & IEEE. (2010).	Artificial emotional intelligence under ethical constraints in formulating social agent behaviour.	Excluded	Wrong Publication Type	Conference Paper
Raines, J. C., & Dibble, N. T. (2021).	Ethical decision-making in school mental health, 2nd ed.	Excluded	Wrong Context - The article does not address strategic decisions in a business context.	Health
Ramirez-Pedraza, R., & Ramos, F. (2021).	Decision-making bioinspired model for target definition and "satisfactor" selection for physiological needs.	Excluded	Wrong Context - The article does not address strategic decisions in a business context.	Health
Ramirez, J., Gordon, M., Reissinger, M., Shah, A., Coverdale, J., & Nguyen, P. T. (2020).	The importance of maintaining medical professionalism while experiencing vicarious trauma when working with human trafficking victims.	Excluded	Wrong Context - The article does not address strategic decisions in a business context.	Health
Ramirez, K. Y. (2022).	A Latinx critical race theoretical approach to testimonios of Latinx school psychologists.	Excluded	Wrong Context - The article does not address strategic decisions in a business context.	Social
Ramos, A., Moors, A. C., Dours, N. O., & Jonathan, N. (2022).	Surface and complex representation of diverse intimate relationships: Insights from a content analysis of marriage and family therapy resources.	Excluded	Wrong Context - The article does not address strategic decisions in a business context.	Health
Ranasinghe, W., De Silva, D., Bandaragoda, T., Adikari, A., Alahakoon, D., Persad, R., Lawrentschuk, N., & Bolton, D. (2018).	Robotic-assisted versus open radical prostatectomy: A machine learning framework for intelligent analysis of patient-reported outcomes from online cancer support groups.	Excluded	Wrong Context - The article does not address strategic decisions in a business context.	Health
Rappaport, J. M., Richter, S. B., & Kennedy, D. T. (2018)	A strategic perspective on using symbolic transformation in STEM education: Robotics and automation.	Excluded	Wrong Context - The article does not address strategic decisions in a business context.	Health / AI
Rawles, J. D. (2018).	The decision-making process of Black males raised by single Black mothers: A grounded theory study.	Excluded	Wrong Context - The article does not address strategic decisions in a business context.	Social
Reagan Jr., D. W. (2021).	Individual difference as a factor in ethical decision-making.	Excluded	Wrong Context - The article does not address strategic decisions in a business context.	Social
Reckrey, J. M., McKee, M. D., Sanders, J. J., & Lipman, H. I. (2011).	Resident physician interactions with surrogate decision-makers: The resident experience.	Excluded	Wrong Context - The article does not address strategic decisions in a business context.	Career / Education
Redding, N. (2017).	Leadership complexity while navigating a complex conflict: Linking individual attributes with dynamic decision-making processes.	Excluded	Wrong Publication Type	Book
Redlinger-Grosse, K., Bernhardt, B. A., Berg, K., Muenke, M., & Biesecker, B. B. (2002).	The decision to continue: The experiences and needs of parents who receive a prenatal diagnosis of holoprosencephaly.	Excluded	Wrong Context - The article does not address strategic decisions in a business context.	Health
Regier, N. G., & Parmelee, P. A. (2022).	Perceived decisional control as a mediator between moving to assisted living due to caregiver burden and relocation adjustment.	Excluded	Wrong Context - The article does not address strategic decisions in a business context.	Health
Rego, F., Gonçalves, F., Moutinho, S., Castro, L., & Nunes, R. (2020).	The influence of spirituality on decision-making in palliative care outpatients: A cross-sectional study.	Excluded	Wrong Context - The article does not address strategic decisions in a business context.	Health
Regueiro, R., & León, O. G. (2003).	Estress en decisiones cotidianas. [Stress in personal decisions.].	Excluded	Wrong Context - The article does not address strategic decisions in a business context.	Social
Regueiro, R., & León, O. G. (2003).	Stress in personal decisions.	Excluded	Wrong Context - The article does not address strategic decisions in a business context.	Social
Repass, M. E. (2006).	The professional women's decision to retire: The process of transition.	Excluded	Wrong Context - The article does not address strategic decisions in a business context.	Social
Restrepo, D., & Gómez, A. (2017).	Short research advanced project: Development of strategies for automatic facial feature extraction and emotion recognition.	Excluded	Wrong Publication Type	Conference Paper
Richter, G., & Burchert, A. (2016).	Ethics council in oncology: Structure, framework conditions and limits.	Excluded	Wrong Context - The article does not address strategic decisions in a business context.	Health
Ricou, M., & Marina, S. (2020).	Decision making and ethical reasoning in psychology.	Excluded	Wrong Context - The article does not address strategic decisions in a business context.	Social
Riesinger, R., Altmann, K., & Lorenzl, S. (2021).	Involvement of specialist palliative care in a stroke unit in Austria: Challenges for families and stroke teams.	Excluded	Wrong Context - The article does not address strategic decisions in a business context.	Health
Riffin, C., Pillemer, K., Reid, M. C., & Löckenhoff, C. E. (2016).	Decision support preferences among Hispanic and non-Hispanic white older adults with chronic musculoskeletal pain.	Excluded	Wrong Context - The article does not address strategic decisions in a business context.	health
Rincon, J. A., Costa, A., Novais, P., Julian, V., & Carrascosa, C. (2020).	ME3CA: A cognitive assistant for physical exercises that monitors emotions and the environment.	Excluded	Wrong Context - The article does not address strategic decisions in a business context.	Health
Rió Benito, M. (2021).	Quand est-ce qu'on prescrit un antipsychotique à un patient migrant? Une étude rétrospective des dossiers cliniques des patients migrants sous antipsychotique suivis dans une consultation psychothérapeutique spécialisée. [When do we prescribe an antipsychotic to a migrant patient? A retrospective study of the patients taking an antipsychotic file in a mental health outpatient specialized clinic.].	Excluded	Wrong Context - The article does not address strategic decisions in a business context.	Health
Riou, F., Aubry, R., Pontone, S., & Pennec, S. (2015).	When physicians report having used medical drugs to deliberately end a patient's life: Findings of the End-of-Life in France survey.	Excluded	Wrong Context - The article does not address strategic decisions in a business context.	Health
Rispens, S., & Jehn, K. A. (2012).	The versatility of intrateam conflict: Construction and test of a Dutch instrument for measuring team conflict types and conflict dimensions.	Excluded	Wrong Context - The article does not address strategic decisions in a business context.	Social
Roberson, K. (2021).	North Star decision making.	Excluded	Wrong Context - The article does not address strategic decisions in a business context.	Decision / Emotion Theory
Roberto, K. A., Weeks, L. E., & Matheis-Kraft, C. (2001).	Health care decisions of older adults: Underlying influences, cognitive status, and perceived outcomes.	Excluded	Wrong Context - The article does not address strategic decisions in a business context.	Health
Roberts, M. (2021).	Embodied ethical decision-making: A clinical case study of respect for culturally based meaning making in mental healthcare.	Excluded	Wrong Context - The article does not address strategic decisions in a business context.	Health
Rodriguez-Cruz, Y., & Pinto, M. (2017).	Information requirements for strategic decision making in information organizations.	Included	Included	Included
Rodríguez-Dorans, E. (2018).	Reflexivity and ethical research practice while interviewing on sexual topics.	Excluded	Wrong Context - The article does not address strategic decisions in a business context.	Social
Roeser, S. (2006).	The role of emotions in judging the moral acceptability of risks.	Excluded	Wrong Context - The article does not address strategic decisions in a business context.	Decision / Emotion Theory
Rogers, C. C., Pope, S., Whitfield, F., Cohn, W. F., & Valdez, R. S. (2022).	The lived experience during the peri-diagnostic period of breast cancer: A scoping review.	Excluded	Wrong Context - The article does not address strategic decisions in a business context.	Health
Rolland, J. S., Emanuel, L. L., & Torke, A. M. (2017).	Applying a family systems lens to proxy decision making in clinical practice and research.	Excluded	Wrong Context - The article does not address strategic decisions in a business context.	Health
Romdhani, M., Kohler, S., Koskas, P., & Drunat, O. (2022).	Ethical dilemma for healthcare professionals facing elderly dementia patients during the COVID-19 pandemic.	Excluded	Wrong Context - The article does not address strategic decisions in a business context.	Health
Root-Gutteridge, H., Ratcliffe, V. F., Neumann, J., Timarchi, L., Yeung, C., Korzeniowska, A. T., Mathevon, N., & Reby, D. (2021).	Effect of pitch range on dogs' response to conspecific vs. heterospecific distress cries.	Excluded	Wrong Context - The article does not address strategic decisions in a business context.	Animal
Rose, G. M., Shoham, A., Neill, S., & Ruvio, A. (2007).	Manufacturer perceptions of the consequences of task and emotional conflict within domestic channels of distribution.	Excluded	Wrong Context - The article does not address strategic decisions in a business context.	Studies not focused on emotions and the strategic decision-making process
Rosenberg, S. M., Sepucha, K., Ruddy, K. J., Tamimi, R. M., Gelber, S., Meyer, M. E., Schapira, L., Come, S. E., Borges, V. F., Golshan, M., Winer, E. P., & Partridge, A. H. (2015).	Local therapy decision-making and contralateral prophylactic mastectomy in young women with early-stage breast cancer.	Excluded	Wrong Context - The article does not address strategic decisions in a business context.	Health
Ross, E. (2011).	Burnout and self-care in the practice of speech pathology and audiology: An ecological perspective.	Excluded	Wrong Context - The article does not address strategic decisions in a business context.	Health
Rossi, A., Scheunemann, M. M., L'Arco, G., & Rossi, S. (2021).	Evaluation of a humanoid robot's emotional gestures for transparent interaction.	Excluded	Wrong Publication Type	Conference Paper
Rousan, T. A., Mathew, S. T., & Thadani, U. (2017).	Drug therapy for stable angina pectoris.	Excluded	Wrong Context - The article does not address strategic decisions in a business context.	Health
Roy, P., Ramaprasad, B. S., Chakraborty, M., Prabhu, N., & Rao, S. L. (2020).	Customer acceptance of use of artificial intelligence in hospitality services: An Indian hospitality sector perspective.	Excluded	Wrong Context - The article does not address strategic decisions in a business context.	Social
Rubin, D. T., Hart, A., Panaccione, R., Armuzzi, A., Suvanto, U., Deuring, J. J., Woolcott, J., Cappelleri, J. C., Steinberg, K., Wingate, L., & Schreiber, S. (2021).	Ulcerative colitis narrative global survey findings: Communication gaps and agreements between patients and physicians.	Excluded	Wrong Context - The article does not address strategic decisions in a business context.	Health
Ryan, A. A., & Scullion, H. F. (2000).	Nursing home placement: An exploration of the experiences of family carers.	Excluded	Wrong Context - The article does not address strategic decisions in a business context.	Health
Saade, M., Davies, J., Torres, E., Morales-Otero, L., Gonzalez-Caraballo, Z., & Santiago-Delpin, E. A. (2005).	A marked increase in organ donation in Puerto Rico.	Excluded	Wrong Context - The article does not address strategic decisions in a business context.	Health
Sabuj, M. S., Afrin, Z., & Hasan, K. M. A. (2017).	Opinion mining using support vector machine with web-based diverse data.	Excluded	Wrong Publication Type	Conference Paper
Sachdev, P. S., & Malhi, G. S. (2005).	Obsessive-compulsive behavior: A disorder of decision-making.	Excluded	Wrong Context - The article does not address strategic decisions in a business context.	Health
Saddler, Y., & Sundin, E. C. (2020).	Mature students' journey into higher education in the UK: An interpretative phenomenological analysis.	Excluded	Wrong Context - The article does not address strategic decisions in a business context.	Career / Education
Sadovykh, V., & Sundaram, D. (2015).	Decision making and support in healthcare online social networks.	Excluded	Wrong Publication Type	Health
Sadovykh, V., Sundaram, D., & Piramuthu, S. (2015).	Do decision-making structure and sequence exist in health online social networks?	Excluded	Wrong Context - The article does not address strategic decisions in a business context.	Health
Sadovykh, V., Sundaram, D., & Piramuthu, S. (2015).	Do online social networks support decision-making?	Excluded	Wrong Context - The article does not address strategic decisions in a business context.	Social
Sáez-Francàs, N., Hernández-Vara, J., Corominas-Roso, M., Alegre, J., Jacas, C., & Casas, M. (2014).	Relationship between poor decision-making process and fatigue perception in Parkinson's disease patients.	Excluded	Wrong Context - The article does not address strategic decisions in a business context.	Health
Sagini, D. O., & Aboulafia, A. J. (2005).	Palliative care and orthopedics: What is on the horizon?	Excluded	Wrong Context - The article does not address strategic decisions in a business context.	Health
Saleh, S. H., & Hunt, R. A. (2020)	The role of heuristics and biases in entrepreneurial decision-making when creativity is a necessity.	Excluded	Wrong Publication Type	Book Chapter
Saleh, T. A., Sarwar, A., Islam, M. A., & Mohiuddin, M., & Su, Z. (2022).	Effects of leader conscientiousness and ethical leadership on employee turnover intention: The mediating role of individual ethical climate and emotional exhaustion.	Excluded	Wrong Context - The article does not address strategic decisions in a business context.	Social
Salgado, R. M. S. (2022).	Emotions in the European Union's decision-making: The reform of the Dublin system in the context of the refugee crisis.	Excluded	Wrong Context - The article does not address strategic decisions in a business context.	Social
Salichs, M. A., & Malfaz, M. (2012).	A new approach to modeling emotions and their use on a decision-making system for artificial agents.	Excluded	Wrong Context - The article does not address strategic decisions in a business context.	Health / AI
Salvador, A. B., Parra, E. P., & Silva-Castro, M. M. (2021).	Counseling integrated with comprehensive medication management: Emotion management of chronic diseases.	Excluded	Wrong Context - The article does not address strategic decisions in a business context.	Health
Salvato, G., De Maio, G., & Bottini, G. (2019).	Interoceptive sensibility tunes risk-taking behaviour when body-related stimuli come into play.	Excluded	Wrong Context - The article does not address strategic decisions in a business context.	Social
Samant, R., Cisa-Paré, E., Balchin, K., Renaud, J., Bunch, L., Wheatley-Price, P., McNeil, A., Murray, S., & Meng, J. (2022).	Assessment of patient satisfaction among cancer patients undergoing radiotherapy.	Excluded	Wrong Context - The article does not address strategic decisions in a business context.	Health
Samuel, R. D., Tenenbaum, G., Mangel, E., Virshuvski, R., Chen, T., & Badir, A. (2015).	Athletes' experiences of severe injuries as a career-change event.	Excluded	Wrong Context - The article does not address strategic decisions in a business context.	Health
Sanders, R., & Lehmann, J. (2019).	An exploratory study of clients' experiences and preferences for counselling room space and design.	Excluded	Wrong Context - The article does not address strategic decisions in a business context.	Social
Santos-Ruiz, A., Garcia-Rios, M. C., Fernandez-Sanchez, J. C., Perez-Garcia, M., Muñoz-García, M. A., & Peralta-Ramirez, M. I. (2012).	Can decision-making skills affect responses to psychological stress in healthy women?	Excluded	Wrong Context - The article does not address strategic decisions in a business context.	Health
Santos, A., Wang, W., & Lewis, J. (2018).	Emotional intelligence and career decision-making difficulties: The mediating role of career decision self-efficacy.	Excluded	Wrong Context - The article does not address strategic decisions in a business context.	Health
Saposnik, G., Del Río, B., Bueno-Gil, G., Sempere, A. P., Lendínez-Mesa, A., Rodríguez-Antigüedad, A., Terzaghi, M., Medrano, N., & Maurino, J. (2021).	Behavioral aspects of nurse practitioners associated with optimal multiple sclerosis care in Spain.	Excluded	Wrong Context - The article does not address strategic decisions in a business context.	Health
Savci, P., & Das, B. (2023).	Prediction of the customers' interests using sentiment analysis in e-commerce data for comparison of Arabic, English, and Turkish languages.	Excluded	Wrong Context - The article does not address strategic decisions in a business context.	Social
Sawers, K. M. (2005).	Evidence of choice avoidance in capital-investment judgements.	Included	Included	Included
Sayginer, C., & Kurtsan, K. (2022).	An extended decision-making model of coastal recreational area use during the COVID-19 through goal-directed behavior and perceived benefits framework.	Excluded	Wrong Context - The article does not address strategic decisions in a business context.	Social
Schachner, S. K. (2009).	Clinical and cultural barriers to psychological help seeking in African American college students.	Excluded	Wrong Context - The article does not address strategic decisions in a business context.	Health
Schoefs, E., Vermeire, S., Ferrante, M., Sabino, J., Lambrechts, T., Avedano, L., Haaf, I., De Rocchis, M. S., Broggi, A., Sajak-Szczerba, M., Saldaña, R., Janssens, R., Huys, I. (2023).	What are the unmet needs and most relevant treatment outcomes according to patients with inflammatory bowel disease? A qualitative patient preference study.	Excluded	Wrong Context - The article does not address strategic decisions in a business context.	Health
Schumacher, F. A., Helenowski, I. B., Sun, Z. Q., Oswald, L. B., Gonzalez, B. D., Moses, K. A., Benning, J. T., Morgans, A. K. (2023).	Treatment decision-making among patients with metastatic prostate cancer: Impact of decision locus of control on functional outcomes and decision satisfaction.	Excluded	Wrong Context - The article does not address strategic decisions in a business context.	Health
Scott, J., Weatherhead, S., & Manthorpe, J. (2021).	Operationalizing the deprivation of liberty safeguards (DoLS) in support of brain injury survivors: Views from practice.	Excluded	Wrong Context - The article does not address strategic decisions in a business context.	Social
Sebri, V., Triberti, S., & Pravettoni, G. (2023).	The self's choice: Priming attentional focus on bodily self promotes loss frequency bias.	Excluded	Wrong Context - The article does not address strategic decisions in a business context.	Health
Sedin, A., Isaksson, J., & Patel, H. (2023).	The experience of transitioning into life-sustaining treatment: A systematic literature review.	Excluded	Wrong Context - The article does not address strategic decisions in a business context.	Health
Segerer, R., Peschel, C., Kämmerer, U., Häussler, S., Wöckel, A., & Segerer, S. (2020).	Factors impacting on decision-making towards prophylactic surgeries in BRCA mutation carriers and women with familial predisposition.	Excluded	Wrong Context - The article does not address strategic decisions in a business context.	Health
Seo, H., Kim, S., Cai, X., Abe, H., Donahue, C. H., & Lee, D. (2017)	Neural correlates of strategic decision-making in the primate prefrontal cortex.	Excluded	Wrong Publication Type	Book Chapter
Serek, J., Muzík, M., Lomicová, L., & Juhová, D. S. (2022).	How a direct vote and public deliberation contribute to the legitimacy of political decision-making: Examining situational and individual-level moderators.	Excluded	Wrong Context - The article does not address strategic decisions in a business context.	Social
Seth, S. G., Goka, T., Harbison, A., Hollier, L., Peterson, S., Ramondetta, L., & Noblin, S. J. (2011).	Exploring the role of religiosity and spirituality in amniocentesis decision-making among Latinas.	Excluded	Wrong Context - The article does not address strategic decisions in a business context.	Health
Sevy, S., Hassoun, Y., Bechara, A., Yechiam, E., Napolitano, B., Burdick, K., Delman, H., & Malhotra, A. (2006).	Emotion-based decision-making in healthy subjects: Short-term effects of reducing dopamine levels.	Excluded	Wrong Context - The article does not address strategic decisions in a business context.	Health
Shafer, A. (2005).	Meta-analysis of the brief psychiatric rating scale factor structure.	Excluded	Wrong Context - The article does not address strategic decisions in a business context.	Health
Shah, P., Catmur, C., & Bird, G. (2016).	Emotional decision-making in autism spectrum disorder: The roles of interoception and alexithymia.	Excluded	Wrong Context - The article does not address strategic decisions in a business context.	Health
Shan, H. Y., Saharso, S., van Kroonenburg, N., & Henrichs, J. (2023).	Understanding the relationship between maternity care providers and middle-class Chinese migrant women in the Netherlands: A qualitative study.	Excluded	Wrong Context - The article does not address strategic decisions in a business context.	Health
Shang, H. Y., Feng, P. P., Zhang, J., & Chu, H. R. (2023).	Calm or panic? A game-based method of emotion contagion for crowd evacuation.	Excluded	Wrong Context - The article does not address strategic decisions in a business context.	Social
Sharma, S. N., & Khan, A. (2021).	Intertemporal preference reversals are associated with early activation of insula and sustained preferential processing of immediate rewards in visual cortex.	Excluded	Wrong Context - The article does not address strategic decisions in a business context.	Health
Sherman, K. A., Shaw, L.-K., Jørgensen, L., Harcourt, D., Cameron, L., Boyages, J., Elder, E., Kirk, J., & Tucker, K. (2017).	Qualitatively understanding patients' and health professionals' experiences of the BRECONDA breast reconstruction decision aid.	Excluded	Wrong Context - The article does not address strategic decisions in a business context.	Health
Shiller, A. V. (2020).	The place of the ethical system in the architecture of artificial intelligence.	Excluded	Wrong Context - The article does not address strategic decisions in a business context.	AI
Shim, J. (2007).	Active/inactive emotional switching for thinking chain extraction by type matching from RAS.	Excluded	Wrong Publication Type	Conference Paper
Shin, D. (2021).	The effects of explainability and causability on perception, trust, and acceptance: Implications for explainable AI.	Excluded	Wrong Context - The article does not address strategic decisions in a business context.	AI
Shin, Y. A., & Hyun, Y. R. (2022).	What matters to citizens in crisis recovery? Being listened to, action, and confidence in government.	Excluded	Wrong Context - The article does not address strategic decisions in a business context.	Social
Shiraiwa, Y., & Karasawa, K. (2013).	The effect of the victim participant's statements and people's attitudes to victim participation on sentencing decisions.	Excluded	Wrong Context - The article does not address strategic decisions in a business context.	Social / Legal
Shoss, M. K., Jundt, D. K., Kobler, A., & Reynolds, C. (2016).	Doing bad to feel better? An investigation of within- and between-person perceptions of counterproductive work behavior as a coping tactic.	Excluded	Wrong Context - The article does not address strategic decisions in a business context.	Incluir
Shozi, Z., Saloojee, S., & Mashaphu, S. (2023).	Experiences of coercion amongst involuntary mental health care users in KwaZulu-Natal, South Africa.	Excluded	Wrong Context - The article does not address strategic decisions in a business context.	Health
Silic, M., Njavro, M., & Oblakovic, G. (2017).	Understanding color risk appropriateness: Influence of color on a user's decision to comply with the IT security policy: Evidence from the US and India.	Excluded	Wrong Publication Type	Conference Paper
Simeoni, M., Saragosa, M., Laur, C., Desveaux, L., Schwartz, K., & Ivers, N. (2022).	Coping with ‘the grey area’ of antibiotic prescribing: A theory-informed qualitative study exploring family physician perspectives on antibiotic prescribing.	Excluded	Wrong Context - The article does not address strategic decisions in a business context.	Health
Siminoff, L. A., Graham, G. C., & Gordon, N. H.	Cancer communication patterns and the influence of patient characteristics: Disparities in information-giving and affective behaviors.	Excluded	Wrong Context - The article does not address strategic decisions in a business context.	Health
Simon, D., Loh, A., Wills, C. E., & Härter, M. (2007).	Depressed patients' perceptions of depression treatment decision-making.	Excluded	Wrong Context - The article does not address strategic decisions in a business context.	Health
Sinclair, M., Ashkanasy, N. M., Chattopadhyay, P., & Boyle, M. V. (2002).	Determinants of intuitive decision making in management: The moderating role of affect.	Excluded	Wrong Publication Type	Conference Paper
Skeith, L., Rodger, M. A., Bates, S. M., Gonsalves, C., Karovitch, A., & Taylor, T. S. (2021).	"Part of the ritual": Exploring patient and physician decision making regarding anticoagulation use in obstetric antiphospholipid syndrome.	Excluded	Wrong Context - The article does not address strategic decisions in a business context.	Health
Skyring, T. A., Mansfield, K. J., & Mullan, J. R. (2021).	Factors affecting satisfaction with the decision-making process and decision regret for men with a new diagnosis of prostate cancer.	Excluded	Wrong Context - The article does not address strategic decisions in a business context.	Health
Smith, M., Vogler, J., Zarrouf, F., Sheaves, C., & Jesse, J. (2009).	Electroconvulsive therapy: The struggles in the decision-making process and the aftermath of treatment.	Excluded	Wrong Context - The article does not address strategic decisions in a business context.	Health
So, O. W., Shaw, R., O'Rourke, L., Woldegabriel, J. T., Wade, B., Quesnel, M., & Mori, B. (2019).	Clinical instructors' experiences working with and assessing students who perform below expectations in physical therapy clinical internships.	Excluded	Wrong Context - The article does not address strategic decisions in a business context.	Health
Soboti, J. M. (2023).	"If you are going to step on this campus, you have to get vaccinated": A qualitative understanding of COVID-19 vaccine hesitancy among Black emerging adults returning to college campuses.	Excluded	Wrong Context - The article does not address strategic decisions in a business context.	Health
Sollárová, E. (2017).	Career indecision and career decision-making difficulties of students and unemployed graduates.	Excluded	Wrong Publication Type	Health
Solomon, J. L. (2013).	The decision space worksheet, the career thoughts inventory, and the Beck Depression Inventory-II as measures of mental health in the career decision-making process.	Excluded	Wrong Context - The article does not address strategic decisions in a business context.	Health
Somers, E., Grey, C., & Satkoske, V. (2016).	Withholding versus withdrawing treatment: Artificial nutrition and hydration as a model.	Excluded	Wrong Context - The article does not address strategic decisions in a business context.	Health
Sorgi, K. M., & Van't Wout, M. (2016).	The influence of cooperation and defection on social decision making in depression: A study of the iterated prisoner's dilemma game.	Excluded	Wrong Context - The article does not address strategic decisions in a business context.	Social
Sparbel, K. J. H., & Williams, J. K. (2009).	Pregnancy as foreground in cystic fibrosis carrier testing decisions in primary care.	Excluded	Wrong Context - The article does not address strategic decisions in a business context.	Health
Spek, B., Wieringa-de Waard, M., Lucas, C., & van Dijk, N. (2013).	Teaching evidence-based practice (EBP) to speech-language therapy students: Are students competent and confident EBP users?	Excluded	Wrong Context - The article does not address strategic decisions in a business context.	Health
Springer, S., Sandoe, P., Grimm, H., Corr, S. A., Kristensen, A. T., & Lund, T. B. (2021).	Managing conflicting ethical concerns in modern small animal practice: A comparative study of veterinarian's decision ethics in Austria, Denmark, and the UK.	Excluded	Wrong Context - The article does not address strategic decisions in a business context.	Animal
Sque, M., & Payne, S. A. (1996).	Dissonant loss: The experiences of donor relatives.	Excluded	Wrong Context - The article does not address strategic decisions in a business context.	Health
Srirangam, S. J., Pearson, E., Grose, C., Brown, S. C. W., Collins, G. N., & O'Reilly, P. H. (2003).	Partner's influence on patient preference for treatment in early prostate cancer.	Excluded	Wrong Context - The article does not address strategic decisions in a business context.	Health
Staal, M. A., Cigrang, J. A., & Fiedler, E. (2000).	Disposition decisions in US Air Force basic trainees assessed during mental health evaluations.	Excluded	Wrong Context - The article does not address strategic decisions in a business context.	Health
Stanovov, V., Akhmedova, S., & Kamiya, Y. (2020).	Confidence-based voting for the design of interpretable ensembles with fuzzy systems.	Excluded	Wrong Context - The article does not address strategic decisions in a business context.	Social
Starnes, W., Kopetz, C., & Johnson, M. (2021).	For better and for worse: The role of negative affect in decisions to drink and drive.	Excluded	Wrong Context - The article does not address strategic decisions in a business context.	Social
Steel, Z., Frommer, N., & Silove, D. (2004).	Part I: The mental health impacts of migration: The law and its effects failing to understand: Refugee determination and the traumatized applicant.	Excluded	Wrong Context - The article does not address strategic decisions in a business context.	Health
Steeves, J. A. M. (2019).	Decision-making in United Nations peacekeeping operations: Understanding the social processes that influenced decision-making in the United Nations mission in South Sudan from January to September 2014.	Excluded	Wrong Context - The article does not address strategic decisions in a business context.	Social
Stefanska, E. B., & Tehan, S. N. (2022).	After a storm comes a calm: International expert decision-making process regarding abstract definitions of emotional cool-off periods in sexual homicide.	Excluded	Wrong Context - The article does not address strategic decisions in a business context.	Legal
Stembridge Gainer, P. (2018).	The effects of emotional intelligence on productivity.	Excluded	Wrong Context - The article does not address strategic decisions in a business context.	Incluir
Stewart, M., Meredith, L., Brown, J. B., & Galajda, J. (2000).	The influence of older patient-physician communication on health and health-related outcomes.	Excluded	Wrong Context - The article does not address strategic decisions in a business context.	Health
Stewart, T. (2014).	Review of Stammering therapy from the inside.	Excluded	Wrong Publication Type	Health
Stewart, T. M. (2023).	Nature and extent of mental health problems among men with newly diagnosed prostate cancer and investigation of the association of mental health status with quality of decision making following diagnosis.	Excluded	Wrong Context - The article does not address strategic decisions in a business context.	Health
Stock, N. M., Sharratt, N. D., Treneman-Evans, G., Montgomery, K., Denman, R., Harcourt, D., & VTCTFdn Res Team Ctr Appearance. (2022).	‘My face in someone else's hands’: A qualitative study of medical tattooing in women with hair loss.	Excluded	Wrong Context - The article does not address strategic decisions in a business context.	Health
Stolper, C. F., van de Wiel, M. W. J., van Bokhoven, M. A., van der Weijden, T., Dinant, G. J., & Van Royen, P. (2012).	Thirteenth tip for teaching expertise in clinical reasoning.	Excluded	Wrong Context - The article does not address strategic decisions in a business context.	Health
Stone, N. I., & Downe, S. (2023).	Women's experience of early labour in a free-standing birth centre: Midwifing embodied labour.	Excluded	Wrong Context - The article does not address strategic decisions in a business context.	Health
Su, C., Gao, Y., Jiang, B. X., & Li, H. G. (2018).	An affective cognition based approach to multi-attribute group decision making.	Excluded	Wrong Context - The article does not address strategic decisions in a business context.	Health
Sui, W. J., Gong, X. Y., Qiao, X. T., Zhang, L. X., Cheng, J. N., Dong, J., & Zhuang, Y. Y. (2023).	Family members' perceptions of surrogate decision-making in the intensive care unit: A systematic review.	Excluded	Wrong Context - The article does not address strategic decisions in a business context.	Health
Sun, W. N., Hsu, H. T., Ko, N. Y., & Huang, Y. T. (2020).	Decision-making processes in surrogates of cancer patients in a Taiwan intensive care unit.	Excluded	Wrong Context - The article does not address strategic decisions in a business context.	Health
Sur, S. D., & Raine-Fenning, N. J. (2009).	The management of miscarriage.	Excluded	Wrong Context - The article does not address strategic decisions in a business context.	Health
Sütfeld, L. R., Gast, R., König, P., & Pipa, G. (2017).	Using virtual reality to assess ethical decisions in road traffic scenarios: Applicability of value-of-life-based models and influences of time pressure.	Excluded	Wrong Context - The article does not address strategic decisions in a business context.	Social
Swartjes, B., Berkers, P., Haynes, J., Woodward, I., & Mogilnicka, M. (2023).	Uncertain festival futures: How European music festival organizers navigate 'loss'.	Excluded	Wrong Context - The article does not address strategic decisions in a business context.	Social
Swartwood, R. M. (2015).	Who should I bring? A qualitative examination of the role of the support person in the cancer genetic counseling appointment.	Excluded	Wrong Context - The article does not address strategic decisions in a business context.	Health
Sweeney, P. J., Lee, D. R., Briggs, H., & ASEM. (2000).	Emotional intelligence and influence tactics: A pilot study.	Excluded	Wrong Publication Type	Conference Paper
Synofzik, M. (2006).	Kognition à la carte?: Der wunsch nach kognitionsverbessernden psychopharmaka in der medizin. [Cognition on demand?: The wish for cognition-enhancing drugs in medicine.].	Excluded	Wrong Context - The article does not address strategic decisions in a business context.	Health
Syrous, A. N., Malmgren, J., Hergès, H. O., Olausson, S., Kock-Redfors, M., Ågård, A., & Block, L. (2021).	Reasons for physician-related variability in end-of-life decision-making in intensive care.	Excluded	Wrong Context - The article does not address strategic decisions in a business context.	Health
Ta, X. H., Gaudou, B., Longin, D., Amouroux, E., & Ho, T. V. (2016).	Emotion in the evacuation process formal model and simulation.	Excluded	Wrong Publication Type	Conference Paper
Taioli, E., Joseph, G. R., Robertson, L., Eckstein, S., & Ragin, C. (2014).	Knowledge and prevention practices before breast cancer diagnosis in a cross-sectional study among survivors: Impact on patients' involvement in the decision making process.	Excluded	Wrong Context - The article does not address strategic decisions in a business context.	Health
Tallon, J. A. (2009).	Understanding the role of defendant apology as a potential response to victim impact statements.	Excluded	Wrong Context - The article does not address strategic decisions in a business context.	Social / Legal
Tamme, J. A., Rohnen, M., Gassling, V., Ciesielski, R., Fischer-Brandies, H., Wiltfang, J., & Koos, B. (2017).	Correlation of general and oral health-related quality of life in malocclusion patients treated with a combined orthodontic and maxillofacial surgical approach.	Excluded	Wrong Context - The article does not address strategic decisions in a business context.	Health
Tang, Y., Qu, J. T., Wu, J., Liu, H., Chu, T. W., Xiao, J. R., & Zhou, Y. (2016).	Effect of surgery on quality of life of patients with spinal metastasis from non-small-cell lung cancer.	Excluded	Wrong Context - The article does not address strategic decisions in a business context.	Health
Tanna, D., Dudhane, M., Sardar, A., Deshpande, K., Deshmukh, N., & IEEE. (2020).	Sentiment analysis on social media for emotion classification.	Excluded	Wrong Publication Type	Conference Paper
Tao, Y. Q., Dong, J., Niu, H. Q., Lv, Y. C., He, X. Y., Zhang, S., & Liu, X. P. (2023).	Fear facilitates utilitarian moral judgments: Evidence from a moral judgment task.	Excluded	Wrong Context - The article does not address strategic decisions in a business context.	Social
Tarr, P. (2007).	Epupa dam case study.	Excluded	Wrong Context - The article does not address strategic decisions in a business context.	Social / Environmental
Tay, K., Frommer, N., Hunter, J., Silove, D., Pearson, L., Roque, M. S., Redman, R., Bryant, R. A., & Manicavasagar, V. (2013).	A mixed-method study of expert psychological evidence submitted for a cohort of asylum seekers undergoing refugee status determination in Australia.	Excluded	Wrong Context - The article does not address strategic decisions in a business context.	Health
Taylor-Robinson, S. D., Dykes, K., & Hawkes, B. (2020).	Personal perspectives: Having a prostatectomy and the role of the cancer specialist nurse.	Excluded	Wrong Context - The article does not address strategic decisions in a business context.	Health
Taylor, A. K., Kingstone, T., Briggs, T. A., O'Donnell, C. A., Atherton, H., Blane, D. N., & Chew, Graham, C. A. (2021).	‘Reluctant pioneer’: A qualitative study of doctors' experiences as patients with long COVID.	Excluded	Wrong Context - The article does not address strategic decisions in a business context.	Health
Taylor, L. A. (2003).	The relationship between shame and leave-taking behavior, duration of violent relationship, social support-seeking, attributions, emotional abuse, sexual assault, and PTSD symptoms in battered women.	Excluded	Wrong Context - The article does not address strategic decisions in a business context.	Health
Tenenbaum, G., & Gershgoren, L. (2014)	Individual and team decision-making.	Excluded	Wrong Publication Type	Book Chapter
Ternes, M. S. (2020).	The relationship between hope and stigma in the decision to seek mental health treatment.	Excluded	Wrong Context - The article does not address strategic decisions in a business context.	Health
Thalmann, N. M., Tian, L., & Yao, F. P. (2017).	Nadine: A social robot that can localize objects and grasp them in a human way.	Excluded	Wrong Publication Type	Conference Paper
Thomas, R., Scott, A. M., Sims, R., Craig, L., Claase, L. A., Lowe, J., Heal, C., Hardiman, L., & Glasziou, P. (2020).	Exploring women's priorities for the potential consequences of a gestational diabetes diagnosis: A pilot community jury.	Excluded	Wrong Context - The article does not address strategic decisions in a business context.	Health
Thompson, H. L. (2010)	The stress effect: Why smart leaders make dumb decisions and what to do about it.	Excluded	Wrong Publication Type	Book
Timmermans, D. R. M., Ockhuysen-Vermey, C. F., & Henneman, L. (2008).	Presenting health risk information in different formats: The effect on participants' cognitive and emotional evaluation and decisions.	Excluded	Wrong Context - The article does not address strategic decisions in a business context.	Health
Tjärnström, E., Weber, E. M., Hultgren, J., & Röcklinsberg, H. (2018).	Emotions and ethical decision-making in animal ethics committees.	Excluded	Wrong Context - The article does not address strategic decisions in a business context.	Animal
Tjersland, O. A. (1997).	Strategies in mediation explored and developed during a research project.	Excluded	Wrong Context - The article does not address strategic decisions in a business context.	Career / Education
Tomaszewski, K. A., Henry, B. M., Paradowski, J., Klosinski, M., Walocha, E., Golec, J., Kucharska, E., & Dudkiewicz, Z. (2015).	Cross-cultural adaptation of the English version of the IOF-QLQ to Polish, to assess the health-related quality-of-life of patients after a distal radius fracture.	Excluded	Wrong Context - The article does not address strategic decisions in a business context.	Health
Tomczak, P., & Zjawiony, P. (2018).	The influence of affect on the decision-making process in virtual simulation.	Excluded	Wrong Context - The article does not address strategic decisions in a business context.	Decision / Emotion Theory
Tomkow, L., Dewhurst, F., Hubmann, M., Straub, C., Damisa, E., Hanratty, B., & Todd, C. (2023).	‘That's as hard a decision as you will ever have to make’: The experiences of people who discussed Do Not Attempt Cardiopulmonary Resuscitation on behalf of a relative during the COVID-19 pandemic.	Excluded	Wrong Context - The article does not address strategic decisions in a business context.	Health
Tonkovic, M., Dumancic, F., & Andel, M. (2019).	Foreign language effect and moral decision making.	Excluded	Wrong Context - The article does not address strategic decisions in a business context.	Social
Toth, K. E., Yvon, F., Villotti, P., Lecomte, T., Lachance, J. P., Kirsh, B., Stuart, H., Berbiche, D., & Corbière, M. (2022).	Disclosure dilemmas: How people with a mental health condition perceive and manage disclosure at work.	Excluded	Wrong Context - The article does not address strategic decisions in a business context.	Health
Traczyk, J., Lenda, D., Serek, J., Fulawka, K., Tomczak, P., Strizyk, K., Polec, A., Zjawiony, P., & Sobkow, A. (2018).	Does fear increase search effort in more numerate people? An experimental study investigating information acquisition in a decision from experience task.	Excluded	Wrong Context - The article does not address strategic decisions in a business context.	Social
Traeder, T. L. (2015)	Cancer communication, uncertainty, and patient satisfaction: Investigating the effect of patient navigators on the breast cancer treatment decision-making process.	Excluded	Wrong Publication Type + Wrong Context	Dissertation / Health
Trammel, R. C. (2015).	Mindfulness as enhancing ethical decision-making and the Christian integration of mindful practice.	Excluded	Wrong Context - The article does not address strategic decisions in a business context.	Social
Tran, V. (2007).	The use, overuse, and misuse of affect, mood, and emotion in organizational research.	Excluded	Wrong Publication Type	Conference Paper
Treffers, T., & Putora, P. M. (2020).	Emotions as social information in shared decision-making in oncology.	Excluded	Wrong Context - The article does not address strategic decisions in a business context.	Health
Treffers, T., Klarner, P., & Huy, Q. N. (2020).	Emotions, time, and strategy: The effects of happiness and sadness on strategic decision-making under time constraints.	Included	Included	Included
Tripodi, F. (2021)	Sexual interview: Mental health and relationship issues.	Excluded	Wrong Context - The article does not address strategic decisions in a business context.	Health
Tyner, T. E., & Freysteinson, W. M. (2022).	A concept analysis of decision regret in women with breast cancer.	Excluded	Wrong Context - The article does not address strategic decisions in a business context.	Health
Tzartzas, K., Oberhauser, P. N., Marion-Veyron, R., Bourquin, C., Senn, N., & Stiefel, F. (2019).	General practitioners referring patients to specialists in tertiary healthcare: A qualitative study.	Excluded	Wrong Context - The article does not address strategic decisions in a business context.	Health
Ueichi, H., Kuriyama, N., Saito, T., & Kusumi, T. (2012).	Effects of the deliberate decision-making style on career decision-making processes and coping with regret after high school.	Excluded	Wrong Context - The article does not address strategic decisions in a business context.	Health
Ullah, N., Treur, J., & Koole, S. L. (2021)	Flexibility and adaptivity of emotion regulation: From contextual dynamics to adaptation and control.	Excluded	Wrong Publication Type	Book Chapter
Unruh, M. L., Weisbord, S. D., & Kimmel, P. L. (2005).	Health-related quality of life in nephrology research and clinical practice.	Excluded	Wrong Context - The article does not address strategic decisions in a business context.	Health
Ural, S. E., Akbay, S., & Altay, B. (2017).	Progression of color decision making in introductory design education.	Excluded	Wrong Context - The article does not address strategic decisions in a business context.	Career / Education
Vachon, B., Durand, M. J., & LeBlanc, J. (2010).	Using reflective learning to improve the impact of continuing education in the context of work rehabilitation.	Excluded	Wrong Context - The article does not address strategic decisions in a business context.	Career / Education
Valacich, J. S., & Schwenk, C. (1995).	Structuring conflict in individual, face-to-face, and computer-mediated group decision making: Carping versus objective devil's advocacy.	Excluded	Wrong Context - The article does not address strategic decisions in a business context.	Social
Valdes-Stauber, J. (2019).	Compulsive treatment in psychiatry and self-determination: Anthropology of a liminal encounter.	Excluded	Wrong Context - The article does not address strategic decisions in a business context.	Health
Valdes-Stauber, J. (2019).	Zwangsbehandlung in der Psychiatrie und Selbstbestimmungsfähigkeit: Anthropologie einer Grenzbegegnung. [Compulsive treatment in psychiatry and self-determination: Anthropology of a liminal encounter.]	Excluded	Wrong Context - The article does not address strategic decisions in a business context.	Health
Valikhani, M., & Sourkounis, C. (2014).	A novel intelligent controller for DFIG-based wind turbine system.	Excluded	Wrong Publication Type	Conference Paper
Vallano, J. P., Winter, R. J., & Charman, S. D. (2013).	Is this injury reasonable? Do psychological injury expectations affect mock jurors' legal decisions in a sexual harassment case?	Excluded	Wrong Context - The article does not address strategic decisions in a business context.	Legal
Van Bogaert, P., Kowalski, C., Weeks, S. M., Van Heusden, D., & Clarke, S. P. (2013).	The relationship between nurse practice environment, nurse work characteristics, burnout and job outcome and quality of nursing care: A cross-sectional survey.	Excluded	Wrong Context - The article does not address strategic decisions in a business context.	Health
Van Dijk, S., Van Roosmalen, M. S., Otten, W., & Stalmeier, P. F. M. (2008).	Decision making regarding prophylactic mastectomy: Stability of preferences and the impact of anticipated feelings of regret.	Excluded	Wrong Context - The article does not address strategic decisions in a business context.	Health
Van Es, R. M. S., Van Doorn, J., Kunst, M. J. J., & De Keijser, J. W. (2023).	Opening the black box of judicial decision-making in cases with forensic mental health reports: A qualitative study from the Netherlands.	Excluded	Wrong Context - The article does not address strategic decisions in a business context.	Health
Van Gurp, J. L. P., Van Lent, L. G. G., Stoel, N., Van der Rijt, C. C. D., De Jonge, M. J. A., Pulleman, S. M., Van Weert, J. C. M., & Hasselaar, J. (2022).	Core values of patients with advanced cancer considering participation in an early-phase clinical trial: A qualitative study.	Excluded	Wrong Context - The article does not address strategic decisions in a business context.	Health
Van Prooijen, J. W., De Cremer, D., van Beest, I., Stahl, T., van Dijke, M., & Van Lange, P. A. M. (2008).	The egocentric nature of procedural justice: Social value orientation as moderator of reactions to decision-making procedures.	Excluded	Wrong Context - The article does not address strategic decisions in a business context.	Social / Legal
Van't Wout, M. (2011).	Game theory and the brain neural modulation and lesion studies as a tool to examine interpersonal decision-making.	Excluded	Wrong Publication Type	Closed Access
Van't Wout, M., & Sanfey, A. G. (2008).	Friend or foe: The effect of implicit trustworthiness judgments in social decision-making.	Excluded	Wrong Context - The article does not address strategic decisions in a business context.	Social
Van't Wout, M., Chang, L. J., & Sanfey, A. G. (2010).	The influence of emotion regulation on social interactive decision-making.	Excluded	Wrong Context - The article does not address strategic decisions in a business context.	Decision / Emotion Theory
Van't Wout, M., Kahn, R. S., Sanfey, A. G., & Aleman, A. (2005).	Repetitive transcranial magnetic stimulation over the right dorsolateral prefrontal cortex affects strategic decision-making.	Excluded	Wrong Context - The article does not address strategic decisions in a business context.	Health
Vandamme, J., Wyverkens, E., Buysse, A., Vrancken, C., & Brondeel, R. (2013).	Pre-abortion counselling from women's point of view.	Excluded	Wrong Context - The article does not address strategic decisions in a business context.	Health / Social
Vanderhaeghen, B., Van Beek, K., De Pril, M., Bossuyt, I., & Menten, J. (2019).	What do hospitalists experience as barriers and helpful factors for having ACP conversations? A systematic qualitative evidence synthesis.	Excluded	Wrong Context - The article does not address strategic decisions in a business context.	Health
Varona, D., Lizama-Mue, Y., & Suárez, J. L. (2021).	Machine learning's limitations in avoiding automation of bias.	Excluded	Wrong Context - The article does not address strategic decisions in a business context.	AI
Velarde-García, J. F., Luengo-González, R., González-Hervías, R., Cardenete-Reyes, C., Alvarez-Embarba, B., & Palacios-Ceña, D. (2018).	Limitation of therapeutic effort experienced by intensive care nurses.	Excluded	Wrong Context - The article does not address strategic decisions in a business context.	Health
Velarde-García, J. F., Pulido-Mendoza, R., Moro-Tejedor, M. N., Cachón-Pérez, J. M., & Palacios-Ceña, D. (2016).	Nursing and end-of-life care in the intensive care unit.	Excluded	Wrong Context - The article does not address strategic decisions in a business context.	Health
Vender, R. J. (2015).	Leadership: An overview.	Excluded	Wrong Context - The article does not address strategic decisions in a business context.	Studies not focused on emotions and the strategic decision-making process
Ventura, A. F., Horne, C. E., Crane, P. B., Mendes, M. A., & Sears, S. (2020).	Exploring the experiences of individuals with an insertable cardiac monitor: Making the decision for device insertion.	Excluded	Wrong Context - The article does not address strategic decisions in a business context.	Health
Verhage, A., Noppe, J., Feys, Y., & Ledegen, E. (2018).	Force, stress, and decision-making within the Belgian police: The impact of stressful situations on police decision-making.	Excluded	Wrong Context - The article does not address strategic decisions in a business context.	Social
Verma, A., Smith, A. K., Harrison, K. L., & Chodos, A. H. (2019).	Ethical challenges in caring for unrepresented adults: A qualitative study of key stakeholders.	Excluded	Wrong Context - The article does not address strategic decisions in a business context.	Health
Vlacic, B., & Gonzalez-Loureiro, M. (2016).	Internationalization process and decision-making: An approach through the lens of the manager cognition.	Excluded	Wrong Publication Type	Conference Paper
Volpe, R. J., & Briesch, A. M. (2018).	Establishing evidence-based behavioral screening practices in US schools.	Excluded	Wrong Context - The article does not address strategic decisions in a business context.	Career / Education
Volz, K. G., & Von Cramon, D. Y. (2009).	How the orbitofrontal cortex contributes to decision making: A view from neuroscience.	Excluded	Wrong Publication Type	Book Chapter
Vrdoljak Raguz, I. (2007).	Decision-making process in crisis situations.	Excluded	Wrong Publication Type	Conference Paper
Vuori, T. O., & Huy, Q. N. (2022).	Regulating top managers' emotions during strategy making: Nokia's socially distributed approach enabling radical change from mobile phones to networks in 2007–2013.	Included	Included	Included
Vuppalapati, J. S., Kedari, S., Kedari, S., Vuppalapati, R., Vuppalapati, C., & Ilapakurti, A. (2018).	The role of selfies in creating the next generation computer vision infused outpatient data driven electronic health records (EHR).	Excluded	Wrong Publication Type	Health
Vyatkin, A. V., Fomina, L. V., & Shmeleva, Z. N. (2020).	Empathy, tolerance for uncertainty and emotional intelligence among the agro-industrial complex managers to predict the decision-making efficiency in the antagonistic game.	Excluded	Wrong Publication Type	Conference Paper
Wade, D. T. (2019).	Determining whether someone has mental capacity to make a decision: Clinical guidance based on a review of the evidence.	Excluded	Wrong Context - The article does not address strategic decisions in a business context.	Health
Wagemans, A. M. A., Lantman-de Valk, H. M. J. V., Proot, I. M., Metsemakers, J., Tuffrey-Wijne, I., & Curfs, L. M. G. (2013).	End-of-life decisions for people with intellectual disabilities: An interview study with patient representatives.	Excluded	Wrong Context - The article does not address strategic decisions in a business context.	Health
Wah, A., Hodge, S., Jones, S. H., & Perez Algorta, G. (2021).	A qualitative exploration of how people with bipolar disorder consider risk-taking in everyday decisions.	Excluded	Wrong Population + Wrong Context - The article does not address strategic decisions in a business context.	Health / Social
Walinga, J., & Caplan, D. H. (2014)	The role of intuition and insight in organizational decision making.	Excluded	Wrong Publication Type	Book Chapter
Walker, J. D. (2014).	Manifestation determination reviews and school team decision-making with students with emotional/behavioral disabilities.	Excluded	Wrong Context - The article does not address strategic decisions in a business context.	Career / Education
Wallach, W., Franklin, S., & Allen, C. (2010).	A conceptual and computational model of moral decision making in human and artificial agents.	Excluded	Wrong Context - The article does not address strategic decisions in a business context.	Health / AI
Walsh, A. (2016).	The role of emotions mediating decision-making among successful poker players.	Excluded	Wrong Context - The article does not address strategic decisions in a business context.	Decision / Emotion Theory
Walter, M., Papachristou, C., Danzer, G., Klapp, B. F., & Frommer, J. (2004).	Die Entscheidung potentieller Spender zur Leberlebendspende: Eine inhaltsanalytische Untersuchung zu Ambivalenz und Motivation in präoperativen Interviews. [The decision of potential donors to donate for a liver transplant: A content analysis of expressed ambivalence and motivation in preoperative interviews.].	Excluded	Wrong Context - The article does not address strategic decisions in a business context.	Health
Walter, M., Papachristou, C., Danzer, G., Klapp, B. F., & Frommer, J. (2004).	The decision of the individual to donate a liver: Content analysis of preoperative interviews with respect to ambivalence and motivation.	Excluded	Wrong Context - The article does not address strategic decisions in a business context.	Health
Walter, M., Papachristou, C., Danzer, G., Klapp, B. F., & Frommer, J. (2004).	Willingness to donate: An interview study before liver transplantation.	Excluded	Wrong Context - The article does not address strategic decisions in a business context.	Health / Social
Walter, S., Keinki, C., & Hübner, J. (2020).	Treatment decisions in oncology: Walking the tightrope between honesty and hope, lifetime, and quality of life.	Excluded	Wrong Context - The article does not address strategic decisions in a business context.	Health
Walton, G. D., Ross, L. E., Stewart, D. E., Grigoriadis, S., Dennis, C. L., & Vigod, S. (2014).	Decisional conflict among women considering antidepressant medication use in pregnancy.	Excluded	Wrong Context - The article does not address strategic decisions in a business context.	Health
Walton, K. C. (2008).	An examination of the factors related to the ethical decision-making process of mental health professionals.	Excluded	Wrong Context - The article does not address strategic decisions in a business context.	Health
Wang, G. N., Chen, T., Chen, J. W., Deng, K. F., & Wang, R. D. (2022).	Simulation of crowd dynamics in pedestrian evacuation concerning panic contagion: A cellular automaton approach.	Excluded	Wrong Context - The article does not address strategic decisions in a business context.	Social
Wang, J. Q., Wang, S. Q., Guo, Y. X., Hu, X. P., Li, X. T., & Cheng, J. (2019).	Towards intelligent decision making in emotion-aware applications.	Excluded	Wrong Publication Type	Conference Paper
Wang, X. Y., Wang, J. Q., Zhang, J. L., & Ban, X. G. (2015).	Lane-changing model with dynamic consideration of driver's propensity.	Excluded	Wrong Context - The article does not address strategic decisions in a business context.	Social
Wang, X., Pan, Y., Zhang, K. C., Sui, Y. J., Lv, T. J., Xu, S. H., & Gao, L. (2017).	Emotional experience and personality traits influence individual and joint risk-based decision making.	Excluded	Wrong Context - The article does not address strategic decisions in a business context.	Social
Wang, Z., Zhang, J. L., & Wang, W. L. (2012).	Using GA-based simulation to cooperative climate strategy of climate game problem.	Excluded	Wrong Publication Type	Conference Paper
Wayne, R. H. (2012).	Review of Using the law: Practical decision making in mental health.	Excluded	Wrong Context - The article does not address strategic decisions in a business context.	Health
Wen, F. H., Chiang, M. C., Huang, C. C., Hu, T. H., Chou, W. C., Chuang, L. P., & Tang, S. T. (2023).	Quality of dying and death in intensive care units: Family satisfaction.	Excluded	Wrong Context - The article does not address strategic decisions in a business context.	Health
Wendt, A., Schaat, S., Gelbard, F., Muchitsch, C., & IEEE. (2013).	Usage of spreading activation for content retrieval in an autonomous agent.	Excluded	Wrong Publication Type	Conference Paper
Wenzel, A. (2013)	Behavioral activation.	Excluded	Wrong Publication Type + Wrong Context	Chapter / Health
Wenzel, A. (2013)	Cognitive case conceptualization and treatment planning.	Excluded	Wrong Publication Type + Wrong Context	Chapter / Health
Wenzel, A. (2013)	Cognitive restructuring: Automatic thoughts.	Excluded	Wrong Publication Type + Wrong Context	Chapter / Health
Werth Jr., J. L., & Blevins, D. (2009)	Decision making near the end-of-life: Issues, developments, and future directions.	Excluded	Wrong Publication Type + Wrong Context	Book / Health
Werth Jr., J. L., & Blevins, D. (2009)	Decision making near the end-of-life: Issues, developments, and future directions.	Excluded	Wrong Publication Type + Wrong Context	Book / Health
Werth Jr., J. L., & Gordon, J. R. (2002).	Amicus curiae brief for the United States Supreme Court on mental health issues associated with "physician-assisted suicide".	Excluded	Wrong Context - The article does not address strategic decisions in a business context.	Health
Wesley, M. J. (2011).	Neurofunctional deficits during decision-making and affective processing in chronic marijuana users.	Excluded	Wrong Context - The article does not address strategic decisions in a business context.	Health
Wheeler, M. (2015).	Measuring the effectiveness of "The Major Decision": A career counseling group for undecided and re-deciding first-year, first-generation college students.	Excluded	Wrong Context - The article does not address strategic decisions in a business context.	Health
Whiston, L., Barry, J., O'Keane, V., & Darker, C. (2019).	Patient, family and clinician preferences for the intensity and implementation of patient and family participation in healthcare design and delivery in psychiatry.	Excluded	Wrong Context - The article does not address strategic decisions in a business context.	Health
Whittington, R., & Mason, T. (1995).	A new look at seclusion – Stress, coping, and the perception of threat.	Excluded	Wrong Context - The article does not address strategic decisions in a business context.	Health
Wiecek-Janka, E., Majchrzak, J., Wyrwicka, M., & Weber, G. W. (2021).	Application of grey clusters in the development of a synthetic model of the goals of Polish family enterprises' successors.	Excluded	Wrong Context - The article does not address strategic decisions in a business context.	Studies not focused on emotions and the strategic decision-making process
Williams, G. A., & Miller, R. B. (2002).	Change the way you persuade.	Included	Included	Included
Williams, L. (2016).	Women veterans' perceptions of mental health outpatient services.	Excluded	Wrong Context - The article does not address strategic decisions in a business context.	Health
Williams, M. B. (2004).	A study of the cognitive moral development theory and ethics in state mental health.	Excluded	Wrong Context - The article does not address strategic decisions in a business context.	Health
Willis, M. L., Lawson, D. L., Ridley, N. J., Koval, P., & Rendell, P. G. (2015).	The contribution of emotional empathy to approachability judgments assigned to emotional faces is context specific.	Excluded	Wrong Context - The article does not address strategic decisions in a business context.	Decision / Emotion Theory
Wills, C. E., & Holmes-Rovner, M. (2006).	Integrating decision making and mental health interventions research: Research directions.	Excluded	Wrong Context - The article does not address strategic decisions in a business context.	Health
Wilson, R. S. (2007).	What motivates choice? Behavioral decision theory for environmental policy and management.	Excluded	Wrong Publication Type	Dissertation
Winecoff, A. A., & Huettel, S. A. (2017)	Cognitive control and neuroeconomics.	Excluded	Wrong Publication Type	Book
Winterich, K. P., Morales, A. C., & Mittal, V. (2015).	Disgusted or happy, it is not so bad: Emotional mini-max in unethical judgments.	Excluded	Wrong Context - The article does not address strategic decisions in a business context.	Social
Wirth, J. H. (2016)	Methods for investigating social exclusion.	Excluded	Wrong Publication Type + Wrong Context	Chapter / Social
Wisniewski, K. A. (2008).	The role of seizure lateralization and seizure control in pre- and postoperative levels of depression and memory functioning.	Excluded	Wrong Context - The article does not address strategic decisions in a business context.	Health
Wolf, A. G., Auerswald, S., Seinsche, A., Saul, I., & Klocke, H. (2021).	German student teachers' decision process of becoming a teacher: The relationship among career exploration and decision-making self-efficacy, teacher motivation and early field experience.	Excluded	Wrong Context - The article does not address strategic decisions in a business context.	Health
Wolff, N., Fabrikant, N., & Belenko, S. (2011).	Mental health courts and their selection processes: Modeling variation for consistency.	Excluded	Wrong Context - The article does not address strategic decisions in a business context.	Health
Woodhead, E. L., Lynch, E. B., & Edelstein, B. A. (2011).	Decisional strategy determines whether frame influences treatment preferences for medical decisions.	Excluded	Wrong Context - The article does not address strategic decisions in a business context.	Health
Woods, J. N. (2010).	When a soldier returns home from Iraq and/or Afghanistan with post-traumatic stress disorder: The lived experience of the spouse.	Excluded	Wrong Context - The article does not address strategic decisions in a business context.	Military
Wu, D. M., & Zheng, J. J. (2023).	Social media overload, gender differences and knowledge withholding.	Excluded	Wrong Context - The article does not address strategic decisions in a business context.	Social
Wu, F. G., Lee, Y. J., & Lin, M. C. (2004).	Using the fuzzy analytic hierarchy process on optimum spatial allocation.	Excluded	Wrong Context - The article does not address strategic decisions in a business context.	Decision / Emotion Theory
Wynaden, D., Chapman, R., McGowan, S., Holmes, C., Ash, P., & Boschman, A. (2002).	Through the eye of the beholder: To seclude or not to seclude.	Excluded	Wrong Context - The article does not address strategic decisions in a business context.	Studies not focused on emotions and the strategic decision-making process
Xie, E. H., Liu, M. D., Liu, J. Q., Gao, X. X., & Li, X. C. (2022).	Neural mechanisms of the mood effects on third-party responses to injustice after unfair experiences.	Excluded	Wrong Context - The article does not address strategic decisions in a business context.	Health
Xie, H. Y., & DEStech Publicat Inc. (2015).	Research on the psychological impact and emotional touch on human of the digital color design products.	Excluded	Wrong Publication Type	Conference Paper
Xing, C. (2009).	The effects of emotion and motivation on attentional patterns in the decision-making process.	Excluded	Wrong Context - The article does not address strategic decisions in a business context.	Decision / Emotion Theory
Xu, H. (2021).	Self-control in career decision-making: The roles of the hot and cool systems of gratification delay.	Excluded	Wrong Context - The article does not address strategic decisions in a business context.	Health
Xu, M., Lee, W.-K., Ko, C.-H., Chiu, Y.-C., & Lin, C.-H. (2021).	The prominent deck B phenomenon in schizophrenia: An empirical study on Iowa gambling task.	Excluded	Wrong Context - The article does not address strategic decisions in a business context.	Health
Yakut, E., & Kara, E. (2022).	Determining role of employee empowerment and perceived organizational support in the effect of SHRM on job satisfaction and turnover intention.	Excluded	Wrong Context - The article does not address strategic decisions in a business context.	Studies not focused on emotions and the strategic decision-making process
Yamamoto, S., Arao, H., Masutani, E., Aoki, M., Kishino, M., Morita, T., Shima, Y., Kizawa, Y., Tsuneto, S., Aoyama, M., & Miyashita, M. (2017).	Decision making regarding the place of end-of-life cancer care: The burden on bereaved families and related.	Excluded	Wrong Context - The article does not address strategic decisions in a business context.	Health
Yan, L. (2016).	Radical change and organizational members' behavior in Chinese SOEs: The effects of history and emotions.	Excluded	Wrong Publication Type	Dissertation
Yang, H. W., Pan, Z. G., Zhang, M. M., & Ju, C. H. (2008).	Modeling emotional action for social characters.	Excluded	Wrong Context - The article does not address strategic decisions in a business context.	Social
Yao, C. W., & Chen, G. C. (2001).	A emotion development agent model based on OCC model and operant conditioning.	Excluded	Wrong Publication Type	Congress Paper
Yates, C. A. (2019).	Co-teaching: Loss of professional space from the perspectives of special education and general education teachers.	Excluded	Wrong Context - The article does not address strategic decisions in a business context.	Career / Education
Yemelyanov, A., & Yemelyanov, A. (2020).	Performance evaluation process and express decision.	Excluded	Wrong Context - The article does not address strategic decisions in a business context.	Studies not focused on emotions and the strategic decision-making process
Yoshikawa, S., & Takagi, O. (1998).	A study of the decision-making process of driving behavior using protocol analysis.	Excluded	Wrong Context - The article does not address strategic decisions in a business context.	Health
Young, J. M., Marshall, C. L., & Anderson, E. J. (1994).	Amyotrophic-lateral-sclerosis patients perspectives on use of mechanical ventilation.	Excluded	Wrong Context - The article does not address strategic decisions in a business context.	Health
Young, S. (2018).	The decision-making process inherent with hiring career counselors who advise international students.	Excluded	Wrong Context - The article does not address strategic decisions in a business context.	Health
Yu, P. H., Lin, L. F., Li, Z. Y., & IEEE. (2015).	Human factors based partitioning versus data clustering for recommendations.	Excluded	Wrong Publication Type	Conference Paper
Yu, X. Y., Liu, T., He, L., & Li, Y. J. (2023).	Micro-foundations of strategic decision-making in family business organizations: A cognitive neuroscience perspective.	Included	Included	Included
Yuen, K. S. L., & Lee, T. M. C. (2003).	Could mood state affect risk-taking decisions?	Excluded	Wrong Context - The article does not address strategic decisions in a business context.	Health
Zhan, Y. L., Xiao, X., Tan, Q. B., Li, J., & Zhong, Y. P. (2022).	Influence of reputational concern and social distance on moral decision-making under the harmful dilemma: Evidence from behavioral and ERPs study.	Excluded	Wrong Context - The article does not address strategic decisions in a business context.	Health
Zhang, B. L., & Shou, Y. Y. (2022).	Immediate emotions and subjective stakes in risky decision-making under uncertainty.	Excluded	Wrong Context - The article does not address strategic decisions in a business context.	Health
Zhang, X. Y., Li, Z. P., & Jiang, J. M. (2021).	Emotion attention-aware collaborative deep reinforcement learning for image cropping.	Excluded	Wrong Context - The article does not address strategic decisions in a business context.	Social
Zhang, Y. W., Wang, W. J., Zhou, X. Y., Wang, Q., & Sun, X. H. (2023).	Tactical-level explanation is not enough: Effect of explaining AV's lane-changing decisions on drivers' decision-making, trust, and emotional experience.	Excluded	Wrong Context - The article does not address strategic decisions in a business context.	Social
Zhao, D., Gu, R. L., Tang, P., Yang, Q. W., & Luo, Y. J. (2016).	Incidental emotions influence risk preference and outcome evaluation.	Excluded	Wrong Context - The article does not address strategic decisions in a business context.	Health
Zhao, X., Wang, C., Yang, Z. F., Zhang, Y., & Yuan, X. J. (2016).	Online news emotion prediction with bidirectional LSTM.	Excluded	Wrong Publication Type	Conference Paper
Zhao, Y. Y., Wang, D. L., Wang, X. Y., & Chiu, S. C. (2022).	Brain mechanisms underlying the influence of emotions on spatial decision-making: An EEG study.	Excluded	Wrong Context - The article does not address strategic decisions in a business context.	Health
Zhen, T., Xuan, Y., & Jing, Z. (2012).	Trusting relationships of CTO-CEO and CTO's participation in technology strategy: Based on empirical study of Chinese high-tech firms.	Excluded	Wrong Context - The article does not address strategic decisions in a business context.	Incluir
Zhong, C.-B. (2008).	The ethical dangers of rational decision making.	Excluded	Wrong Publication Type	Dissertation
Zhong, Y. (2024).	Being an Asian student in special education: Do race and stereotypes matter in the identification of specific learning disabilities?	Excluded	Wrong Context - The article does not address strategic decisions in a business context.	Career / Education
Zhou, W. C., Zhu, Z., & Vredenburgh, D. (2020).	Emotional intelligence, psychological safety, and team decision making.	Excluded	Wrong Context - The article does not address strategic decisions in a business context.	Social
Zhou, W. D., & Coggins, R. (2002).	Computational models of the amygdala and the orbitofrontal cortex: A hierarchical reinforcement learning system for robotic control.	Excluded	Wrong Publication Type	Book Chapter
Zhu, X., Basappa, S. N., Ridgeway, J. L., Albertie, M. L., Pantoja, E., Prescott, D., & Breitkopf, C. R. (2020).	Perspectives regarding family disclosure of genetic research results in three racial and ethnic minority populations.	Excluded	Wrong Context - The article does not address strategic decisions in a business context.	Social
Zimmermann, B. M., Shaw, D. M., Elger, B., & Koné, I. (2021).	The use of heuristics in genetic testing decision-making: A qualitative interview study.	Excluded	Wrong Context - The article does not address strategic decisions in a business context.	Decision / Emotion Theory
Zisman-Ilani, Y., Roe, D., Scholl, I., Harter, M., & Karnieli-Miller, O. (2017).	Shared decision making during active psychiatric hospitalization: Assessment and psychometric properties.	Excluded	Wrong Context - The article does not address strategic decisions in a business context.	Health
Zonjic, M. (2021).	Framing violence: The politics of representing embodied trauma in feminist geographic film.	Excluded	Wrong Context - The article does not address strategic decisions in a business context.	Social
Zoppis, I., Dondi, R., Coppetti, D., & Beltramo, A., & Mauri, G. (2018).	Distributed heuristics for optimizing cohesive groups: A support for clinical patient engagement in social network analysis.	Excluded	Wrong Publication Type	Health
Zou, R., Zeb, S., Nisar, F., Yasmin, F., Poulova, P., & Haider, S. A. (2022).	The impact of emotional intelligence on career decision-making difficulties and generalized self-efficacy among university students in China.	Excluded	Wrong Context - The article does not address strategic decisions in a business context.	Health
Zucco, C., Liang, H. Z., Di Fatta, G., & Cannataro, M. (2018).	Explainable sentiment analysis with applications in medicine.	Excluded	Wrong Publication Type	Conference Paper
